# Supplementary material for: An integrated platform approach enables discovery of potent, selective and ligand-competitive cyclic peptides targeting the GIP receptor
Source: Royal Society of Chemistry journal article supplement (doi:10.1039/d1sc06844j), 2022-01-01
Supplement: d1sc06844j1.xlsx [file d1sc06844j1.xlsx]

## Sheet: full_clusters_analysis_GIPR_300
index	sequence	reads round 1	reads round 2	reads round 3	reads round 4	reads round 5	cluster_ID
0	CLILPIFPYFIC	27	410	167003	814660	1557698	A
1	CLIIPVFPFFIC	12	345	115188	459667	773754	A
2	CLMLSFLPYNIC	6	252	86726	358968	455140	A
3	CFQYFHILWPFC	10	272	56138	202211	194297	B
4	CLFLPVYPFFVC	7	173	58049	185947	136732	A
5	CFIHWDMLWPFC	10	463	84949	187893	96764	B
6	CLFLPVYPFFIC	0	4	2217	31841	88223	A
7	CLMLSWPYSNIC	5	232	44922	136828	85613	A
8	CLMLPVYPFLIC	5	220	46308	120341	67439	A
9	CLFLPVFPFFVC	0	154	28275	72077	40119	A
10	CLILPIFPYFVC	1	3	1717	17413	34327	A
11	CLVLPIFPFFVC	3	168	34825	71109	33395	A
12	CLMLPFLPYNIC	1	3	1752	14637	31632	A
13	CLILPVFPYFIC	0	6	2702	15029	30668	A
14	CLIIPVFPFFVC	0	4	2063	19085	28581	A
15	CLFLPVFPFFIC	0	0	1164	12649	24094	A
16	CLIIPIFPWILC	1	129	21844	41400	22003	A
17	CLFLPVFPYWLC	7	187	39417	65392	20171	A
18	CLIIPVFPYFIC	0	0	272	4000	16230	A
19	CIRLNLLLPYIC	3	75	8619	26322	15900	H
20	CQYLPFLLIPFC	1	174	18076	39393	15057	D
21	CLVLPLFPFFIC	3	104	16931	29081	13811	A
22	CVSFYACFPLLC	3	123	14522	33349	13113	C
23	CLILPIFPYLIC	0	1	1486	7949	11785	A
24	CVSYLACFPWSC	0	133	14795	33680	11543	C
25	CLIIPVFPFLIC	0	2	1295	7057	10082	A
26	CLYLPVFPFFIC	0	19	4342	11445	10061	A
27	CLYLPVFPFFVC	2	117	16088	27715	9152	A
28	CFSFYACFPLYC	0	98	10976	21506	8626	C
29	CLILPTFPYFIC	0	2	911	5268	8023	A
30	CFIHWDMLWPIC	2	1	1296	9596	7692	B
31	CLLLPLFPWFVC	3	141	17744	26378	7585	A
32	CLFLPVFPYWIC	0	2	1448	5945	7457	A
33	CLVLPIFPYFIC	0	2	589	3656	6720	A
34	CLWHRAWSYYIC	2	92	9135	17871	6546	K
35	CYVWRQMLLC	2	111	13608	25563	6109	J
36	CLVLPIFPFFIC	1	0	262	2886	5955	A
37	CFTHFHVLWPFC	2	86	8363	16993	5291	B
38	CLMFQPFYSNIC	0	67	6117	12074	4995	E
39	CLILPILPYFIC	0	0	708	3832	4872	A
40	CLTLPIFPYFIC	0	0	658	3369	4582	A
41	CLFLPVYPYFIC	0	0	176	1609	4520	A
42	CLILPIFPYYIC	0	0	259	2275	4496	A
43	CLIFTYSKLLSC	4	68	6085	13167	4234	F
44	CPWLFSQFAFWC	3	112	10350	14565	4222	G
45	CLILAPQYPNVC	0	133	9674	16745	4207	E
46	CLPWFILRSVVC	0	158	14895	20685	4176	M
47	CLILPIFPYFMC	0	0	796	5437	4105	A
48	CLILPIFPFFIC	0	0	274	2050	4041	A
49	CLILPIFPYFTC	1	1	729	4795	4021	A
50	CFQYFHILWPLC	0	3	1066	5926	3982	B
51	CLILPISPYFIC	0	0	650	3313	3957	A
52	CLILPIFPHFIC	0	3	520	2957	3951	A
53	CLIPPIFPYFIC	0	0	550	2890	3923	A
54	CPWAFTIFRFWC	1	111	9747	12633	3911	L
55	CLLLPLFPWFIC	0	0	638	3806	3686	A
56	CLYLPVFPFFLC	3	80	6407	11669	3675	A
57	CPILPIFPYFIC	0	0	513	2657	3577	A
58	CLILPIFPYSIC	0	2	545	2864	3562	A
59	CLMLPVYPFFIC	0	0	195	1904	3524	A
60	CFIHWDMLWPLC	2	4	1949	7772	3506	B
61	CLIIPVLPFFIC	0	1	498	2710	3285	A
62	CLFLPVFPYFIC	0	0	899	2700	3279	A
63	CLMLPWLSSHIC	1	57	4931	9600	3117	A
64	CVSYLACFPWFC	0	6	974	4328	2898	C
65	CLIIPVFPLFIC	0	3	504	2456	2762	A
66	CLMLSFLPYFIC	0	1	70	1276	2761	A
67	CLILPIYPYFIC	0	0	144	1059	2743	A
68	CFRFFSLLWPFC	1	56	4976	7556	2701	B
69	CLIIPVFPFFMC	0	3	610	3582	2650	A
70	CLIIPVSPFFIC	0	0	454	2060	2384	A
71	CLIIPVFPFFTC	0	0	513	3049	2366	A
72	CFILPIFPYFIC	0	2	317	1839	2341	A
73	CLIIPAFPFFIC	0	2	355	1893	2285	A
74	CLMLSFLPYNVC	0	2	283	2332	2248	A
75	CLITPVFPFFIC	0	4	406	2004	2232	A
76	CLLLPLFPFLIC	1	79	4600	7458	2163	A
77	CLMLPWPYSNIC	0	1	714	2889	2154	A
78	CLIIPVYPFFIC	0	0	312	1086	2142	A
79	CPIIPVFPFFIC	1	0	330	1596	2036	A
80	CLVLPVFPFLLC	2	75	9825	10809	2024	A
81	CLIIPVFPSFIC	0	1	378	1778	1989	A
82	CLIIPVFPFSIC	0	0	374	1733	1966	A
83	CLTIPVFPFFIC	0	0	378	1640	1934	A
84	CLFIPVYPFFIC	2	22	3015	5291	1920	A
85	CLILPIFPYFLC	0	0	253	1772	1878	A
86	CLFLPIFPYFIC	0	0	179	955	1877	A
87	CLILPIFPYNIC	0	0	41	1387	1803	A
88	CLILPIFPFFLC	0	47	4683	6356	1756	A
89	CFVFTFSRLLSC	0	55	2617	4965	1669	F
90	CLVIPVFPFFIC	0	0	228	1100	1664	A
91	CFIHWDMLWPVC	0	0	442	2691	1643	B
92	CLMLPVYPFLVC	0	0	479	2578	1641	A
93	CLIIPVFPFFLC	0	0	214	1672	1636	A
94	CLMLSFLPYNTC	0	1	413	2208	1531	A
95	CLIIPIFPYFIC	0	0	42	518	1489	A
96	CFTHWDMLWPFC	0	3	1228	3092	1479	B
97	CLILPIFPFFVC	0	0	221	1206	1427	A
98	CFQYFHILWPSC	0	1	398	2373	1420	B
99	CLIIPVFPFYIC	0	0	134	1002	1399	A
100	CLILPIFPCFIC	0	0	201	1141	1392	A
101	CLILPLFPFLVC	0	67	3548	5316	1371	A
102	CLMSSFLPYNIC	0	1	302	1340	1348	A
103	CVSFYACFPLFC	0	4	546	2333	1311	C
104	CFLCLPMFFLGC	0	55	2736	4397	1303	I
105	CLFLPNWHLYSC	0	53	3169	4609	1298	0
106	CLILPIFPYFSC	0	0	391	1746	1293	A
107	CLMLSSLPYNIC	0	0	288	1293	1292	A
108	CQYLPFLLIPIC	0	0	211	1839	1284	D
109	CVSYLACFPWYC	0	5	736	2297	1280	C
110	CLMLSFLPHNIC	0	3	278	1310	1275	A
111	CLMLSLLPYNIC	0	0	324	1522	1254	A
112	CLFLPVYPFFAC	1	3	599	2810	1244	A
113	CLIVPVFPFFIC	0	0	222	1023	1242	A
114	CLMLSFSPYNIC	0	1	280	1272	1238	A
115	CLMLSFLPYNMC	0	1	397	2428	1228	A
116	CLMLSWPYPNIC	0	0	535	1912	1214	A
117	CSYMLFWTC	1	44	2802	4546	1200	0
118	CPWLFTCFSFFC	0	100	4227	5805	1195	G
119	CYVWRQMLIC	0	3	241	1951	1192	J
120	CSMLSFLPYNIC	0	1	231	1187	1191	A
121	CFLCLPMFYYLC	1	45	2218	3783	1172	I
122	CFIHFSFLWPFC	0	47	1983	3550	1169	B
123	CLLLPVYPFFVC	0	1	644	1825	1162	A
124	CLFLPVYPFFLC	0	0	247	1694	1119	A
125	CFRYFHILWPFC	0	2	307	1196	1108	B
126	CLILPTFPYFLC	1	29	3297	4177	1076	A
127	CLVLPLFPYFIC	0	1	97	702	1074	A
128	CLIMPIFPYFIC	0	0	278	821	1068	A
129	CLIIPIFPWIFC	0	2	409	2087	1065	A
130	CCFSFYFCPIFC	0	34	2609	3758	1058	C
131	CFIIPVFPFFIC	0	0	174	883	1041	A
132	CMFLPFLLMPFC	0	38	1820	3241	1041	D
133	CLILSIFPYFIC	0	0	108	648	1027	A
134	CLIQPIFPYFIC	1	0	106	758	1016	A
135	CLVLPLFPFFVC	1	21	1643	3075	1002	A
136	CLILPIFPYFIY	0	0	118	628	999	A
137	CFQYFHILWPIC	0	0	137	1107	975	B
138	CLILPIFPYFNC	0	0	198	1204	956	A
139	CRFLPFLLQPFC	0	36	2123	3622	943	D
140	CLIIPVFPFFSC	0	1	254	1271	935	A
141	CIRLNLLLPYMC	0	6	494	1724	918	H
142	CLQYFHILWPFC	0	1	313	1285	917	B
143	CLVLSFLPYNIC	0	1	234	895	904	A
144	CFQYFHILWPYC	0	1	196	1282	875	B
145	CLILLIFPYFIC	0	0	84	597	864	A
146	CLIIPVFLFFIC	0	0	147	745	857	A
147	CFQYLHILWPFC	0	2	278	1129	853	B
148	CFIHWDILWPFC	0	4	323	1139	851	B
149	CLTLSFLPYNIC	0	0	223	863	842	A
150	CHILPIFPYFIC	0	0	107	605	832	A
151	RLILPIFPYFIC	0	0	96	465	827	A
152	CLMLSFLPYSIC	0	2	190	933	826	A
153	CFQYFRILWPFC	1	1	211	903	825	B
154	CLIHWDMLWPFC	0	1	467	1547	825	B
155	CLILSFLPYNIC	1	2	131	673	820	A
156	CRFLHPFGLYFC	0	28	2399	3302	814	0
157	CLMLSWPYSNVC	0	0	224	1297	799	A
158	CLFLPVYPYFVC	0	0	101	453	796	A
159	CLILPIFPYIIC	0	0	84	491	784	A
160	CLILPFLTFHIC	2	35	1478	2582	782	A
161	CCFSFYACFFSC	0	30	2223	2852	775	C
162	CLILPVFPYFVC	0	1	36	327	770	A
163	CLILPVYPFFVC	0	0	116	604	762	A
164	CLILPVFPFLLC	1	8	1379	2361	746	A
165	CFIHWDMLWPSC	0	1	661	2170	738	B
166	CLILPVFPFFIC	0	0	29	265	737	A
167	CLILPIFPYFFC	1	0	139	993	720	A
168	CFQYFHTLWPFC	0	0	254	1019	719	B
169	CLIFQPVYPNIC	0	5	850	1991	711	E
170	CFLAFHYLWPFC	0	31	1374	2168	706	B
171	CLLLPVYPFFIC	0	0	36	296	705	A
172	CSQYFHILWPFC	0	2	245	1009	695	B
173	CLVLPVYPFLIC	0	0	385	1170	691	A
174	CFQYFHIPWPFC	0	1	195	892	688	B
175	CLILPIFSYFIC	0	0	92	503	679	A
176	CQYLPFLLIPLC	0	2	417	1679	673	D
177	CLMLSFFPYFIC	0	0	19	401	669	A
178	CLFLPVYPFLIC	0	0	81	542	662	A
179	CLILPIFLYFIC	0	1	106	428	659	A
180	CLMFQPFYPNIC	0	2	241	910	659	E
181	SLILPIFPYFIC	0	1	61	380	647	A
182	CVSFLACIPYLC	0	34	1955	2896	640	C
183	CLIIPMFPFFIC	0	0	110	515	638	A
184	CFQYFHILRPFC	0	1	228	916	631	B
185	CFQHFHILWPFC	0	0	248	906	628	B
186	CLILPIFPYFIS	0	0	72	399	620	A
187	CLFLPVFPYWPC	1	2	486	1782	615	A
188	CLMLSFLPYYIC	0	0	60	464	612	A
189	CLMLSFMPYNIC	0	0	58	483	608	A
190	CFLCLPMFFLSC	1	28	1939	2564	606	I
191	CLFLPVYPFLVC	0	1	276	1013	591	A
192	CFQYSHILWPFC	1	0	206	835	585	B
193	CLIIPVFPFFNC	0	0	126	826	583	A
194	CVSYLACFPWLC	0	0	105	660	583	C
195	CLMLSFLPYDIC	0	0	119	602	580	A
197	CLILPIIPYFIC	1	1	92	494	576	A
196	CLIITVFPFFIC	0	0	85	367	576	A
198	CLILPVYPFFIC	0	0	7	123	573	A
199	CLWHRAWSYFIC	0	0	67	620	556	K
200	CLILPIFTYFIC	0	0	57	265	549	A
201	CWFVHSFSLYVC	1	24	1928	2123	545	0
202	CLNLPIFPYFIC	0	1	63	351	544	A
203	YLILPIFPYFIC	0	0	47	296	543	A
204	CLVLPIFPFLVC	0	3	413	1071	539	A
205	CWPFPMFLLMSC	1	88	2177	2661	537	0
206	CLMLSFLPCNIC	0	0	128	544	532	A
207	CFQYFHILWPCC	0	0	164	802	521	B
208	CLFLPVYPLFVC	1	0	240	859	521	A
209	CLMLSFLPYNNC	0	1	135	783	516	A
210	CLILPTFPFFLC	0	32	1550	2146	514	A
211	CLIIPVFPFFIY	0	0	98	420	507	A
212	CLILPIFHYFIC	0	0	62	279	505	A
213	CLFLPVFPFFAC	0	0	269	1092	496	A
214	CLFLPVYPFFGC	0	0	186	947	494	A
215	CIRLNLLLPFIC	0	0	49	428	491	H
216	CIILPIFPYFIC	0	0	64	293	485	A
217	CLILPVYPFLIC	0	0	168	553	485	A
218	CFIHWDMLWPYC	0	0	271	1125	483	B
219	CQYLPFLLIPYC	0	1	387	1106	483	D
220	CFQYFHILWPVC	0	0	86	584	479	B
221	CLILPILPYNIC	0	0	12	229	478	A
222	CCFFLFPYVLYC	0	33	1382	1871	470	0
223	CFIHWDTLWPFC	0	4	397	1021	468	B
224	CLIIPVFPVFIC	0	1	70	353	465	A
225	CIFLPIWSFLAC	0	36	1316	1948	464	A
226	CLIIPVFPFIIC	0	0	74	302	463	A
227	CLIISVFPFFIC	0	0	63	336	463	A
228	CFIHWDMPWPFC	0	0	308	926	461	B
229	CLFPPVYPFFVC	1	1	220	759	460	A
230	CLMLPVYPFLMC	0	1	430	1562	458	A
231	CLILPIFPNFIC	0	0	69	363	457	A
232	CLMLSFLSYNIC	0	1	90	390	453	A
233	CLFLPVFPFFLC	0	1	148	750	451	A
234	CFQNYLMYLIVC	1	25	807	1620	449	0
235	CLIIPVVPFFIC	0	0	63	345	447	A
236	CLFLPAYPFFVC	0	1	211	814	446	A
237	CLIIPVFPFFFC	0	0	88	602	446	A
238	CVILPIFPYFIC	0	1	57	355	443	A
239	CFIHWDMLRPFC	0	0	352	995	435	B
240	CSFLPVYPFFVC	0	0	163	745	429	A
241	CLMLSFLPYNSC	0	0	120	683	428	A
242	CLMPSWPYSNIC	0	0	196	751	421	A
243	RLIIPVFPFFIC	0	0	62	288	419	A
244	CLVLPVFPFFVC	0	0	245	705	418	A
247	CLLLPVFPFFVC	1	0	415	924	416	A
246	CLFLPVFPYWFC	0	0	170	918	416	A
245	CFQYFHVLWPFC	0	0	141	629	416	B
248	CLSLPVYPFFVC	0	2	218	854	415	A
249	CHIIPVFPFFIC	0	0	68	340	411	A
250	CLFLPVYPFSVC	0	1	206	758	408	A
251	CLILPVFPFFVC	0	0	67	315	397	A
252	CYALPFPLMLLC	0	44	1915	2232	397	0
253	CLMLSWPYYNIC	0	2	82	350	396	A
254	CLMLTFLPYNIC	0	0	78	363	395	A
255	CLVLPIFPFFAC	0	3	266	1111	385	A
256	CCFSFYFCLFPC	0	18	826	1338	379	C
258	CPWIFSDYSFFC	0	38	1133	1638	378	G
257	CLIIPVYPFLIC	0	0	39	310	378	A
259	CLIIPIFPWIVC	0	0	110	537	374	A
260	CLMLSWPYSNTC	1	0	209	1015	374	A
261	CFIYWDMLWPFC	0	1	123	447	373	B
262	CLILPIFPWILC	0	0	67	361	370	A
263	CLILPNFPYFIC	0	0	53	230	370	A
264	CLVLEYSMLVSC	0	31	1229	1633	370	F
265	CLIILVFPFFIC	0	0	50	283	367	A
266	CFIHWDMLWPCC	1	1	236	974	366	B
267	CLMLSWPYSNMC	0	1	224	1046	361	A
268	CLYLPVFPYFIC	0	0	44	267	361	A
269	CFIHRDMLWPFC	0	1	266	769	359	B
271	CLILTIFPYFIC	0	0	46	183	357	A
270	CLILHIFPYFIC	0	1	38	211	357	A
272	CLMLPIYPFLIC	1	12	502	1029	356	A
273	CLFLPVYPSFVC	1	0	186	685	354	A
274	CLILPWLSKNIC	1	32	1090	1692	354	A
275	CLMLPIFPYFIC	0	0	29	181	350	A
276	CLIIPVFSFFIC	0	0	60	285	347	A
277	CFQCFHILWPFC	0	1	109	475	344	B
278	CLMLPVYPLLIC	0	0	212	713	343	A
279	CQYLPFLLIPVC	0	0	93	639	341	D
280	CLMLSRPYSNIC	0	2	196	645	340	A
281	CSIHWDMLWPFC	0	3	286	753	336	B
282	CLNIPVFPFFIC	0	0	53	266	332	A
283	CFVHWDMLWPFC	0	0	204	630	331	B
284	CFSFYACFPLFC	0	0	140	492	330	C
285	CCWSFYACFLSC	0	46	1260	1540	327	C
286	CLMLSFLPYNIY	0	0	65	304	326	A
287	CLMPPVYPFLIC	0	0	185	628	319	A
288	CPFHFCFILYGC	0	33	1244	1402	318	0
289	CLFLPVFPFLIC	0	0	36	245	316	A
290	CLMLPVYPFPIC	0	1	156	612	314	A
291	CLLLPLFPYFLC	0	22	1490	1864	313	A
292	CLIIPVIPFFIC	0	0	59	286	311	A
293	CPWLFTCFSFIC	0	0	88	561	307	G
294	CLLLPVFPFFIC	0	0	24	157	303	A
296	CLILPIFPYFIR	0	0	54	211	302	A
295	CFIHWNMLWPFC	0	1	130	493	302	B
297	CLIIHVFPFFIC	0	0	39	183	300	A
298	CCFSFYACFVLC	0	24	766	1133	299	C
299	CLIIPVFQFFIC	0	0	47	145	297	A
300	CLIFPVFPFFIC	0	0	51	239	296	A
301	CLFFHPFSLYVC	0	18	1016	1428	295	0
302	CFSNYLAFLFCC	1	29	779	1126	294	0
303	CLIIPIFPWIIC	0	1	20	167	294	A
304	CLVLPIFPFFMC	0	0	137	578	293	A
305	CLFLPVHPFFVC	0	0	122	511	290	A
307	CLILPVFPYLIC	0	0	39	238	289	A
308	CLVLPIFPFFLC	0	1	191	693	289	A
306	CLIIPEFPFFIC	0	0	46	266	289	A
309	CFIHWDVLWPFC	1	1	276	624	287	B
310	CLMLPVYPFFVC	0	0	57	359	287	A
311	CLIIPVFPFFIS	0	0	44	212	285	A
312	CFAFFDALWPFC	0	24	590	989	284	B
313	CLFPPVYPFFIC	1	0	7	139	284	A
314	CLMLSFLLYNIC	0	0	51	268	278	A
315	CLIIPVFRC	0	0	9	144	273	A
316	CLMMSFLPYNIC	0	0	58	253	273	A
317	CLFLPVYPFFMC	0	0	6	228	271	A
318	CRILPIFPYFIC	0	0	31	167	271	A
319	CVSYLACFPWPC	0	2	191	643	270	C
321	CLILAPQYPNIC	0	0	50	348	268	E
320	CLFLPVYPLFIC	0	0	7	129	268	A
322	CMFFHPFSLYVC	1	14	842	1129	266	0
323	CLMLSFLPYNFC	0	0	49	401	265	A
324	CLSLPVYPFFIC	0	0	11	141	265	A
325	CLINPVFPFFIC	0	0	31	190	264	A
326	CIRLNLLLPNIC	0	0	22	248	263	H
327	CLILPIFPYFIF	0	0	35	133	263	A
328	CMMLSFLPYNIC	1	0	67	307	262	A
329	CVSFYACFPLIC	0	0	23	255	262	C
330	CLFLPAYPFFIC	0	0	4	138	261	A
331	CLIIPVFPIFIC	0	0	65	208	261	A
332	CLIIPVFPYWLC	0	0	86	342	261	A
335	CVSFYACFPLSC	0	18	672	988	260	C
333	CLFIPVFPFFIC	0	0	46	157	260	A
334	CLTLSWPYSNIC	0	1	123	448	260	A
336	CIRLNLLLPYVC	0	0	58	377	259	H
337	CLFLPVFPFLVC	0	0	202	566	259	A
338	CVSFYACFPLWC	0	0	144	508	258	C
339	CLLLPLFPFFIC	0	1	69	289	257	A
340	CLMLPVYPSLIC	0	0	166	514	257	A
341	YLIIPVFPFFIC	0	0	43	149	257	A
342	CLILPLFPFFLC	2	32	896	1229	256	A
343	CLMLPAYPFLIC	0	0	181	533	256	A
344	CFSFIACFPLCC	0	20	670	863	254	C
345	CLILPFFPYFIC	0	0	31	167	253	A
346	SLIIPVFPFFIC	0	0	39	152	252	A
348	CPMLSWPYSNIC	0	0	145	533	250	A
347	CFQYFHILWLFC	0	0	76	348	250	B
349	CLMLPVHPFLIC	0	0	161	572	249	A
350	CLLFLLPYFTC	1	23	617	909	246	0
351	CLVLPIFPYFVC	0	0	27	161	246	A
352	CCFSYYFCLVSC	0	19	556	865	243	C
353	CFQYFHMLWPFC	0	1	55	242	243	B
354	CLMLPVYPFLTC	0	0	203	709	242	A
355	CFLCLSMYLC	0	19	448	805	239	0
356	RLMLSFLPYNIC	0	0	41	189	234	A
359	CLLLPVFPYWLC	1	1	353	730	233	A
357	CFRFFTFLWPFC	0	21	492	836	233	B
358	CLFLPVFPYFVC	0	0	38	217	233	A
360	CLILPVFPFLIC	0	0	30	215	232	A
361	CLMLSFLPYKIC	0	0	57	272	231	A
362	CLMLSIFPYFIC	0	0	3	67	231	A
363	CFVSFSVLWPFC	1	18	503	780	225	B
364	CLMLSYLPYNIC	0	1	53	274	225	A
365	CLMLSWPYFIC	0	0	8	231	224	A
366	CIIIPVFPFFIC	0	0	42	138	223	A
367	CLMLSFLPYIIC	0	1	51	258	223	A
368	CFYCIPAVLYLC	1	27	495	836	222	0
369	CFQNYLMYLIAC	0	3	272	650	221	0
370	CLTLPVYPFLIC	0	0	122	358	219	A
371	CQYLPFLLIPSC	0	0	167	621	219	D
372	CFQYFQILWPFC	0	0	53	266	218	B
373	CLIIPVFPYFVC	0	0	3	47	218	A
374	CPWLFSQFAFCC	0	3	282	678	218	G
375	CLILPIFPYVIC	0	0	25	165	214	A
376	CLVLPVFPFFIC	0	0	10	109	214	A
377	CLILPTFPFFIC	0	0	40	212	213	A
378	CPCSFFPIWIFC	0	25	712	1057	212	0
379	CLMLPVFPFFIC	0	0	18	142	211	A
380	CLIRPIFPYFIC	0	0	28	129	210	A
381	FLILPIFPYFIC	0	0	24	116	207	A
382	CLMLPVYPFLSC	0	1	153	488	205	A
383	CLFLPVFPYWRC	0	1	152	570	204	A
384	CLIIPVFPFFAC	0	0	12	146	204	A
385	CFIHWGMLWPFC	1	1	286	572	202	B
386	CLLLPLFPYFIC	0	0	52	287	201	A
387	CPWLFSPFMFFC	0	25	1085	1138	200	G
388	CLFLPVFPFFGC	0	1	106	473	199	A
389	CLFLPVYPFFDC	0	0	84	404	199	A
390	CLYFSECVFAAC	0	0	100	385	199	0
391	CPMLPVYPFLIC	0	2	145	449	196	A
393	YLMLSFLPYNIC	0	1	31	118	195	A
392	CFAFFPLSLYLC	0	19	562	792	195	0
394	CLILPLFPFFIC	0	0	110	306	194	A
396	CSFLPVYPFFIC	0	0	6	113	194	A
395	CLILPSFPYFIC	0	0	29	126	194	A
397	CLMLSFLPFNIC	0	0	52	147	191	A
398	CVSFYACFPLMC	0	0	162	461	191	C
399	CLFLSVFPYFIC	0	8	290	585	190	A
401	CLYLPVFPFFAC	0	0	154	518	189	A
400	CLILPFLPYNIC	0	0	4	74	189	A
402	CLFLPVYPFFTC	0	0	8	125	187	A
403	CLIIPVFPFLVC	0	0	23	162	187	A
404	CLILPIFPYLVC	0	1	14	118	186	A
405	CFTHFHVLWPLC	0	3	200	600	185	B
406	CLIIPVFPLYC	0	0	24	248	185	A
407	CLMLSWPYSSIC	0	0	89	310	185	A
409	CLVLPVYPFFVC	0	0	69	226	184	A
410	CVIIPVFPFFIC	0	0	26	213	184	A
408	CFSFYACFPLHC	0	1	181	442	184	C
411	CRFLPIWSLLLC	0	47	1003	1103	181	0
412	CLMLPFLPYFIC	0	0	1	48	179	A
413	CLMFQPFYSNVC	0	0	78	331	178	E
414	CLMLSWPYFNIC	0	0	72	234	178	A
415	CLVLPTFPFFVC	0	1	172	418	178	A
416	CLMLSFLPYNIS	0	0	46	166	177	A
417	CFPLVAYRLLLC	1	63	817	990	176	0
418	CLFLPVHPFFIC	0	0	7	84	176	A
419	CLFLPVLPFFVC	0	0	131	403	176	A
421	CLKLSFLPYNIC	0	0	31	173	174	A
420	CISFMVCFPFLC	1	7	561	773	174	C
422	CFIRWDMLWPFC	0	0	135	432	173	B
423	CFKYFHILWPFC	0	0	37	135	173	B
424	CLILSWPYSNIC	0	0	71	266	173	A
425	CLIIPVYPFFVC	0	0	14	120	172	A
426	CCFSFFACFLTC	1	14	499	665	170	C
427	CLMLSWPHSNIC	0	0	78	324	170	A
428	CFQYFHILWSFC	0	0	68	214	168	B
429	CLFLPVFPLFVC	0	3	119	357	168	A
430	CLFLPVYPSFIC	0	0	7	109	168	A
431	CLILPIFPFLIC	0	0	41	191	168	A
432	CLIIPLFPFFIC	0	0	28	121	167	A
433	CLIIPVFTFFIC	0	0	27	122	165	A
434	CLLLSFLPYNIC	0	0	44	143	165	A
435	CLIIPVFPFFIR	0	0	34	120	163	A
436	CLFLPVYPFSIC	0	0	5	121	162	A
437	CLVLPLFPFLIC	0	0	149	384	162	A
438	CPWAFTIFRFCC	0	2	286	517	162	L
439	CFLYFHILWPFC	0	0	53	205	161	B
440	CLMLSWPYSNSC	0	1	123	373	161	A
441	CLLLPLFPWFAC	0	2	163	544	160	A
443	CLILAIFPYFIC	0	0	20	96	159	A
442	CFSFYACFPLCC	0	2	132	367	159	C
444	CLILPIYPFFIC	0	0	1	47	158	A
445	CLFLPVSPFFVC	0	0	118	385	157	A
447	CLVLPILPFFVC	0	0	156	412	157	A
446	CLIIPVFPLLC	0	0	23	182	157	A
448	CLFLPVFPYWHC	0	1	119	465	156	A
449	CLILPLFPFLIC	0	1	111	328	156	A
450	CLILPTFPYFVC	0	0	16	114	156	A
451	CLVLPIFPLFVC	0	2	148	455	156	A
452	CMSFYACFLSLC	0	18	382	583	156	C
454	CLMLFFLPYNIC	0	0	38	174	155	A
455	CLYLPVFPFLIC	0	0	46	188	155	A
453	CHFLPFLLVPFC	0	22	436	614	155	D
457	CLFLPVCPFFVC	0	1	96	259	152	A
458	CLILRIFPYFIC	0	0	17	79	152	A
459	CPVLPIFPFFVC	0	0	132	366	152	A
456	CGFLPFLLVPWC	0	16	903	894	152	D
460	CFTHWDMLWPIC	0	0	13	167	151	B
461	CLIIPTFPWILC	0	0	121	321	150	A
462	CLILPIFPYCIC	0	0	23	155	149	A
463	CLMLSWPYSDIC	0	0	81	277	149	A
464	CSFLPVFPFFVC	0	0	86	282	149	A
465	CFQYFHILWPFY	0	0	54	168	148	B
467	CLSLPVFPFFVC	0	0	107	291	147	A
466	CLMLSFLPNNIC	0	0	28	176	147	A
468	CLVLPIFPFLIC	0	0	12	126	146	A
469	CLILPIVPYFIC	0	0	22	105	145	A
470	CTFGICFFYAC	1	11	657	757	143	0
471	CCFMPVPFVLLC	0	35	551	686	142	0
472	CLIIPIFPWIMC	0	1	100	239	142	A
473	CVSFYACFPLVC	0	0	53	306	142	C
474	CLIIPVFPFFIF	0	0	24	82	141	A
475	CLIIPVLPFFVC	0	0	12	104	141	A
476	CLILPIFPYIC	0	0	8	108	141	A
478	CLMLPVYPFHIC	0	0	60	323	140	A
477	CLFLPAFPFFVC	0	2	114	305	140	A
479	CIFLPLFPYFVC	0	10	415	576	139	A
480	CWPMIYWSLLLC	0	47	586	726	139	0
481	CICFTSRCIC	0	12	268	480	138	0
482	CLVFAYSGLMSC	0	21	550	652	138	F
483	CLVPPIFPFFVC	0	1	133	363	138	A
484	CLVLSWPYSNIC	0	0	56	239	137	A
485	CIRLNLLLPYTC	0	2	59	259	136	H
486	CLMLPVYPFLLC	0	1	71	326	136	A
487	CLMLSWPYSNNC	0	0	64	348	136	A
491	WLILPIFPYFIC	0	0	6	60	135	A
490	CLILPIFPYFAC	0	0	12	151	135	A
489	CLFLPVFPFSVC	0	1	94	297	135	A
488	CFMLSWPYSNIC	0	0	69	230	135	A
494	CLVLPVYPFFIC	0	0	3	57	134	A
492	CLILPILPYFVC	0	0	7	74	134	A
493	CLILPMFPYFIC	1	0	18	109	134	A
496	CLILPLFPYFIC	0	0	11	95	133	A
497	CLLIPFLPRNIC	0	30	787	803	133	A
495	CLFLPVLPYWLC	0	0	190	461	133	A
498	CLSLPIFPYFIC	0	0	12	89	132	A
499	CLVLPIFPFSVC	0	0	125	322	131	A
500	CLWHRAWSYNIC	0	0	26	216	131	K
504	CLMLSILPYNIC	0	0	25	111	130	A
505	CRFLYFPLWYLC	1	14	590	634	130	0
503	CLMLSFLHYNIC	0	0	39	98	130	A
502	CLILPLYPYLLC	1	12	711	744	130	A
501	CLFLPCFPFFVC	0	24	503	718	130	A
506	CFFHPYSFVVFC	1	11	296	398	129	0
507	CLMLPVFPFLIC	0	0	43	155	129	A
508	CLMLSFFPYNIC	1	1	16	107	129	A
509	SLMLSFLPYNIC	0	0	21	103	129	A
512	CLVLPISPFFVC	0	1	144	351	127	A
513	CYVWRQMLPC	0	2	145	509	127	J
514	CYVWRQMLRC	0	0	65	365	127	J
511	CLSLPVFPYWLC	0	0	148	397	127	A
510	CLIIPVFPFVIC	0	0	19	110	127	A
517	CLMLSWPYTNIC	0	1	61	178	126	A
518	CMFLPFLLMPIC	0	2	19	189	126	D
516	CLMLPFLPYNVC	0	0	4	71	126	A
515	CLFLPVSPYWLC	0	0	178	357	126	A
520	CLMLSFLTYNIC	0	0	28	101	125	A
519	CLIIPVFPWILC	0	0	63	181	125	A
521	CLFLPAFPYWLC	0	1	149	379	123	A
522	CFHLPYLLIPFC	0	16	302	523	122	D
523	CLIIPGFPFFIC	0	0	19	91	122	A
527	CLIIPAFPFFVC	0	0	4	83	121	A
526	CLFPPVFPYWLC	0	0	189	476	121	A
525	CLFLPVFPSFVC	0	2	78	295	121	A
524	CLFLPIYPFFVC	0	1	44	210	121	A
529	CLFQPVYPFFVC	0	0	56	198	119	A
530	CLILPIYPFFVC	0	0	15	86	119	A
531	CLMLSFLPSNIC	0	0	17	106	119	A
532	CLVLPIFPSFVC	0	0	125	301	119	A
528	CFIHWEMLWPFC	0	0	88	253	119	B
533	CLFIPVYPFFVC	0	0	48	233	118	A
534	CLIIPVFPYWIC	0	0	5	32	118	A
535	CLILPICPYFIC	0	0	18	100	118	A
536	CRIIPVFPFFIC	0	1	25	106	118	A
537	CFQYFLILWPFC	0	0	49	174	116	B
540	CLTLPVFPYFIC	0	0	10	72	115	A
538	CFMLSFLPYNIC	0	0	25	113	115	A
539	CLILPVLPYFIC	0	0	17	61	115	A
542	CLIIPVFPLFVC	0	0	8	86	114	A
541	CFQYFYILWPFC	0	0	41	154	114	B
543	CLFLPVYPFFVY	0	0	55	181	113	A
545	CLMLPFPYYIIC	0	24	391	466	113	A
546	CPFLPVFPYWLC	0	0	124	352	113	A
547	CVSYLACFPWTC	0	1	112	297	113	C
544	CLIIPVFPCFIC	0	0	16	110	113	A
550	CLFLPVYPFYVC	0	0	44	184	112	A
551	CLIIPVCPFFIC	0	0	15	97	112	A
553	CQYLPFLLIPCC	0	5	87	261	112	D
549	CIQYFHILWPFC	0	0	39	181	112	B
548	CCFYLFPYFFYC	0	11	446	499	112	0
552	CLILPLFPYFLC	0	3	280	450	112	A
554	CLFLSVYPFFVC	0	0	44	167	111	A
555	CLIIPVFPYYIC	0	0	26	63	111	A
556	CCFSFYFCPIIC	0	0	27	153	110	C
557	CLMLQPFYSNIC	0	2	156	239	110	E
558	CPWIFSDYSFIC	0	0	19	181	110	G
559	CLIIPIFPWTLC	0	0	107	205	109	A
560	CLIIPVSPFFVC	0	0	11	78	109	A
561	CLFLPVFPWFVC	0	0	32	144	108	A
564	CLPWFILRSVAC	0	1	174	459	107	M
565	CLTLPIFPYFVC	0	0	3	85	107	A
563	CLIMPVFPFFIC	0	0	16	84	107	A
562	CFQYFHIHWPFC	0	0	35	143	107	B
566	CIFLPLFPYFIC	0	0	18	93	106	A
567	CLFLPVYPYFLC	0	3	334	428	106	A
568	CLIIPIFPFFVC	0	0	39	88	106	A
569	CFIHWDMLWLIC	0	0	0	76	105	B
570	CFQYFNILWPFC	0	0	27	101	105	B
571	CFQYYHILWPFC	0	0	27	114	105	B
572	CLYLPIFPYFIC	0	1	12	92	105	A
579	CVSYLACFPWAC	0	0	96	279	104	C
578	CLYLPVYPFFVC	0	0	49	226	104	A
577	CLILPIFRYFIC	0	0	10	53	104	A
576	CLIIPIFPWISC	0	0	112	373	104	A
575	CLFSPVFPFFVC	0	0	92	243	104	A
574	CLFLPVYPFFFC	0	0	37	190	104	A
573	CFQYFHFLWPFC	0	0	63	157	104	B
580	CLMLSWPCSNIC	0	0	50	213	103	A
581	CLSIPVFPFFIC	0	0	9	80	103	A
582	CRFLPFLLQPIC	0	0	26	202	103	D
583	CVSYLACFPLYC	0	0	19	141	103	C
584	CLILPIFPDFIC	0	0	17	71	102	A
585	CLVLPVFPYFIC	0	0	11	75	102	A
588	CLMLSFLPYHIC	0	1	21	80	101	A
589	CLVIPIFPWILC	0	0	100	209	101	A
587	CLMLPVYPYLIC	0	0	27	117	101	A
586	CFSNILAFVFSC	0	8	239	377	101	0
590	CFQYFHILCPFC	0	0	27	110	100	B
591	CLFLPVLPFFIC	0	0	5	67	100	A
592	CLIIPVFPFCIC	0	0	17	96	100	A
593	CTFGICFTFSFC	0	12	297	413	100	0
594	CLIIPILPWILC	0	0	86	248	99	A
595	CLFLPVYPFYIC	0	0	1	33	98	A
596	CLRLSFLPYNIC	0	0	15	83	98	A
601	CLYLPVFPFFRC	0	0	53	216	97	A
600	CLVLEYSRLVSC	0	2	277	495	97	F
598	CIFCHSFCSVFRC	0	7	32	278	97	0
597	CFIHWDLLWPFC	0	0	83	181	97	B
599	CLMLAFLPYNIC	0	0	18	73	97	A
602	CFIHWDMLWSFC	0	0	55	189	96	B
603	CFSFYACFPLLC	0	0	36	134	96	C
604	CLILPAFPYFIC	0	0	10	58	96	A
605	CLILPVFPYFMC	0	0	13	104	96	A
606	CLILWPFC	0	0	4	26	96	B
607	CLMLSWPFC	0	0	16	129	96	A
608	CLMVSFLPYNIC	0	0	12	76	96	A
612	CPILPIFPYFVC	0	0	8	67	94	A
611	CLMLFWPYSNIC	0	0	25	111	94	A
609	CFTHFHVLWPSC	0	0	59	260	94	B
610	CLLLPLFPWFLC	0	0	63	219	94	A
613	CFIHWDMLWLFC	1	0	71	225	93	B
614	CLFLPVCPFFIC	0	0	3	44	93	A
615	CLILPIFAYFIC	0	1	11	43	93	A
616	CLLLPLFPFFVC	0	0	64	203	93	A
617	CLMLPVCPFLIC	0	1	59	188	93	A
618	CTFLLFYSDLSC	0	16	325	442	93	0
623	CLMIPVFPFFIC	0	0	8	72	92	A
625	FLIIPVFPFFIC	0	0	18	68	92	A
624	CMMLPVFPFIIC	0	1	105	235	92	A
622	CLLMPFPYSFVC	0	14	302	497	92	0
621	CLIIPISPWILC	0	1	87	182	92	A
620	CLIIPIFPWIWC	0	0	65	243	92	A
619	CLFLPVFPYRLC	0	1	145	364	92	A
626	CFQYFHILWQFC	0	0	31	94	91	B
627	CFQYIHILWPFC	0	0	23	133	91	B
628	CLMLSFLPYNIF	0	0	11	57	91	A
629	CFLAFHYLWPIC	0	0	18	144	90	B
630	CLFLPVFPLFIC	0	0	4	59	90	A
631	CLFLPVYSFFVC	0	0	35	143	90	A
632	CLILPISPYFVC	0	0	5	72	90	A
635	CLIFTYSKLLPC	0	1	54	209	89	F
637	CLILPVYPYFIC	0	0	2	25	89	A
636	CLIHWDMLWPIC	0	0	5	92	89	B
634	CFYFGYHLAPC	0	8	181	258	89	0
633	CFIHWVMLWPFC	0	1	125	206	89	B
638	CLFLPVFPYWVC	0	0	76	159	88	A
639	CLIIPVFPSFVC	0	0	6	61	88	A
640	CLTIPVFPFFVC	0	0	4	73	88	A
641	CPIIPVFPFFVC	0	0	5	73	88	A
642	CQYLPFLLTPFC	0	0	88	210	88	D
643	CWPLQPWRLMSC	0	22	632	796	88	0
646	CLMLTWPYSNIC	0	0	29	111	87	A
644	CLFLPYNIC	0	0	3	75	87	A
645	CLIPPIFPYFVC	0	0	11	68	87	A
647	CFFHWDMLWPFC	0	0	45	130	86	B
648	CLMLPSLPYNIC	0	0	8	47	86	A
649	CLMLSWPYNIC	0	0	1	84	86	A
650	CLVLPIFPFFGC	0	1	32	206	86	A
658	CLMLSWSYSNIC	0	0	39	128	85	A
660	CQYLPSLLIPFC	0	1	76	209	85	D
661	CVSYLACFPWIC	0	1	8	96	85	C
656	CLIVPIFPYFIC	0	0	8	57	85	A
657	CLMLPWLSSHMC	0	1	71	244	85	A
659	CLYLPVFPFFPC	0	0	66	263	85	A
655	CLITPVFPFFVC	0	0	6	103	85	A
653	CLIIPVFRFFIC	0	0	7	68	85	A
652	CFQYFHIIWPFC	0	0	25	102	85	B
651	CFQNYLMYLIIC	0	0	10	71	85	0
654	CLILPIFPYFIW	0	0	7	41	85	A
662	CLIIPVFPFC	0	0	5	65	84	A
663	CLILPIFPHFVC	0	0	6	61	84	A
664	CLYLPVFPFLVC	0	1	139	298	84	A
665	CLYLPVYPFFIC	0	0	5	45	84	A
668	CLILPVFPYYIC	0	0	3	46	83	A
670	CQLFFYPAFWFC	0	14	384	413	83	0
669	CMFLPVYPFFVC	0	0	39	170	83	A
667	CIFLPIFPYFIC	0	0	6	39	83	A
666	CGSLPFLLMPFC	1	12	256	350	83	D
671	CLILPVFPHFIC	0	0	6	48	82	A
672	CLMLSFLPYNIR	0	0	19	94	82	A
673	CLSFYACFPLYC	0	2	115	236	82	C
674	CLVLPLLPFFIC	0	0	85	188	82	A
675	CFQNYLLFLPLC	1	16	215	300	81	0
676	CLALPIFPFFVC	0	3	89	228	81	A
677	CLIPVFPFFIC	0	0	9	51	81	A
678	CLMFSFLPYNIC	0	0	29	73	81	A
679	CLMLYFLPYNIC	0	0	17	68	81	A
680	CLSFLACFPNFC	0	12	332	419	81	C
681	CLYLPVFPFFGC	0	0	64	218	81	A
684	CLILPVFPYWLC	0	1	72	162	80	A
685	CLSLPVFPFFIC	0	0	6	57	80	A
686	CSYMLLPLFFLC	0	31	697	503	80	0
683	CLILPIFPFLLC	0	0	90	210	80	A
682	CFRFFSLLWPLC	0	0	90	277	80	B
687	CFQNFHILWPFC	0	0	21	90	79	B
689	CLILPIFPYSVC	0	0	6	53	79	A
690	CLISPVFPFFIC	0	0	11	70	79	A
691	CLLCSLLPYFTC	0	15	375	332	79	A
692	CLLPMLNLLFSC	0	13	399	471	79	0
693	CPFLYNFSWLVC	1	20	277	420	79	0
694	CRYLPFLLIPFC	1	0	172	247	79	D
688	CFQYFHNLWPFC	0	0	25	78	79	B
698	CLFLPVYPFIVC	0	0	42	109	78	A
700	CQYLPLLLIPFC	0	2	83	219	78	D
699	CMMMMPYQRNLC	0	18	294	453	78	0
696	CLFLLVYPFFVC	0	0	38	140	78	A
697	CLFLPIFPFFVC	0	0	44	157	78	A
695	CCFSYYFCLVPC	0	2	121	219	78	C
705	CLMLPVYLFLIC	0	0	56	197	77	A
708	CYILLTQLLAYC	1	17	769	580	77	0
707	CLYLPVLPFFIC	0	0	20	78	77	A
706	CLMLSWPYSNFC	0	0	30	176	77	A
709	RLFLPVYPFFVC	0	0	28	86	77	A
704	CLLFLFSKMLNC	0	17	253	289	77	F
702	CFIHWDMLWPFY	0	0	82	189	77	B
703	CLFLPVYPIFVC	0	0	23	108	77	A
701	CCFMLYPTLMLC	0	4	187	303	77	0
711	CLIIPVLPYFIC	0	0	4	15	76	A
710	CLFLPVSPFFIC	0	0	6	63	76	A
712	CFLCLPMFFLPC	0	2	118	200	75	I
714	RFQYFHILWPFC	0	0	26	94	75	B
713	CLVPPLFPFFIC	0	0	67	176	75	A
715	CFIHWDMLWPPC	0	0	54	212	74	B
716	CFQYFHILWTFC	0	0	13	74	74	B
717	CLILAPQYPNAC	0	1	74	241	74	E
718	CLILPVSPYFIC	0	0	9	59	74	A
721	CLMSPFLPYNIC	0	0	7	49	73	A
722	CVRLNLLLPYIC	0	0	42	178	73	H
720	CLILPVFPYSIC	0	0	3	61	73	A
719	CLFLPVFPHWLC	0	0	80	249	73	A
724	CFHYFAFLWPFC	0	11	140	242	72	B
725	CFILPVFPYLIC	0	2	124	194	72	A
726	CLFLPVFPFFDC	0	0	38	187	72	A
727	CLIIPVFPFSVC	0	0	2	51	72	A
728	CLITPIFPWILC	0	2	77	193	72	A
729	CLVIPVFPFFVC	0	0	1	36	72	A
730	CLYLPVFPLFVC	0	0	80	211	72	A
731	CQYSPFLLIPFC	0	0	58	190	72	D
723	CAFYFPFSLYVC	0	11	282	343	72	0
734	CVSFYACLPLLC	0	0	86	175	71	C
736	CWMLSFLPYNIC	0	0	15	77	71	A
735	CVSLYACFPLLC	0	2	80	208	71	C
733	CLLFLLPYFIC	0	0	17	125	71	0
732	CFQYFHILLPFC	0	0	17	61	71	B
737	CFVFTFSRLLFC	0	0	21	104	70	F
738	CIRLNLLPPYIC	0	1	41	144	70	H
739	CIRLNSLLPYIC	0	0	61	142	70	H
740	CLFLPVFPFFMC	0	0	8	80	70	A
741	CLIIPVFPFFGC	0	0	9	43	70	A
742	CLILPVFPYFTC	0	0	11	87	70	A
743	CLMLPVYPFLNC	0	2	71	277	70	A
744	CQYLPFLPIPFC	0	1	65	174	70	D
745	CTRLNLLLPYIC	0	0	33	107	70	H
750	CLYLPAFPFFVC	0	0	69	164	69	A
753	CWPMTWWRLILC	0	30	476	571	69	0
752	CMFLPVYPFFIC	0	0	3	30	69	A
751	CMFLPFLLMPLC	0	1	42	173	69	D
749	CLYFSECVLLLC	0	0	50	103	69	0
748	CLIIPIFPRILC	0	2	91	169	69	A
747	CLFLPIYPFFIC	0	0	3	36	69	A
746	CISFYACFPLLC	0	0	60	151	69	C
754	CLMLSWPYSYIC	0	0	19	112	68	A
755	CLVLPLFPFFTC	0	0	67	219	68	A
756	CLYLPVFPYWLC	0	0	84	163	68	A
757	CPWLFTRFSFFC	0	1	95	205	68	G
758	CSFLPVFPFFIC	0	0	1	45	68	A
759	CYVWRRMLLC	0	0	134	236	68	J
764	CLVLPLFPLFIC	0	0	64	150	67	A
767	CYIHWDMLWPFC	0	1	57	142	67	B
766	CVSFYACFPPLC	0	1	74	182	67	C
765	CSMLPFLPYNIC	0	0	3	37	67	A
760	CFQYFHILWPPC	0	0	14	94	67	B
763	CLPWFILRSVMC	0	1	137	286	67	M
761	CFRFFPLLWPFC	0	0	117	243	67	B
762	CLIIPIFPWVLC	0	1	65	165	67	A
773	CLILPLFPYAIC	0	1	72	128	66	A
778	CPVLPLFPFFIC	0	1	55	159	66	A
777	CMFLPFLLMPYC	0	0	91	188	66	D
776	CLVLPPFPFFIC	0	2	68	223	66	A
774	CLLLPLFPWFGC	0	0	84	259	66	A
775	CLLLPVFPYWIC	0	0	13	60	66	A
772	CLFLPVFLFFVC	0	0	35	132	66	A
771	CHMLSWPYSNIC	0	0	33	102	66	A
770	CFSFYACLPLYC	0	0	51	128	66	C
769	CFQYFHIFWPFC	0	0	22	85	66	B
768	CFILPIFPYFVC	0	0	1	33	66	A
785	CLVLPIFPWFVC	0	0	13	80	65	A
790	CYQYFHILWPFC	0	0	20	90	65	B
789	CVSYLACLPWSC	0	0	74	192	65	C
788	CRFLHPFGLYIC	0	0	28	140	65	0
787	CLYLPVFPLFIC	0	0	12	63	65	A
786	CLWHRAWSYYVC	0	0	29	156	65	K
779	CFILPVFPYFIC	0	0	2	39	65	A
784	CLMLSFLPYNLC	0	0	20	113	65	A
782	CLLLPIFPYFIC	0	0	8	71	65	A
781	CLILPIFPFFPC	0	0	42	173	65	A
780	CFTHFHVLWPIC	0	0	26	133	65	B
783	CLMLPFLPYNTC	0	0	6	69	65	A
795	CLIIAVFPFFIC	0	0	7	38	64	A
799	CSYMLFWIC	0	1	18	133	64	0
798	CLYLPVLPFFVC	0	0	80	220	64	A
796	CLMLSWPYSIIC	0	1	39	113	64	A
797	CLYLPVFPYFVC	0	0	33	96	64	A
794	CLFQPVYPFFIC	0	0	2	31	64	A
793	CLFLPAFPFFIC	0	0	5	66	64	A
792	CFTHWDMLWPLC	0	0	24	127	64	B
791	CCFSFVACFPC	0	14	164	259	64	C
800	CLALPLFPFFIC	0	0	36	119	63	A
801	CLFLPVFPSFIC	0	0	4	54	63	A
802	CLILCFSKLMSC	0	12	188	250	63	F
803	CLILPTFPYLIC	0	1	10	46	63	A
804	CLLLPTFPFYVC	0	11	233	275	63	A
809	CLMLPVYPFLFC	0	0	43	239	62	A
811	CRFLPFLLQPYC	0	0	100	165	62	D
810	CPWLFSPFMFIC	0	0	24	132	62	G
812	FLMLSFLPYNIC	0	0	7	49	62	A
808	CLIPPVFPYFIC	0	0	6	56	62	A
806	CFSLYACFPLYC	0	0	58	140	62	C
805	CFAFFPLSLFLC	0	12	193	277	62	0
807	CLIIPVFAFFIC	0	0	6	26	62	A
817	CLMLPFLPYNMC	0	0	7	78	61	A
821	CVMLSFLPYNIC	0	0	11	77	61	A
820	CTFGLCFSLVSC	0	16	190	225	61	0
819	CLYPPVFPFFVC	0	0	59	185	61	A
818	CLMLPFSPYNIC	0	0	2	36	61	A
816	CLFLSVYPFFIC	0	0	2	25	61	A
815	CLFLPVYPFFIY	0	0	1	22	61	A
814	CLFLPVNPFFVC	0	0	29	119	61	A
813	CIIHWDMLWPFC	0	0	49	115	61	B
829	CLMLPWLSSHVC	0	0	28	144	60	A
834	CPYLPVFPFFVC	0	0	77	213	60	A
833	CPWLFTQFAFWC	0	0	49	95	60	G
832	CPILPVFPYFIC	0	0	5	46	60	A
831	CLYLPVSPFFVC	0	0	62	164	60	A
830	CLVLPLFPSFIC	0	1	55	115	60	A
823	CIPFWILLSLHC	0	13	193	239	60	0
828	CLMFQPLYSNIC	0	0	58	104	60	E
827	CLLLPVYPFLIC	0	0	36	107	60	A
826	CLLLPPFPWFVC	0	1	70	189	60	A
825	CLILPIFPYWLC	0	0	30	68	60	A
824	CLFLPCFPFFIC	0	1	27	136	60	A
822	CFIHWDMHWPFC	0	1	38	123	60	B
839	CLMLPFLPHNIC	0	0	2	37	59	A
841	CLMLSWLYSNIC	0	0	26	105	59	A
840	CLMLPLLPYNIC	0	0	10	53	59	A
836	CFIHCDMLWPFC	0	0	41	150	59	B
838	CLFLPVYLFFVC	0	0	16	103	59	A
835	CCWSFYACFFGC	1	16	370	300	59	C
837	CFSFYACFPSYC	0	0	76	162	59	C
846	CLIIPVFPYLIC	0	0	6	31	58	A
849	CLVLPVFPFLIC	0	0	12	54	58	A
848	CLVLPLSPFFIC	0	0	52	151	58	A
847	CLMLSWPYSNIY	0	0	39	118	58	A
850	CPWALTIFRFWC	0	1	93	147	58	L
845	CLFLPVFPYWMC	0	0	25	138	58	A
844	CFQYFHILWPFS	0	0	31	91	58	B
843	CFPYFIC	0	0	1	20	58	A
842	CFIHFSFLWPLC	0	2	31	157	58	B
851	CALFPFPYFIC	0	0	11	103	57	0
852	CFFWLVPFC	0	12	124	184	57	0
853	CLILAPQYPNMC	0	1	44	162	57	E
854	CLILPIYPYFVC	0	0	1	20	57	A
855	CQHLPFLLIPFC	0	0	96	200	57	D
856	CQMLPVYPFLIC	0	0	38	109	57	A
861	CLMWSFLPYNIC	0	0	13	72	56	A
865	YFQYFHILWPFC	0	0	24	63	56	B
864	SFQYFHILWPFC	0	0	12	71	56	B
862	CLTIPIFPWILC	0	0	56	155	56	A
863	CSSFYACFPLYC	0	0	59	118	56	C
860	CLIIPAFPYFIC	0	0	0	18	56	A
859	CLFSPVFPFFIC	0	0	2	47	56	A
858	CLFLPVFPFSIC	0	0	5	42	56	A
857	CFTNFPLLWPFC	1	21	141	221	56	B
881	CSIIPIFPWILC	0	0	63	139	55	A
880	CLYLPVSPFFIC	0	0	10	63	55	A
879	CLYLPVFPFLLC	0	0	53	132	55	A
878	CLYFSECVFAVC	0	0	17	94	55	0
877	CLMLSWPYSKIC	0	0	33	108	55	A
876	CLMLSFLPYIC	0	0	5	56	55	A
875	CLMLPVYPYFIC	0	0	2	22	55	A
874	CLIIRVFPFFIC	0	0	5	41	55	A
873	CLIIPVFPFFPC	0	0	6	64	55	A
872	CLIIPVFPFFIL	0	0	10	24	55	A
871	CLFLPVFPFFTC	0	0	4	59	55	A
870	CIFIPVFPFFIC	0	0	1	17	55	A
869	CGFILFAQLMAC	0	10	190	236	55	0
868	CFQYFHILWPC	0	1	19	109	55	B
867	CFIHWDMFWPFC	0	0	55	121	55	B
866	CFIHWDKLWPFC	0	0	49	131	55	B
888	CLVLPIFLFFVC	0	0	34	124	54	A
892	CVSFYACSPLLC	0	1	64	166	54	C
891	CVSFYACFPLYC	0	0	44	106	54	C
890	CLYLPVFPFSVC	0	1	65	135	54	A
889	CLVLPLFPFSIC	0	0	52	135	54	A
887	CLFLPVYTFFVC	0	0	22	71	54	A
882	CASFYACFPLLC	0	0	48	132	54	C
885	CIRLNLLLPHIC	0	1	14	94	54	H
884	CFINWDMLWPFC	0	0	54	109	54	B
883	CFIHWDMLWHFC	0	0	44	105	54	B
886	CLFLPVYPFFSC	0	0	7	58	54	A
898	CLMLPIFPFFVC	0	0	49	118	53	A
901	GLILPIFPYFIC	0	0	3	33	53	A
900	CVSSYACFPLLC	0	0	55	136	53	C
899	CLMLSVYPFLIC	0	0	23	104	53	A
897	CLMHSWPYSNIC	0	0	26	91	53	A
896	CLMFQPFYSNTC	0	1	31	108	53	E
895	CLFLPVYHFFVC	0	0	25	72	53	A
894	CFIHWDMLCPFC	0	0	35	116	53	B
893	CFIHFSLLWPFC	0	3	53	137	53	B
907	CLLLPLFPWSVC	0	1	56	156	52	A
912	CVSYPACFPWSC	0	0	69	171	52	C
910	CPPPPC	235	249	393	498	52	C
908	CLVLPFLPYNIC	0	0	5	26	52	A
911	CQYLPFPLIPFC	0	0	51	156	52	D
906	CLLLPLFPWLVC	0	2	153	266	52	A
902	CFHYFHILWPFC	0	0	10	46	52	B
905	CLIIPIFPFFIC	1	0	2	23	52	A
909	CLVLPLYPFFIC	0	0	29	63	52	A
903	CLFLPDYPFFVC	0	0	24	80	52	A
904	CLFVPVFPFFIC	0	3	94	142	52	A
921	CYVWRQMLFC	0	0	37	180	51	J
918	CLWHRAWSYYTC	0	1	50	177	51	K
922	WLIIPVFPFFIC	0	0	6	42	51	A
920	CVSYLACSPWSC	0	0	69	173	51	C
919	CVSYLACFPRSC	1	2	62	198	51	C
917	CLVFTFSRLLSC	0	0	39	115	51	F
916	CLLLPLLPWFVC	0	0	93	190	51	A
915	CLIVPVFPFFVC	0	0	1	52	51	A
914	CLIFPCYPYFLC	0	14	127	186	51	A
913	CLFIPVYPYFIC	0	0	5	80	51	A
923	CFIHWDMLWPTC	0	0	8	107	50	B
924	CFQYFPILWPFC	0	0	14	67	50	B
925	CLCLPVFPFFIC	0	0	48	95	50	A
926	CLMFSWPYSNIC	0	1	27	112	50	A
927	CLTHFHVLWPFC	0	0	55	145	50	B
928	CPWLFSQFAFRC	0	2	54	145	50	G
929	CYVWRQMLVC	0	0	22	155	50	J
936	CLMLPVYPFLIY	0	0	31	112	49	A
938	CVSYLARFPWSC	0	0	52	152	49	C
934	CLITPVFPYFIC	0	0	2	17	49	A
935	CLMLLVYPFLIC	0	0	15	80	49	A
937	CMFFHPFSLYIC	0	0	12	102	49	0
933	CLFLPVFLYWLC	0	0	52	146	49	A
930	CFTHLHVLWPFC	0	0	43	130	49	B
931	CFVLPIFPFFVC	0	0	42	120	49	A
932	CISFMVCFPFIC	0	0	13	56	49	C
945	CLMFPFFIC	0	0	1	13	48	A
949	CTIYFPWLWTMC	0	14	130	211	48	0
948	CPYFWPTPFFFC	0	14	396	375	48	0
947	CLMLSFLRYNIC	0	0	8	31	48	A
946	CLMLPVYQFLIC	0	1	20	78	48	A
950	YLFLPVYPFFVC	0	0	16	71	48	A
944	CLIIPVFPLLIC	0	0	9	46	48	A
943	CLIFTYSKLLFC	0	0	22	124	48	F
942	CLFLPVYPFFIS	0	0	0	14	48	A
941	CLFLPVFPFYVC	0	0	39	98	48	A
940	CLFFHPFSLYIC	0	0	25	125	48	0
939	CIRSNLLLPYIC	0	0	27	112	48	H
958	SLFLPVYPFFVC	0	0	16	60	47	A
957	CPWLFTCFSFVC	0	0	32	128	47	G
956	CLYLPVFPSFVC	0	1	52	169	47	A
955	CLTLPFLPYNIC	0	0	6	31	47	A
954	CLILPIFPYFGC	0	0	4	48	47	A
953	CLFLPNWHLYTC	0	0	53	92	47	0
952	CLFLPIFPYFVC	0	0	5	29	47	A
951	CFLLIPHLLWLC	0	8	111	184	47	0
970	CQLLFYPAFWFC	0	1	95	149	46	0
965	CLFLTVYPFFVC	0	0	11	37	46	A
969	CPFLGLFSFVFC	0	16	187	236	46	0
968	CLMHPVYPFLIC	0	0	21	83	46	A
967	CLIIPVSPYFIC	0	0	2	15	46	A
966	CLIIPVFPFLLC	0	0	15	73	46	A
960	CILIAAFPWFIC	0	4	77	163	46	A
964	CLFLPVYPFFVS	0	0	17	86	46	A
962	CIRLNLSLPYIC	0	0	25	118	46	H
961	CIRLNLLLPCIC	0	0	24	42	46	H
959	CFLCLPMFYYPC	0	1	64	195	46	I
963	CLFLPGYPFFVC	0	0	16	84	46	A
978	CLMLPVYPFIIC	0	0	21	80	45	A
983	CPFGFTSFWFWC	0	21	277	274	45	0
982	CLVLPIYPFFVC	0	0	30	91	45	A
981	CLVFWHSIFC	0	10	181	186	45	0
980	CLPLPLFPWFVC	0	0	79	159	45	A
979	CLMLPVYSFLIC	0	0	27	82	45	A
976	CLILAPHYPNVC	0	0	39	113	45	E
977	CLMLPVFPFFVC	0	0	24	106	45	A
975	CLIIPVFLFFVC	0	0	1	38	45	A
974	CFQFFHILWPFC	0	0	17	45	45	B
973	CFLCLPMFYYIC	0	0	14	74	45	I
972	CFLCLPMFFLAC	0	1	54	118	45	I
971	CCFSFYFCPILC	0	1	36	125	45	C
993	CVSHLACFPWSC	0	1	44	106	44	C
992	CLILPTFPYFTC	0	0	4	36	44	A
990	CLILPIFPYLMC	0	0	9	77	44	A
994	CYVWQQMLLC	0	0	55	144	44	J
991	CLILPTFPYFPC	0	0	29	124	44	A
986	CFLCLPMFFLVC	0	0	22	109	44	I
989	CFTHFHVLWPYC	0	0	29	136	44	B
987	CFLCLPMFYYRC	0	0	40	79	44	I
984	CFIHWDMLRPIC	0	0	4	41	44	B
985	CFLAFHYLWPLC	0	0	34	115	44	B
988	CFSFYACSPLYC	0	1	37	113	44	C
1005	CLILPIYPFLIC	0	0	9	36	43	A
1013	RLFLPVYPFFIC	0	0	1	10	43	A
1012	RFIHWDMLWPFC	0	0	49	62	43	B
1011	CRFLPFLLQPVC	0	0	8	68	43	D
1010	CRFLPFLLQPLC	0	2	50	154	43	D
1009	CLTLPIFPYLIC	0	0	7	48	43	A
1008	CLMLPLFPFFIC	0	0	35	81	43	A
1007	CLMLPFLPYSIC	0	1	3	34	43	A
1006	CLILPVFPYFLC	0	0	3	31	43	A
1004	CLILPIFPSFIC	0	0	9	39	43	A
1003	CLFLPVYTFFIC	0	0	1	7	43	A
1002	CLFLPNWHLYPC	0	0	31	84	43	0
1001	CISYLACFPWSC	0	0	41	150	43	C
1000	CFVSFSVLWPIC	0	0	4	55	43	B
999	CFRFFSLLWPSC	0	0	41	125	43	B
998	CFILWDMLWPFC	0	0	37	114	43	B
997	CFIIPVFPFFVC	0	0	5	32	43	A
996	CFIHWDMLWPMC	0	0	7	92	43	B
995	CCFSFYYCLLSC	0	2	128	141	43	C
1020	CLMLCFLPYNIC	0	0	14	27	42	A
1024	CYVWRQMPLC	0	0	63	181	42	J
1023	CLYLPVFPFFTC	0	0	19	65	42	A
1022	CLYLPAFPFFIC	0	0	16	66	42	A
1021	CLVLPIFPVLVC	0	10	127	182	42	A
1017	CLILPILPYLIC	0	0	9	42	42	A
1019	CLMFQPFYSNMC	0	0	32	158	42	E
1018	CLIPPIFPYLIC	0	0	4	33	42	A
1014	CASYLACFPWSC	1	0	48	152	42	C
1016	CFLCLPMFYYHC	0	0	57	140	42	I
1015	CFAFFDVLWPFC	0	0	21	56	42	B
1038	SLMLSWPYSNIC	0	0	11	39	41	A
1037	GLIIPVFPFFIC	0	0	5	23	41	A
1036	CSIHWDMLWPIC	0	0	1	46	41	B
1035	CPIIPVFPYFIC	0	0	0	18	41	A
1034	CMFLPVFPFFVC	0	0	20	75	41	A
1033	CLYLPVFPFSIC	0	0	10	47	41	A
1032	CLVIPVFPYFIC	0	0	0	7	41	A
1031	CLMLPFLPCNIC	0	0	0	15	41	A
1030	CLFLPVYSFFIC	0	0	0	30	41	A
1029	CHLLPFLLVPFC	0	2	96	158	41	D
1028	CFMHWDMLWPFC	0	1	15	52	41	B
1027	CFIHWDMLLPFC	0	0	39	100	41	B
1026	CFIHRDMLWPIC	0	0	2	44	41	B
1025	CFIHLDMLWPFC	0	1	42	108	41	B
1045	CLLLPLSPWFVC	0	0	80	169	40	A
1050	CSFVHAFSLYVC	0	0	67	121	40	0
1049	CLVLPIFPFFEC	0	0	77	174	40	A
1048	CLMLSWPYSNIS	0	0	28	40	40	A
1047	CLMLSVLPYNIC	0	0	4	56	40	A
1046	CLMLSLPYNIC	0	0	5	38	40	A
1041	CFSFYACFPWYC	0	0	12	33	40	C
1044	CLILPTLPYFIC	0	0	3	24	40	A
1042	CLFLPIFPFFIC	0	0	3	20	40	A
1039	CFRLNLLLPYIC	0	0	14	63	40	H
1040	CFSFYACFPWSC	0	0	21	83	40	C
1043	CLFLPVYPFFVR	0	0	25	59	40	A
1059	CLILPIFPYFIL	0	0	6	13	39	A
1066	CVQYFHILWPFC	0	0	16	39	39	B
1065	CPTPPC	80	65	111	151	39	C
1064	CLYPPVFPFFIC	0	0	14	57	39	A
1063	CLMLSFLPYTIC	0	0	3	49	39	A
1062	CLMLSFLAYNIC	0	0	5	38	39	A
1060	CLKLSWPYSNIC	0	0	11	67	39	A
1061	CLLLPVYPYFIC	0	0	0	12	39	A
1058	CLILPIFPFLVC	0	0	46	105	39	A
1056	CLIIPVYPYFIC	0	0	1	9	39	A
1055	CLIIPIFPYFVC	0	0	2	20	39	A
1054	CLFLPVYLFFIC	0	0	3	24	39	A
1053	CLFLPVFPYLIC	0	0	10	33	39	A
1052	CLFLPVFPCWLC	0	0	47	153	39	A
1057	CLILPIFPFFRC	0	0	23	120	39	A
1051	CFQYFHILWPFR	0	0	19	52	39	B
1082	CLVLPLFPFFMC	0	0	63	222	38	A
1079	CLMLPVYPILIC	0	0	24	79	38	A
1080	CLTIPVFPYFIC	0	0	1	12	38	A
1081	CLVLPIFPWILC	0	0	13	41	38	A
1085	CVSFYACFPILC	0	0	6	64	38	C
1083	CPCLFIFGFPFC	0	7	143	205	38	0
1084	CQLFFYPAFWLC	0	1	104	130	38	0
1077	CLMLPFFPYFIC	0	0	0	18	38	A
1078	CLMLPFLSYNIC	0	0	1	22	38	A
1069	CFIHWDTLWPIC	0	0	8	64	38	B
1076	CLLYFFGTSHVC	0	11	114	158	38	0
1075	CLLLPLFPFLVC	0	0	29	97	38	A
1074	CLIIPVLPFLIC	0	0	6	39	38	A
1073	CLFLPVYPIFIC	0	0	1	13	38	A
1072	CLFLPVYPFFNC	0	0	1	32	38	A
1071	CFSFYACFPLNC	0	0	19	86	38	C
1070	CFIQWDMLWPFC	0	0	33	84	38	B
1068	CFIHWDMLWPFS	0	0	23	91	38	B
1067	CFIHWDMLWHIC	0	0	4	35	38	B
1099	CVSYLACFPLLC	0	0	16	52	37	C
1098	CSLLPLFPWFVC	0	0	65	157	37	A
1093	CLMLSCLPYNIC	0	0	6	58	37	A
1097	CRFLHPFGLYLC	0	0	43	129	37	0
1096	CQYLPFLLVPFC	0	1	47	114	37	D
1095	CLYLPVFPFFHC	0	1	17	80	37	A
1094	CLVLPVFPFLPC	0	1	99	259	37	A
1088	CLFLSVFPFFVC	0	0	24	87	37	A
1092	CLMLPFLPYYIC	0	0	1	20	37	A
1090	CLIHWDMLWPLC	0	0	16	85	37	B
1089	CLIFTYSKLPSC	0	0	29	91	37	F
1087	CLFLLVYPFFIC	0	0	1	20	37	A
1086	CLCLPVFPFFVC	0	1	26	110	37	A
1091	CLIIPVFPFLMC	0	0	3	63	37	A
1109	CLILPIFNYFIC	0	0	4	17	36	A
1117	CYVWRQMLHC	0	0	55	153	36	J
1116	CYFMTLYLC	0	6	97	171	36	0
1115	CPWLFTCFSFLC	0	0	52	184	36	G
1114	CPILPIFPYLIC	0	0	3	33	36	A
1113	CLMLSFLPYLIC	0	0	0	20	36	A
1112	CLMFPVYPFLIC	0	0	26	88	36	A
1111	CLLLPLFPWLIC	0	0	8	51	36	A
1110	CLILPIFPHLIC	0	0	6	30	36	A
1108	CLIIPVFPWFIC	0	0	0	16	36	A
1104	CIRLNLLLPYNC	0	0	15	89	36	H
1101	CFQYFHILWRFC	0	0	9	36	36	B
1102	CFVFTFSRLLYC	0	1	26	80	36	F
1103	CFVHWDMLWPIC	0	0	3	29	36	B
1100	CFNHWDMLWPFC	0	0	34	73	36	B
1105	CLFLPIFPYWLC	0	0	44	112	36	A
1106	CLFLPVFPFYIC	0	0	3	20	36	A
1107	CLHLPVFPFFVC	0	0	39	126	36	A
1127	CLMLSFWPYNIC	0	0	5	42	35	A
1135	YLMLSWPYSNIC	0	0	10	55	35	A
1134	CYAWRQMLLC	0	0	48	127	35	J
1133	CVSFYARFPLLC	0	0	54	156	35	C
1132	CVSFYACFPFLC	0	0	32	78	35	C
1131	CTFGICFRSLAC	0	23	149	144	35	0
1130	CPSLFFHPFLFC	0	15	306	298	35	0
1129	CLVLPIFPYLIC	0	0	4	45	35	A
1128	CLMLSWPYANIC	0	0	7	60	35	A
1119	CFIHWDMPWPIC	0	0	3	50	35	B
1126	CLMLSFLPDNIC	0	0	8	35	35	A
1118	CFIHWDMLWPNC	0	0	18	79	35	B
1124	CLILPIFPYPIC	0	0	4	24	35	A
1123	CLFLPVYHFFIC	0	0	0	10	35	A
1122	CLFLPVFPFIVC	0	0	17	68	35	A
1121	CIRLNLLLPYSC	0	0	17	86	35	H
1120	CIRLDLLLPYIC	0	0	28	72	35	H
1125	CLMFQPFYLNIC	0	1	33	76	35	E
1148	CLPWLILRSVVC	0	1	64	122	34	M
1149	CLVLPIFPLLC	0	0	9	73	34	A
1150	CLWHRAWPYYIC	0	0	40	82	34	K
1154	CVSFYACFPWSC	0	0	10	57	34	C
1151	CMFLPFLLMPVC	0	0	10	80	34	D
1152	CPWAFTIFRFRC	0	0	50	111	34	L
1153	CPYLPVFPFFIC	0	0	6	55	34	A
1146	CLILPVFPFFLC	0	0	37	87	34	A
1147	CLMLPFMPYNIC	0	0	1	19	34	A
1140	CLFLPVFPYWTC	0	0	9	74	34	A
1145	CLILPTFPYFMC	0	0	12	55	34	A
1143	CLIISVFPFFVC	0	0	1	18	34	A
1142	CLIIPVFPFLTC	0	0	9	44	34	A
1141	CLFMPVFPFFVC	0	0	18	61	34	A
1139	CLFLHSFSIYFC	0	8	90	149	34	A
1138	CFIYWDMLWPIC	0	0	2	29	34	B
1137	CFIHWDMLWPRC	0	0	7	56	34	B
1136	CFIHWDMLWPHC	0	0	16	78	34	B
1144	CLILPIFPYLTC	0	0	9	43	34	A
1163	CLLPPLFPWFVC	0	0	78	169	33	A
1170	RLMLSWPYSNIC	0	0	21	84	33	A
1169	CLYLPVFPSFIC	0	0	13	60	33	A
1168	CLYFSECVFVC	0	0	1	51	33	0
1167	CLWHRAWSYYMC	0	0	32	127	33	K
1165	CLPWFILRSVIC	0	0	13	57	33	M
1164	CLMLSFFVC	0	0	6	17	33	A
1166	CLVLPIFPVFVC	0	0	37	70	33	A
1162	CLLLSWPYSNIC	0	0	14	49	33	A
1160	CLILTYSKLLSC	0	1	21	95	33	F
1159	CLILPIFPYYVC	0	0	1	15	33	A
1158	CLILPIFPYFPC	0	0	16	46	33	A
1157	CLFLPVFPFFVY	0	0	32	61	33	A
1156	CFTHFHVLWPVC	0	0	9	55	33	B
1155	CFSFYACFPLSC	0	0	17	80	33	C
1161	CLITPVFPFLIC	0	0	2	19	33	A
1194	CLRHRAWSYYIC	0	0	33	115	32	K
1188	CLLLPLFPRFVC	0	0	60	126	32	A
1189	CLMLPGYPFLIC	0	0	10	38	32	A
1190	CLMLPIYPFFIC	0	0	6	33	32	A
1191	CLMLSFLPYFVC	0	0	0	17	32	A
1192	CLMLSFVPYNIC	0	0	6	47	32	A
1193	CLMPPWLSSHIC	0	0	26	80	32	A
1198	CLYLPIFPFFVC	1	0	22	71	32	A
1195	CLTIPVFPFLIC	0	0	5	33	32	A
1196	CLVLPTFPYFIC	0	0	3	13	32	A
1197	CLWHKAWSYYIC	0	0	19	55	32	K
1199	CYVWRQTLLC	0	0	51	100	32	J
1186	CLIMPIFTYFIC	0	0	3	14	32	A
1200	SFIHWDMLWPFC	0	0	34	54	32	B
1187	CLLFLFSQLLSC	0	3	102	131	32	F
1172	CFQYFHILWPNC	0	0	3	36	32	B
1185	CLIMPIFPYFVC	0	0	0	17	32	A
1177	CLFLPVFPLYC	0	0	12	46	32	A
1184	CLILPVFPYNIC	0	0	0	28	32	A
1171	CCFSFFACFLIC	0	0	11	50	32	C
1174	CFSSYACFPLYC	0	0	39	96	32	C
1175	CIPWFILKAYVC	0	11	183	152	32	M
1176	CLFLPLFPWFVC	0	0	25	70	32	A
1173	CFSFYARFPLYC	0	0	37	133	32	C
1178	CLFLPVFPVFVC	0	0	21	61	32	A
1179	CLFLPVYPFLLC	0	0	8	58	32	A
1180	CLFLPVYPYNIC	0	0	1	25	32	A
1181	CLIIPIYPWILC	0	0	29	78	32	A
1182	CLILAPRYPNVC	0	1	66	145	32	E
1183	CLILPTFPFFVC	0	0	5	40	32	A
1211	CLVPPIFPFFIC	0	0	0	9	31	A
1220	SLFLPVYPFFIC	0	0	2	12	31	A
1219	CYFLEPYFLYFC	0	6	94	144	31	0
1218	CVSFYACFPPFC	0	0	3	49	31	C
1217	CTFLLPFSLWFC	0	9	121	181	31	0
1216	CPSPPC	42	60	76	107	31	C
1215	CPIIPVFPFLIC	0	0	2	24	31	A
1214	CMFLPVFPFFIC	0	0	2	13	31	A
1213	CLYLPVFPLFLC	0	0	27	73	31	A
1212	CLYLPVFPFFMC	0	0	19	100	31	A
1209	CLMLPVYPFLIS	0	0	18	58	31	A
1210	CLMLSWHYSNIC	0	1	14	37	31	A
1205	CFNFLLCPFSLC	0	7	60	116	31	C
1202	CCPLPFLLFWFC	0	8	136	157	31	0
1203	CFLCLPMFFLDC	0	2	50	147	31	I
1204	CFLCLPMFFLIC	0	0	3	33	31	I
1201	CCFSFYACFFPC	0	0	31	58	31	C
1206	CLFCHLLPYFTC	0	6	115	178	31	A
1207	CLIFTYSRLLSC	0	0	21	66	31	F
1208	CLIMPIFHYFIC	0	0	2	6	31	A
1232	CLLLPLFPFLTC	0	0	18	72	30	A
1242	CYALPFPLMLFC	0	0	28	111	30	0
1241	CVSFLACIPYPC	0	3	47	119	30	C
1240	CVMLSWPYSNIC	0	0	13	69	30	A
1239	CPWLFSQFAFSC	0	0	29	107	30	G
1238	CPMFQPFYSNIC	0	0	10	43	30	E
1237	CLYLPVYPFLIC	0	0	15	72	30	A
1235	CLSLPVFPYWIC	0	0	2	25	30	A
1234	CLMLPWLSSHTC	0	0	29	105	30	A
1233	CLLLSVFPFFVC	1	7	111	118	30	A
1236	CLVFPIFPFFVC	0	0	20	61	30	A
1231	CLLFAFSHLLSC	0	10	117	182	30	F
1226	CLIFTYPKLLSC	0	0	21	74	30	F
1230	CLKLPVYPFLIC	0	0	18	45	30	A
1222	CIRLSLLLPYIC	0	0	16	83	30	H
1223	CLCLPVYPFFVC	0	0	5	40	30	A
1225	CLHLPVFPFFIC	0	0	22	50	30	A
1224	CLFLPVSPYWIC	0	0	5	15	30	A
1227	CLIIPIFPWILY	0	0	28	52	30	A
1221	CFCLWAFHYCSC	0	8	124	162	30	0
1228	CLIIPVFPFFIW	0	0	8	23	30	A
1229	CLIIPVFPFFRC	0	0	2	28	30	A
1265	CLWHRAWSHYIC	0	0	34	73	29	K
1260	CLMLPFLPYDIC	0	0	3	23	29	A
1261	CLMLPFLPYNNC	0	0	1	28	29	A
1262	CLMLPVFPYWLC	0	0	28	56	29	A
1263	CLMMPFLPYNIC	0	0	1	15	29	A
1264	CLVLPIFPFFVY	0	0	47	79	29	A
1271	CYSYMLLHALLC	0	5	109	142	29	0
1266	CMMLPVYPFLIC	0	0	13	35	29	A
1267	CPWFFSQFAFWC	0	2	64	138	29	G
1268	CTIFLPFFWSLC	0	11	149	164	29	0
1269	CVSFHACFPLLC	0	0	15	99	29	C
1270	CVSYLAWFPWSC	0	0	17	75	29	C
1272	YFIHWDMLWPFC	0	0	32	60	29	B
1259	CLMFWPKHTNIC	0	9	74	124	29	0
1258	CLLMPFPYSFIC	0	0	21	56	29	0
1257	CLLLPVFPYFIC	0	0	7	36	29	A
1249	CLIIPVFPFPIC	0	0	3	23	29	A
1243	CFIHWDMLWPC	0	0	9	78	29	B
1256	CLIVPVFPYFIC	0	0	0	8	29	A
1245	CFRSFSLLWPFC	0	1	17	60	29	B
1246	CFRYFHILWPLC	0	0	4	44	29	B
1247	CFTHFHVLWPCC	0	0	19	98	29	B
1248	CLIFPYSRLATC	0	2	93	150	29	0
1244	CFMHFHVLWPFC	0	0	21	42	29	B
1250	CLIIPVFPHFIC	0	0	0	9	29	A
1252	CLILLIFPYFVC	0	0	1	11	29	A
1253	CLILPFLTYHIC	0	0	12	44	29	A
1254	CLILPLFPFFVC	0	0	21	44	29	A
1255	CLILPYNIC	0	0	1	11	29	A
1251	CLIIPVFPWFVC	0	0	11	31	29	A
1292	CLYLPFLLIPFC	0	0	22	61	28	D
1288	CLLIPVYPFFIC	0	1	35	66	28	A
1289	CLQYFHILWPLC	0	0	8	39	28	B
1290	CLTLPTFPYFIC	0	0	5	18	28	A
1291	CLVLPIFPYWLC	0	0	24	57	28	A
1295	CPWLFSQFALWC	0	0	50	80	28	G
1293	CPWAFSIFRFWC	0	1	95	101	28	L
1294	CPWLFSQFAFLC	0	0	37	109	28	G
1296	CVSYLACFPWCC	0	0	17	81	28	C
1297	CWYCYTLLWPFC	0	10	68	114	28	0
1286	CLILPIFPYFIG	0	0	1	28	28	A
1287	CLILSVFPYFIC	0	0	14	19	28	A
1277	CIHLNLLLPYIC	0	0	9	29	28	H
1285	CLILPIFPCFVC	0	0	1	29	28	A
1278	CLFLPVFSYWLC	0	0	30	65	28	A
1284	CLIIPVFPYFTC	0	0	0	10	28	A
1274	CFTHFHILWPFC	0	0	10	43	28	B
1275	CFTHFHMLWPFC	0	0	27	69	28	B
1273	CFQYFHILWAFC	0	0	3	22	28	B
1276	CFVLPVFPFLIC	0	0	31	74	28	A
1279	CLFLPVWPFAIC	0	6	60	131	28	A
1280	CLFMPVYPFFVC	0	0	17	58	28	A
1281	CLIFTYSKLLIC	0	0	4	23	28	F
1282	CLIFTYSKPLSC	0	0	21	60	28	F
1283	CLIIPMFPFFVC	0	0	1	20	28	A
1319	CLMLYWPYSNIC	0	0	12	39	27	A
1314	CLILPISPYLIC	0	0	7	42	27	A
1315	CLIVPIFPWILC	0	0	37	86	27	A
1316	CLMFQPFYSNSC	0	0	12	57	27	E
1317	CLMLSCPYSNIC	0	0	10	59	27	A
1318	CLMLSFWPFC	0	0	11	7	27	A
1325	CYVRRQMLLC	0	0	48	127	27	J
1320	CLTFQPFYSNIC	0	0	15	59	27	E
1321	CLVLLIFPFFVC	0	0	11	59	27	A
1322	CLVLPTFPFFIC	0	0	3	20	27	A
1323	CMLWFTIPFMDC	1	4	70	114	27	0
1324	CVSFYACFPLPC	0	0	38	87	27	C
1312	CLILPIFPYFDC	0	0	2	24	27	A
1313	CLILPIFPYWIC	0	0	0	11	27	A
1326	FFQYFHILWPFC	0	0	11	26	27	B
1311	CLIIPVFPYFMC	0	0	0	12	27	A
1303	CILLPLFPYFVC	0	0	28	64	27	A
1298	CFEYFHILWPFC	0	0	9	14	27	B
1299	CFIHWDILWPIC	0	0	3	37	27	B
1300	CFIHWDVLWPIC	0	0	5	28	27	B
1301	CFIHWNMLWPIC	0	0	4	31	27	B
1302	CFQNYLMYLIGC	0	0	37	73	27	0
1310	CLIIPVFPFHIC	0	0	1	18	27	A
1304	CIRLNLLLPYLC	0	0	10	49	27	H
1306	CLFLPVNPFFIC	0	0	1	22	27	A
1307	CLFLSVFPYWLC	0	0	16	66	27	A
1308	CLFMPVYPFFIC	0	0	1	12	27	A
1309	CLIIPVFPFFC	0	0	9	65	27	A
1305	CLFLPVFPYWSC	0	0	6	40	27	A
1348	CLVLPIFPFYVC	0	0	36	59	26	A
1343	CLMLPWLSSNIC	0	0	7	51	26	A
1344	CLMLPWPSSHIC	0	0	40	74	26	A
1345	CLMLSWTYSNIC	0	0	14	35	26	A
1346	CLMRSWPYSNIC	0	0	10	31	26	A
1347	CLSFMSCFPFVC	0	23	88	139	26	C
1351	CPWAFTILRFWC	0	0	45	87	26	L
1349	CLVLPLFPYFVC	0	0	9	28	26	A
1350	CPWAFTIFRFLC	0	0	33	63	26	L
1352	CPWLLSQFAFWC	0	1	56	102	26	G
1353	CRFLPFLLQPSC	0	0	14	56	26	D
1354	CSFLFEFSMYFC	2	4	70	122	26	0
1342	CLLLPLLPWFIC	0	0	4	27	26	A
1355	YLFLPVYPFFIC	0	0	0	11	26	A
1340	CLILPIFPYFRC	0	0	3	28	26	A
1341	CLLLPLFPFLMC	0	1	35	110	26	A
1332	CFSFHACFPLYC	0	0	22	56	26	C
1327	CCFMLYPTLMFC	0	11	81	119	26	0
1339	CLIITVFPFFVC	0	0	3	19	26	A
1329	CFIHWDMLWTFC	0	0	25	72	26	B
1330	CFIIPVFPYFIC	0	0	1	8	26	A
1331	CFILSVFPYLIC	1	5	89	85	26	A
1328	CFIHFPFLWPFC	0	0	31	68	26	B
1333	CFSHWDMLWPFC	0	0	17	56	26	B
1335	CHVLPIFPFFVC	0	0	28	86	26	A
1336	CLFLPAFPYWIC	0	0	8	23	26	A
1337	CLFPPVFPYWIC	0	0	3	33	26	A
1338	CLIIPVFPFLFC	0	0	5	27	26	A
1334	CFTHSHVLWPFC	0	0	24	101	26	B
1374	CLYSPVFPFFLC	0	0	11	43	25	A
1370	CLMLSLPYSNIC	0	1	22	59	25	A
1371	CLTFTYSKLLSC	0	0	20	51	25	F
1372	CLVLPIFPLFIC	0	0	1	14	25	A
1368	CLLLPLSPWFIC	0	0	2	17	25	A
1377	CSYMLLPLFFIC	0	0	10	52	25	0
1375	CPVLPIFPFFIC	0	0	2	12	25	A
1376	CPWAFTIFRLWC	0	0	41	69	25	L
1378	CVGYLACFPWSC	0	0	32	74	25	C
1379	RLMLPVYPFLIC	0	0	23	49	25	A
1369	CLMLPVYTFLIC	0	0	12	51	25	A
1373	CLVLPILPYFIC	0	0	4	28	25	A
1367	CLIQPIFPYFVC	0	0	2	18	25	A
1360	CFQYFHILWPHC	0	0	5	46	25	B
1366	CLIIPVSPFLIC	0	0	4	30	25	A
1356	CCIHWDMLWPFC	0	1	10	35	25	B
1357	CFIHWDMIWPFC	0	0	26	50	25	B
1359	CFPYFHILWPFC	0	0	14	51	25	B
1358	CFIHWDRLWPFC	0	0	12	40	25	B
1361	CFTYFHVLWPFC	0	0	18	40	25	B
1362	CLFLLVFPYWLC	0	1	15	75	25	A
1363	CLFLPVFPLLC	0	0	6	53	25	A
1364	CLFLSVFPFFIC	0	0	2	13	25	A
1365	CLIIPVFPYFLC	0	0	4	17	25	A
1406	CLYLPVFPFFDC	0	0	20	76	24	A
1400	CLILPVFPYFSC	0	0	6	30	24	A
1401	CLMFQPFYSSIC	0	0	17	51	24	E
1402	CLMLPVNPFLIC	0	2	18	98	24	A
1403	CLMLPWPYSNVC	0	0	4	30	24	A
1404	CLPWFILRSVLC	0	0	34	118	24	M
1405	CLYLPVFLFFVC	0	0	22	60	24	A
1412	CVFLPVYPFFVC	0	0	7	44	24	A
1407	CLYLPVFPSFLC	0	0	22	56	24	A
1408	CLYLPVFPYFLC	0	0	25	53	24	A
1409	CMTLPVFPFIIC	1	8	85	112	24	A
1410	CPCSFFPIWIIC	0	0	3	48	24	0
1411	CPLPPC	50	42	89	81	24	C
1397	CLIIPAFPFLIC	0	0	3	26	24	A
1413	RLILPIFPYFVC	0	0	1	13	24	A
1399	CLILPVFPYFIY	0	0	3	10	24	A
1398	CLIIPVFPWSC	0	0	7	21	24	A
1396	CLIFTYSKLLYC	0	0	7	45	24	F
1388	CFQYFPYFIC	0	0	0	8	24	0
1380	CCFSFYYCLISC	0	12	119	178	24	C
1382	CFIHWDMLRPLC	0	0	10	53	24	B
1383	CFLLFWPYSFYC	0	6	91	91	24	0
1384	CFPFYACFPLYC	0	0	32	96	24	C
1385	CFQHFHILWPLC	0	1	3	35	24	B
1386	CFQYFDILWPFC	0	0	2	21	24	B
1387	CFQYFHIRWPFC	0	0	12	41	24	B
1381	CFIHWDMLIPFC	0	0	11	29	24	B
1389	CFQYLHILWPLC	0	1	4	40	24	B
1391	CFRLFSLLWPFC	0	1	21	69	24	B
1392	CILLPLFPYFIC	0	0	1	10	24	A
1393	CLFLPVFLFFIC	0	0	2	14	24	A
1394	CLFLPVFPFFFC	0	0	20	58	24	A
1395	CLFLPVYPFIIC	0	0	2	16	24	A
1390	CFRFFSPLWPFC	0	0	25	57	24	B
1437	CPILPTFPYFIC	0	0	2	20	23	A
1431	CLVIPVFPFLIC	0	0	2	11	23	A
1432	CLVLPIFPYFMC	0	0	2	27	23	A
1433	CLVLPILPFFIC	0	0	0	11	23	A
1434	CLVLPLFPFFSC	0	0	28	85	23	A
1435	CLYLPVFPFSLC	0	0	24	76	23	A
1436	CMMLPFLPYNIC	0	0	1	9	23	A
1440	CSQYFHILWPLC	0	0	3	51	23	B
1438	CPWAFTIFRFSC	0	0	22	78	23	L
1439	CPWLFSQSAFWC	0	0	28	51	23	G
1441	GLMLSFLPYNIC	0	0	6	22	23	A
1442	RLFLPVFPFFVC	0	0	19	39	23	A
1443	WLMLSFLPYNIC	0	0	6	13	23	A
1429	CLILPTFPYYIC	0	0	0	19	23	A
1430	CLMLPWLPSHIC	0	1	41	59	23	A
1419	CFTHFHALWPFC	0	0	26	84	23	B
1428	CLILPIFPYYLC	0	0	5	32	23	A
1420	CFTHWDMLWPVC	0	0	5	56	23	B
1427	CLIIPVFPSLIC	0	0	3	29	23	A
1414	CCFYFPFSLFVC	0	4	74	87	23	0
1416	CFQYFHTLWPLC	0	0	4	40	23	B
1417	CFQYFRILWPLC	0	0	0	33	23	B
1418	CFSVYSFVSGLC	0	11	84	107	23	0
1415	CFFLPVYPFFVC	0	0	4	30	23	A
1421	CHLLFFPCLWFC	0	11	131	121	23	0
1425	CLFLPVYPFFPC	0	0	9	76	23	A
1422	CLFIPVYPFLIC	0	0	16	66	23	A
1423	CLFLPVFPYLLC	0	0	26	42	23	A
1424	CLFLPVFQFFVC	0	0	19	38	23	A
1426	CLIIPVFPFSTC	0	0	6	34	23	A
1483	CLVLPIFPFIVC	0	0	17	51	22	A
1482	CLPWFIPRSVVC	0	1	48	103	22	M
1481	CLMLSFLPFFIC	0	0	1	18	22	A
1480	CLMLPWPYPNIC	0	0	2	31	22	A
1478	CLMLPWLSPHIC	0	0	23	55	22	A
1479	CLMLPWLSSHNC	0	0	12	51	22	A
1474	CLLLPLLPFLIC	0	0	28	54	22	A
1477	CLMISWPYSNIC	0	0	7	31	22	A
1476	CLMFRPFYSNIC	0	0	25	70	22	E
1475	CLMFQPSYSNIC	0	0	15	82	22	E
1485	CLVLPVSPFLLC	0	0	38	81	22	A
1484	CLVLPLFSFFIC	0	0	15	22	22	A
1492	CSILAPQYPNVC	0	0	24	87	22	E
1486	CLVLPVYPFLLC	0	0	70	105	22	A
1487	CLWHRARSYYIC	0	0	23	71	22	K
1488	CMFLPFLLMPSC	0	0	19	58	22	D
1489	CPRLFSQFAFWC	0	1	52	71	22	G
1490	CPWAFTTFRFWC	0	0	72	105	22	L
1491	CPWASTIFRFWC	0	0	37	73	22	L
1493	CSPPLPC	10	32	56	108	22	C
1494	CSPWFILRSVVC	0	0	55	94	22	M
1495	CVMLPVYPFLIC	0	0	23	49	22	A
1496	CVSYLACFPWVC	0	0	2	22	22	C
1497	CWDCLFCMLNDC	1	11	96	128	22	0
1498	CYVWWQMLLC	0	0	22	51	22	J
1472	CLLLPLFPWFDC	0	0	18	88	22	A
1473	CLLLPLFPWYVC	0	0	26	49	22	A
1463	CLIIPVFPFFDC	0	0	5	28	22	A
1471	CLIPPTFPYFIC	0	0	1	26	22	A
1456	CLFLPVFPFFSC	0	0	2	31	22	A
1470	CLIPAPQYPNVC	0	0	24	81	22	E
1444	CCFSFYYCLIPC	0	0	52	68	22	C
1445	CFIHWDMLWPFR	0	0	28	45	22	B
1446	CFLAFHYLWPVC	0	1	10	47	22	B
1448	CFSYFSLLWPFC	0	1	28	63	22	B
1449	CFTHFHVLRPFC	0	0	36	94	22	B
1450	CFVSFSVLWPLC	0	1	11	51	22	B
1451	CIMLSWPYSNIC	0	0	11	27	22	A
1452	CLFFPVFPYWLC	0	0	16	44	22	A
1453	CLFLAVYPFFVC	0	0	6	21	22	A
1454	CLFLHVYPFFVC	0	0	11	43	22	A
1455	CLFLPNWHLYAC	0	0	33	61	22	0
1447	CFLCLLPLLYSC	0	11	78	123	22	0
1457	CLFLPVFPFLLC	0	0	8	46	22	A
1465	CLILPFLTSHIC	0	1	33	81	22	A
1458	CLFLPVFPHWIC	0	0	14	24	22	A
1469	CLILPVFPCFIC	0	0	4	27	22	A
1468	CLILPTSPYFIC	0	0	3	25	22	A
1466	CLILPIFPIFIC	0	0	2	14	22	A
1467	CLILPIFPYFVY	0	0	1	14	22	A
1464	CLIIPVFPFNIC	0	0	2	22	22	A
1462	CLIIPVFPC	0	0	3	61	22	A
1461	CLFLPVYPYWLC	0	0	27	72	22	A
1460	CLFLPVYPCFVC	0	0	3	27	22	A
1459	CLFLPVFPWFIC	0	0	2	12	22	A
1521	CLLLPPFPWFIC	0	0	0	22	21	A
1528	CLPWFILRPVVC	0	0	33	82	21	M
1522	CLLLPPGWGNVC	0	12	170	216	21	0
1523	CLMIPVYPFLIC	1	0	9	36	21	A
1524	CLMLPDYPFLIC	0	0	14	56	21	A
1525	CLMLPFLPYNFC	0	0	0	14	21	A
1526	CLMLPFLPYNSC	0	0	0	24	21	A
1527	CLMLTVYPFLIC	0	0	7	29	21	A
1534	CLYLPAFPFFLC	0	0	30	74	21	A
1529	CLPWSILRSVVC	0	2	58	98	21	M
1530	CLVIPLFPFFIC	0	0	25	58	21	A
1531	CLVLPIFSFFVC	0	0	12	46	21	A
1532	CLVLPLFPFFLC	0	0	35	154	21	A
1533	CLVLPVFPFLRC	0	1	27	80	21	A
1535	CRMLSWPYSNIC	0	1	7	24	21	A
1536	CVSFLACFPYLC	0	0	7	32	21	C
1537	CVSFYAWFPLLC	0	0	18	37	21	C
1519	CLLCSLLPYFIC	0	0	11	51	21	A
1520	CLLLPLFPYLIC	0	0	9	40	21	A
1515	CLILPLFPFLAC	0	0	28	95	21	A
1518	CLILPVFPYFNC	0	0	0	25	21	A
1507	CFTHFRVLWPFC	0	0	23	52	21	B
1517	CLILPVFPYFFC	0	0	3	23	21	A
1499	CCFSFYFCPIVC	0	0	9	56	21	C
1500	CFCLWAFHYCAC	0	0	20	56	21	0
1501	CFIHFSFLWPSC	0	0	12	54	21	B
1502	CFIHRDMLWPLC	0	0	5	33	21	B
1504	CFIHWGMLWPIC	0	0	1	23	21	B
1505	CFLCLSMYIC	0	0	5	31	21	0
1506	CFQYFHIPWPLC	0	0	5	35	21	B
1503	CFIHWDMPWPLC	0	0	4	41	21	B
1508	CFVFTFSRLLPC	0	1	17	63	21	F
1512	CLFRPVYPFFVC	0	0	8	44	21	A
1509	CFVWPWWLC	0	8	77	132	21	0
1514	CLILPIFPNLIC	0	0	0	10	21	A
1513	CLIITVFPYFIC	0	0	0	6	21	A
1516	CLILPTFPHFIC	0	0	3	16	21	A
1511	CLFLLVFPFFIC	0	0	1	13	21	A
1510	CIFCHILWPFC	0	0	3	12	21	B
1570	CLVFPLFPFFIC	0	0	13	23	20	A
1561	CLIQPVFPYFIC	0	0	4	15	20	A
1562	CLITPVFPLFIC	0	0	1	15	20	A
1563	CLMFQPFYPNVC	0	0	2	10	20	E
1564	CLMLPFLLYNIC	0	0	1	13	20	A
1565	CLMLSFLPYNIL	0	0	2	9	20	A
1566	CLMLSWPFSNIC	0	0	13	39	20	A
1567	CLMLSWPNSNIC	0	0	16	82	20	A
1568	CLPRFILRSVVC	0	0	41	78	20	M
1569	CLPWFTLRSVVC	0	0	49	110	20	M
1559	CLILPVFPYWIC	0	0	0	12	20	A
1571	CLVLPIFPFLLC	0	0	28	92	20	A
1572	CLVLPTFPFFLC	0	1	82	87	20	A
1573	CLVLPVFPYWLC	0	0	28	62	20	A
1574	CLYLPVFPLLC	0	0	4	31	20	A
1575	CPFHFCFILYAC	0	0	17	37	20	0
1576	CPPSPC	63	71	112	125	20	C
1577	CPWLFSQFAFVC	0	0	12	65	20	G
1578	CSYLPVFPFFIC	0	0	15	38	20	A
1580	CVSFYACFPHLC	0	0	16	33	20	C
1560	CLIPPIFPYFTC	0	0	1	17	20	A
1579	CVGFYACFPLLC	0	1	25	66	20	C
1558	CLILPTFPYLLC	0	0	32	43	20	A
1547	CLFLPVFSFFVC	0	0	21	59	20	A
1557	CLILPLYQLLLC	1	7	200	177	20	A
1538	CCFSFFACFRFC	0	10	96	93	20	C
1539	CCFSFYACFLSC	0	0	37	64	20	C
1540	CFHYFALLWPFC	0	0	29	62	20	B
1542	CFRFFSLLWPYC	0	0	11	69	20	B
1543	CFRFFTLLWPFC	0	0	20	38	20	B
1544	CFSFIACFPLWC	0	2	49	82	20	C
1545	CFVFTFPRLLSC	0	0	6	29	20	F
1546	CICLNLLLPYIC	0	0	10	28	20	H
1541	CFQYFHILWPFF	0	0	5	13	20	B
1548	CLFLPVLPYWIC	0	0	6	38	20	A
1550	CLIILVFPFFVC	0	0	0	11	20	A
1551	CLIINVFPFFIC	0	0	6	8	20	A
1552	CLIIPVFPFFKC	0	0	4	21	20	A
1553	CLIIPVFPFIVC	0	0	1	10	20	A
1554	CLIIPVFPFLSC	0	0	4	22	20	A
1555	CLILAPQYPSVC	0	0	15	45	20	E
1556	CLILPLFPFLGC	0	0	34	59	20	A
1549	CLIHWDMLWPVC	0	0	1	26	20	B
1618	CLSFYACFPLLC	0	0	9	30	19	C
1623	CLVLSVFPFLIC	0	1	52	55	19	A
1622	CLVLSIFPFFVC	0	0	19	74	19	A
1621	CLVLPVLPFLLC	0	0	36	81	19	A
1620	CLVLPLFPFLVC	0	0	26	50	19	A
1619	CLVIPVYPFFIC	0	0	8	22	19	A
1614	CLMLSWPYSNIF	0	0	10	21	19	A
1617	CLRLNLLLPYIC	0	0	7	24	19	H
1616	CLNLPIFPYFVC	0	0	0	7	19	A
1615	CLMLSWPYSNIR	0	0	12	37	19	A
1613	CLMLSFLPYNIW	0	0	1	25	19	A
1625	CLWHRAWSYHIC	0	0	21	44	19	K
1624	CLVPPIFPYFIC	0	0	3	12	19	A
1636	CQYLPFLLIHFC	0	1	16	44	19	D
1626	CLWHRTWSYYIC	0	0	10	51	19	K
1627	CLYFSECVFC	0	0	0	23	19	0
1628	CPLLPLFPFLIC	0	0	21	51	19	A
1629	CPTLPIFPYFIC	0	0	3	13	19	A
1630	CPWLFSQFAFC	0	0	12	44	19	G
1631	CPWLSSQFAFWC	0	0	49	86	19	G
1632	CPWPFSQFAFWC	0	0	43	73	19	G
1633	CQCLPFLLIPFC	0	0	23	77	19	D
1634	CQFLPVFPYWLC	0	0	36	76	19	A
1635	CQYLPFLHIPFC	0	0	6	28	19	D
1610	CLLLPLFPWSIC	0	0	1	21	19	A
1637	CQYMPFLLIPFC	0	1	14	29	19	D
1638	SLMLPVYPFLIC	0	0	15	46	19	A
1612	CLMLPVYPLFIC	0	0	2	17	19	A
1611	CLMLPRLSSHIC	0	0	16	53	19	A
1609	CLLLPIFPFFVC	0	0	16	54	19	A
1595	CLFLPVYPYLIC	0	0	0	5	19	A
1581	CCQYFHILWPFC	0	0	6	29	19	B
1582	CCVWRQMLLC	0	0	16	56	19	J
1583	CFFHPYSFVVIC	0	0	7	29	19	0
1585	CFIHWDTLWPLC	0	0	11	39	19	B
1586	CFILPIFPYLIC	0	0	4	22	19	A
1587	CFLCLPMLFLGC	0	0	16	30	19	I
1588	CFQYFHILWLLC	0	0	4	30	19	B
1589	CFRFFSLLWPIC	0	0	9	62	19	B
1590	CLFLPNWHLYFC	0	0	17	66	19	0
1591	CLFLPVFPFWLC	0	1	45	62	19	A
1592	CLFLPVFPWSC	0	0	6	30	19	A
1593	CLFLPVIPFFVC	0	0	16	47	19	A
1594	CLFLPVYPFFVF	0	0	7	23	19	A
1584	CFHLPYLLIPIC	0	0	5	27	19	D
1596	CLIFTYSKLLTC	0	0	8	52	19	F
1603	CLILPIFPYLLC	0	0	9	30	19	A
1597	CLIIPVFPFSLC	0	0	1	13	19	A
1608	CLIMPVFPYFIC	0	0	1	11	19	A
1606	CLILPVFPFLVC	0	0	15	33	19	A
1605	CLILPVFPFLPC	0	0	18	51	19	A
1604	CLILPIYPYLIC	0	0	1	14	19	A
1607	CLILSIFPYFVC	0	0	0	11	19	A
1602	CLILPIFPYLFC	0	0	2	25	19	A
1601	CLILPIFPYFKC	0	0	4	46	19	A
1600	CLILPIFPLFIC	0	0	0	6	19	A
1599	CLIIPVVPFFVC	0	0	1	14	19	A
1598	CLIIPVFPFTIC	0	0	6	20	19	A
1666	CLLLPLFPYFPC	0	1	24	57	18	A
1677	CPIFTYSKLLSC	0	0	10	63	18	F
1668	CLMLSWPYPNVC	0	0	3	37	18	A
1669	CLMSQPFYSNIC	0	0	23	56	18	E
1670	CLTLAPQYPNVC	0	0	47	89	18	E
1671	CLTLPISPYFIC	0	0	3	20	18	A
1672	CLTPPIFPYFIC	0	0	1	12	18	A
1673	CLVLPIFPYFTC	0	0	4	17	18	A
1674	CLVLPIIPFFVC	0	0	24	48	18	A
1675	CLYFSECVFAC	0	0	1	18	18	0
1676	CLYLPVFPWFVC	0	0	14	45	18	A
1684	CVFLPLWPLFFC	0	10	52	65	18	0
1678	CPWAFTIFRSWC	0	0	35	66	18	L
1679	CPWLFSQFAFIC	0	0	2	21	18	G
1680	CPWLFSQLAFWC	0	1	36	75	18	G
1681	CSMLPWLSSHIC	0	0	23	46	18	A
1682	CSTHFHVLWPFC	0	0	27	65	18	B
1683	CSWHRAWSYYIC	0	0	26	57	18	K
1685	CVIHWDMLWPFC	0	0	17	46	18	B
1686	CVSFYACFLLLC	0	0	14	65	18	C
1687	RLVLPIFPFFVC	0	1	14	30	18	A
1688	YLMLPVYPFLIC	0	0	16	44	18	A
1664	CLIPPISPYFIC	0	0	3	15	18	A
1665	CLLLPLFPWFRC	0	0	6	26	18	A
1667	CLMLSFLPYNKC	0	0	7	57	18	A
1663	CLIMPIFTYFIF	0	0	0	6	18	A
1651	CLFLPVFPYFMC	0	0	3	23	18	A
1662	CLILSVFPYLIC	0	0	21	49	18	A
1640	CCFSYLFCFSC	0	11	53	69	18	0
1641	CFIHGDMLWPFC	0	0	11	41	18	B
1642	CFIPWDMLWPFC	0	0	2	25	18	B
1643	CFQNFFFVC	0	0	7	51	18	0
1644	CFQYFHILC	0	0	4	7	18	B
1645	CFQYFHILRPLC	0	0	3	35	18	B
1647	CFTHWDMLWPSC	0	0	14	38	18	B
1648	CLALPIFPYFIC	0	0	5	17	18	A
1649	CLELPIFPFFVC	0	0	12	59	18	A
1650	CLFLPVFPNWLC	0	0	26	64	18	A
1646	CFQYVHILWPFC	0	0	7	29	18	B
1652	CLFLPVFPYRIC	0	0	2	36	18	A
1654	CLIFQPVYPNVC	0	0	4	21	18	E
1655	CLIIPVFPFYVC	0	0	2	16	18	A
1656	CLIITVFTFFIC	0	0	1	6	18	A
1657	CLILPFLTFLIC	0	0	3	30	18	A
1658	CLILPIFPFFAC	0	0	0	17	18	A
1659	CLILPIFPYLNC	0	0	2	16	18	A
1660	CLILPTFPFFPC	0	0	16	56	18	A
1639	CCFSFYACFVPC	0	1	30	72	18	C
1653	CLFLPVYPYWIC	0	0	0	5	18	A
1661	CLILPVFSYFIC	0	0	3	9	18	A
1724	CLWHRVWSYYIC	0	0	16	27	17	K
1728	CPILPIFPYFTC	0	0	2	15	17	A
1727	CPFLPVFPYWIC	0	0	6	28	17	A
1726	CMSFYACFLSPC	0	1	23	38	17	C
1725	CMIIPIFPWILC	0	0	8	44	17	A
1718	CLMLPVFPYFIC	0	0	1	15	17	A
1723	CLVLPLFPFFNC	0	0	18	39	17	A
1722	CLVLPIFPFFTC	0	1	3	24	17	A
1721	CLTTPVFPFFIC	0	0	5	12	17	A
1720	CLTLPIFPHFIC	0	0	1	16	17	A
1730	CPVLPIFPYFIC	0	0	5	13	17	A
1729	CPILPILPYFIC	0	0	2	12	17	A
1742	RLIIPVFPFFVC	0	0	1	14	17	A
1731	CPWAFTIFHFWC	0	0	27	35	17	L
1732	CPWLFSQFDFWC	0	0	27	37	17	G
1733	CPWLFSRFAFWC	0	0	58	100	17	G
1734	CQLFFYPAFWIC	0	1	15	42	17	0
1735	CQYLPFLFIPFC	0	1	13	37	17	D
1736	CQYLPFLLITFC	0	0	13	58	17	D
1737	CTPPPC	37	34	64	95	17	C
1738	CVNFYACFPLLC	0	0	14	33	17	C
1739	CVSFYACFPLCC	0	0	14	46	17	C
1740	CVSYLACFPRFC	0	0	5	25	17	C
1741	CYVWRRMLIC	0	0	1	26	17	J
1716	CLLLPLSPFLIC	0	0	15	35	17	A
1717	CLMFYSITMLC	0	7	51	67	17	0
1719	CLMLSFLPYNAC	0	0	0	31	17	A
1715	CLLLPLFPWFMC	0	0	4	44	17	A
1701	CLFLPVYPFCVC	0	0	8	30	17	A
1714	CLLLPLFPLLIC	0	0	29	63	17	A
1689	CFIHWDILWPLC	0	0	6	29	17	B
1690	CFIHWDMLWPWC	0	0	4	40	17	B
1691	CFIHWYMLWPFC	0	0	14	37	17	B
1692	CFQYFHILGPFC	0	0	10	37	17	B
1693	CFQYSHILWPLC	0	0	2	24	17	B
1695	CFSFYACFPLDC	0	0	13	54	17	C
1696	CFTHFHVPWPFC	0	1	17	65	17	B
1697	CFVLPLFPFFIC	0	0	14	64	17	A
1698	CLFCHLLPYFIC	0	0	10	24	17	A
1699	CLFLPDYPFFIC	0	0	0	16	17	A
1700	CLFLPVFPYWNC	0	0	6	51	17	A
1694	CFSFCACFPLYC	0	0	14	38	17	C
1702	CLFLPVYPFVVC	0	0	12	35	17	A
1708	CLIIPVFPVFVC	0	0	1	10	17	A
1713	CLILPTFPYSIC	0	0	1	23	17	A
1703	CLIFACSRLASC	0	4	31	50	17	F
1712	CLILPIFTYFIF	0	0	1	14	17	A
1711	CLILPIFPYLSC	0	0	5	17	17	A
1709	CLIISIFPWILC	0	0	17	34	17	A
1710	CLILPIFPWIFC	0	0	2	17	17	A
1707	CLIIPVFPLFC	0	0	0	19	17	A
1706	CLIIPVFLYFIC	0	0	0	6	17	A
1705	CLIIPMFPYFIC	0	0	1	2	17	A
1704	CLIIPIFPWTFC	0	0	2	20	17	A
1790	CLVLPVFPFFLC	0	0	20	39	16	A
1784	CLTLPIFPYFMC	0	0	2	28	16	A
1789	CLVLPISPYFIC	0	0	3	20	16	A
1788	CLVLPIFQFFVC	0	0	8	34	16	A
1787	CLVLPIFPHFIC	0	0	2	9	16	A
1786	CLVFTYSKLLSC	0	0	17	70	16	F
1785	CLTLPIFPYFTC	0	0	8	33	16	A
1779	CLMLPWLSTHIC	0	0	9	35	16	A
1783	CLSFLACFPNIC	0	0	8	39	16	C
1782	CLPWFILRSVEC	0	1	41	61	16	M
1781	CLMLPYLPYNIC	0	0	1	5	16	A
1780	CLMLPWPYYNIC	0	0	1	7	16	A
1778	CLMLPVYPVLIC	0	0	11	30	16	A
1792	CLVLPVYPFLVC	0	0	3	25	16	A
1791	CLVLPVFPSLLC	0	0	41	51	16	A
1806	CWFLPVYPFFVC	0	0	10	35	16	A
1793	CLWRRAWSYYIC	0	0	25	42	16	K
1794	CLYLPVFPFFFC	0	0	23	74	16	A
1795	CLYLPVFPYWIC	0	0	2	12	16	A
1796	CLYLPVLPFFLC	0	1	37	78	16	A
1797	CPTSPC	20	18	23	47	16	C
1798	CPWAFTIFRFIC	0	0	3	25	16	L
1799	CPWLFSQFASWC	0	0	34	87	16	G
1800	CQYLPFLLILFC	0	0	14	44	16	D
1801	CQYLSFLLIPFC	0	0	18	46	16	D
1802	CRFLHPFGLYVC	0	0	10	35	16	0
1803	CSIFLPYFLSLC	0	12	101	82	16	0
1804	CVSYLACFLWSC	0	0	24	56	16	C
1805	CVSYLACSPWFC	0	0	4	16	16	C
1807	CYVWRQVLLC	0	0	24	58	16	J
1776	CLMLPFLPYIIC	0	0	3	10	16	A
1777	CLMLPFPYYNIC	0	0	9	28	16	A
1750	CLFLPDFPFFVC	0	0	5	11	16	A
1775	CLLLPLFPWFFC	0	0	21	47	16	A
1758	CLIIPIFLWILC	0	0	5	25	16	A
1774	CLLLPLFPLYC	0	0	7	31	16	A
1744	CFIRWDMLWPIC	0	0	4	20	16	B
1745	CFPCLPMFFLGC	0	0	28	36	16	I
1746	CFSGFDLLWLFC	0	8	64	63	16	0
1747	CFYCLLPIFYLC	1	5	45	61	16	0
1748	CFYCLRALFFNC	0	4	44	59	16	0
1749	CHILPIFPYFVC	0	0	1	17	16	A
1751	CLFLPVFPYWLY	0	0	35	51	16	A
1752	CLFLPVYPFFEC	0	0	7	25	16	A
1753	CLFLPVYPFFIR	0	0	0	8	16	A
1754	CLFLPVYPFLFC	0	0	2	14	16	A
1755	CLIFTYSELLSC	0	1	13	25	16	F
1756	CLIIPFFPFFIC	0	0	2	8	16	A
1757	CLIIPFFPYFIC	0	0	0	6	16	A
1743	CASYLACFPWFC	0	0	2	22	16	C
1759	CLIIPVFPYNIC	0	0	0	6	16	A
1767	CLILPISPHFIC	0	0	1	15	16	A
1773	CLIPPIFPYFMC	0	0	1	16	16	A
1760	CLIIPVFPYSIC	0	0	1	6	16	A
1772	CLILTIFTYFIC	0	0	0	2	16	A
1771	CLILTIFHYFIC	0	0	1	1	16	A
1769	CLILPVFPYIIC	0	0	1	4	16	A
1768	CLILPLFPWFVC	0	0	14	23	16	A
1770	CLILPVYPFLVC	0	0	1	22	16	A
1766	CLILPIIPYLIC	0	0	0	8	16	A
1765	CLILHIFTYFIC	0	0	3	5	16	A
1764	CLILHIFHYFIC	0	0	5	6	16	A
1763	CLILAPQYPNLC	0	0	14	64	16	E
1762	CLILAPQHPNVC	0	0	20	45	16	E
1761	CLIIPVLPFFMC	0	0	4	16	16	A
1868	CLVLPISPFFIC	0	0	0	18	15	A
1860	CLMLPVFPFLLC	0	0	23	51	15	A
1867	CLVLPIFPYYIC	0	0	1	7	15	A
1866	CLVLPIFPFFVS	0	0	14	42	15	A
1865	CLVHPIFPFFVC	1	0	20	66	15	A
1864	CLPWFILRSAVC	0	1	42	90	15	M
1863	CLPLPLFPWFIC	0	0	3	16	15	A
1862	CLMLSFLPYYLC	0	0	3	8	15	A
1861	CLMLPVYPFRIC	0	0	8	38	15	A
1853	CLILPTYPYFIC	0	0	3	3	15	A
1859	CLMLPIFPYFVC	0	0	1	2	15	A
1857	CLLPPLFPFLIC	0	0	20	48	15	A
1856	CLLLPLFPWYIC	0	0	3	16	15	A
1855	CLLLPLFPWSC	0	0	13	78	15	A
1854	CLILPWLSSHIC	0	0	5	21	15	A
1852	CLILPLFPWFIC	0	0	0	3	15	A
1851	CLILPLFPFLLC	0	0	18	42	15	A
1870	CLVLPVFPFLVC	0	0	6	30	15	A
1869	CLVLPLFPFYIC	0	0	16	46	15	A
1886	CVSYLACFPWHC	0	0	6	39	15	C
1871	CLVLPVFPFPLC	0	0	48	72	15	A
1882	CSYLPVFPFFLC	0	0	28	53	15	A
1890	YLILPVFPYFIC	0	0	1	4	15	A
1889	CYALPFPLMLVC	0	0	6	26	15	0
1888	CWVAFWQLWPFC	1	4	41	64	15	0
1887	CVSYLAYFPWSC	0	0	8	39	15	C
1849	CLILPILPHFIC	0	0	1	10	15	A
1885	CVSCLACFPWSC	0	0	26	45	15	C
1884	CVNYLACFPWSC	0	0	19	34	15	C
1883	CTIYFPWLWTIC	0	0	10	46	15	0
1881	CSILPLFPFLVC	0	0	10	27	15	A
1872	CLYLPVFPFYVC	0	0	9	43	15	A
1880	CRSIYHFAFLIC	1	9	36	61	15	0
1879	CQYLPFLLIPPC	0	0	12	79	15	D
1878	CPWLFTCFSFSC	0	1	21	70	15	G
1877	CPWLFPQFAFWC	0	1	40	67	15	G
1876	CPFHFCFILYEC	0	1	73	82	15	0
1875	CPAPPC	44	34	61	83	15	C
1874	CLYLPVSPFFLC	0	1	23	67	15	A
1873	CLYLPVFPLYC	0	0	5	21	15	A
1850	CLILPISPYSIC	0	0	2	13	15	A
1858	CLMFQPFYSDIC	0	0	6	49	15	E
1848	CLILPILPFFIC	0	0	0	8	15	A
1817	CFQYFHLLWPFC	0	0	12	23	15	B
1825	CLFLPGYPFFIC	0	0	0	13	15	A
1824	CLFLLVFPFFVC	0	0	20	65	15	A
1823	CIRLYLLLPYIC	0	0	7	24	15	H
1822	CIRLNLLLPYFC	0	0	6	46	15	H
1821	CIIMPIFPYFIC	0	0	4	10	15	A
1820	CHIIPVFPFFVC	0	0	1	20	15	A
1819	CHFLPFLLVPIC	0	0	8	49	15	D
1818	CFVSFSVLWPVC	0	0	3	20	15	B
1815	CFQYCHILWPFC	0	0	8	23	15	B
1827	CLFLPVFPFFNC	0	0	2	7	15	A
1814	CFMCLPMFYYLC	0	1	19	34	15	I
1813	CFIHWDVLWPLC	0	0	4	30	15	B
1812	CFIHWDMLWLLC	0	0	2	38	15	B
1811	CFIHWDMLRPVC	0	0	5	15	15	B
1810	CFIHWAMLWPFC	0	0	6	23	15	B
1809	CCWSFYACFLTC	0	0	43	55	15	C
1808	CAFYFPFSLYIC	0	0	4	17	15	0
1847	CLILPIIPYFVC	0	0	1	11	15	A
1826	CLFLPNRHLYSC	0	0	12	36	15	0
1816	CFQYFHILWPTC	0	0	4	31	15	B
1828	CLFLPVFPFFVS	0	0	8	35	15	A
1838	CLILHIFPYFVC	0	0	0	4	15	A
1846	CLILPIFSYFVC	0	0	0	18	15	A
1829	CLFLPVFPYFTC	0	0	5	18	15	A
1845	CLILPIFPYSTC	0	0	5	54	15	A
1844	CLILPIFPYFC	0	0	4	20	15	A
1843	CLILPIFPSFLC	0	0	20	44	15	A
1841	CLILPIFHYFVC	0	0	0	6	15	A
1840	CLILPFLTFHVC	0	1	6	26	15	A
1839	CLILPFLTFHMC	0	0	12	28	15	A
1842	CLILPIFPHYIC	0	0	4	2	15	A
1836	CLIIPVFPFFVY	0	0	0	10	15	A
1835	CLIFTYSKLLLC	0	0	4	27	15	F
1834	CLIFTHSKLLSC	0	0	13	36	15	F
1833	CLFLPVYPVFVC	0	0	9	33	15	A
1832	CLFLPVYPLFAC	0	0	2	18	15	A
1837	CLIIPVSPFFTC	0	0	4	11	15	A
1831	CLFLPVYPFFIF	0	0	0	7	15	A
1830	CLFLPVFPYYIC	0	0	2	18	15	A
1965	CLVLPIFPSFIC	0	0	0	9	14	A
1960	CLMLSFFPFFIC	0	0	0	8	14	A
1957	CLMLPAYPFFIC	0	0	2	8	14	A
1958	CLMLPRPYSNIC	0	0	6	14	14	A
1959	CLMLPVYPFLIR	0	0	15	30	14	A
1963	CLTLPIFPYSIC	0	0	2	11	14	A
1961	CLMLSWPYSTIC	0	0	7	26	14	A
1962	CLSFLLCPVFLC	0	5	69	109	14	0
1964	CLVLPIFPIFVC	0	0	15	35	14	A
1955	CLMFQPFCSNIC	0	0	13	23	14	E
1956	CLMFQPFHSNIC	0	0	13	28	14	E
1946	CLITPVLPFFIC	0	0	1	17	14	A
1954	CLLPPLFPWFIC	0	0	5	30	14	A
1953	CLLLSVFPFFIC	0	0	7	25	14	A
1952	CLLLPTFPFYIC	0	0	12	38	14	A
1951	CLLLPLFPYWLC	0	0	12	42	14	A
1950	CLLLPLFPWFSC	0	0	0	17	14	A
1949	CLLLPLFPFLSC	0	0	10	37	14	A
1948	CLLLPFLPYNIC	0	0	0	11	14	A
1947	CLLIPVFPFFIC	0	0	7	18	14	A
1945	CLIPPIFPYSIC	0	0	2	15	14	A
1944	CLIPPIFPFFLC	0	0	24	48	14	A
1967	CLYLPIFPFFIC	0	0	4	26	14	A
1966	CLVLPIFPWFIC	0	0	0	1	14	A
1988	CYHYSCLFFLSC	0	1	43	72	14	0
1968	CLYLPVFPFYIC	0	0	2	15	14	A
1981	CSLLPLFPWFIC	0	0	1	22	14	A
1942	CLILPLLPFLVC	0	0	21	34	14	A
1992	YLVLPIFPFFVC	0	0	15	30	14	A
1991	FLMLPVYPFLIC	0	0	9	22	14	A
1989	FLFLPVYPFFIC	0	0	0	4	14	A
1987	CWPFPMFLLMFC	0	0	11	54	14	0
1986	CWFLPVYPFFIC	0	0	0	5	14	A
1985	CVSYLTCFPWSC	0	0	19	43	14	C
1984	CVSYLACLPWFC	0	0	4	13	14	C
1983	CVSFYTCFPLLC	0	0	13	51	14	C
1982	CTFGICFFYVC	0	1	9	35	14	0
1980	CSLCLPMFYYLC	0	0	5	16	14	I
1969	CMFLPFLLVPFC	0	0	16	27	14	D
1979	CRMLPVYPFLIC	0	0	15	36	14	A
1978	CQYLPFLLISFC	0	0	17	32	14	D
1977	CQYLPFLLIPFY	0	0	19	29	14	D
1976	CQLLFYPAFWLC	0	0	13	46	14	0
1975	CPYSFVIFYLC	0	6	61	66	14	0
1974	CPWLFSPFMFVC	0	0	4	29	14	G
1973	CPWAFTVFRFWC	0	0	28	49	14	L
1972	CPWAFTISRFWC	0	0	32	43	14	L
1971	CPWAFTIFRFVC	0	0	14	46	14	L
1970	CPHPPC	43	29	46	52	14	C
1943	CLIMPIFPYFIF	0	0	0	10	14	A
1990	FLFLPVYPFFVC	0	0	7	21	14	A
1941	CLILPLFPLLVC	0	0	13	44	14	A
1915	CIILPVFPYFIC	0	0	2	3	14	A
1913	CHPPPC	21	12	31	47	14	C
1912	CFYLPVFPFFVC	0	0	15	23	14	A
1911	CFVLTFSRLLSC	0	1	11	32	14	F
1910	CFVFTLSRLLSC	0	0	12	27	14	F
1909	CFTHWDVLWPFC	0	0	8	8	14	B
1908	CFTHFYVLWPFC	0	0	12	25	14	B
1907	CFTHFSFLWPFC	0	1	14	39	14	B
1906	CFSNYLAFLFSC	0	1	22	42	14	0
1905	CFRFSSLLWPFC	0	0	18	59	14	B
1904	CFRFFTFLWPLC	0	0	14	20	14	B
1903	CFRFFSLSWPFC	0	0	16	25	14	B
1902	CFQYFHSLWPFC	0	0	9	27	14	B
1901	CFQYFHILSPFC	0	0	6	12	14	B
1900	CFMCLPALFLFC	1	2	36	54	14	I
1899	CFIHWDMRWPFC	0	0	19	38	14	B
1898	CFIHWDMLWSIC	0	0	3	12	14	B
1897	CFIHWDMLWRFC	0	0	20	21	14	B
1896	CFIHWDMLGPFC	0	0	22	44	14	B
1895	CFIHRDMLWPVC	0	0	1	20	14	B
1894	CFFLPVYPFFIC	0	0	1	6	14	A
1891	CCFFLFPYVLHC	0	1	32	58	14	0
1892	CCFSLYFCPIFC	0	0	13	32	14	C
1940	CLILPISPYFTC	0	0	5	21	14	A
1914	CIIIPVFPFFVC	1	0	0	3	14	A
1893	CFAFFDALWPLC	0	0	8	41	14	B
1916	CIVLPIFPFFVC	0	0	17	23	14	A
1929	CLIIPIFPWMLC	0	0	10	31	14	A
1917	CLELPLFPFFIC	0	0	11	24	14	A
1939	CLILPILPYYIC	0	0	0	12	14	A
1937	CLILPIFPYHIC	0	0	2	21	14	A
1936	CLILPIFPHFMC	0	0	1	28	14	A
1935	CLILPIFPFFHC	0	0	14	48	14	A
1934	CLILAPQCPNVC	0	2	15	36	14	E
1933	CLIIPVSPSFIC	0	0	0	10	14	A
1932	CLIIPVSPFFMC	0	0	3	12	14	A
1931	CLIIPVFPFFIG	0	0	6	13	14	A
1930	CLIIPMFPFLIC	0	0	0	6	14	A
1938	CLILPIHPYFIC	0	0	0	7	14	A
1928	CLIIPFC	0	0	9	30	14	A
1922	CLFLPVFPYFLC	0	0	7	25	14	A
1927	CLIFPVFPFFVC	0	0	1	10	14	A
1919	CLFLHVYPFFIC	0	0	0	3	14	A
1920	CLFLPGFPFFVC	0	0	9	42	14	A
1921	CLFLPVDPFFVC	0	0	2	15	14	A
1918	CLFIPVYPFFTC	0	0	25	45	14	A
1923	CLFLPVLPYFIC	0	0	4	17	14	A
1924	CLFLPVYPFLAC	0	0	2	31	14	A
1925	CLFRPVYPFFIC	0	0	0	9	14	A
1926	CLFTPVYPFFIC	0	0	13	32	14	A
2064	CLVLPLFPLFVC	0	0	4	16	13	A
2055	CLMLWPFC	0	0	14	30	13	B
2062	CLVLPIYPFFIC	0	0	1	10	13	A
2061	CLVLPIFPFFDC	0	0	5	40	13	A
2060	CLVHPLFPFFIC	0	0	8	22	13	A
2059	CLVFVFSRLLNC	0	5	40	62	13	F
[truncated: 1,160 more rows]
