# Supplementary material for: An integrated platform approach enables discovery of potent, selective and ligand-competitive cyclic peptides targeting the GIP receptor
Source: Royal Society of Chemistry journal article supplement (doi:10.1039/d1sc06844j), 2022-01-01
Supplement: d1sc06844j2.xlsx [file d1sc06844j2.xlsx]

## Sheet: Sheet1
cleaned_sequence	round 1	round 2	round 3	round 4	round 5	syntesized sequence - Z = Ac	kd to GIP-R (BLI) in M	determination method (e.g. single conc. crude or d/r purified peptide)	peptide type (selection or mutatgenesis scan)
MCLILPIFPYFIC	27	416	172519	832296	1599980	ZMCLILPIFPYFICGSGSDYKDDDDK	3.9e-08	Crude	Selection
MCLIIPVFPFFIC	12	355	118959	469564	795824	ZMCLIIPVFPFFICGSGSDYKDDDDK	6.5e-08	Crude	Selection
MCLMLSFLPYNIC	6	261	89665	367138	469289	ZMCLMLSFLPYNICGSGSDYKDDDDK	1	Crude	Selection
MCFQYFHILWPFC	10	276	58268	207335	201384	MCFQYFHILWPFCGSGSDYKDDDDK	6.50737e-08	Purified	Selection
MCFQYFHILWPFC	10	276	58268	207335	201384	ZMCFQYFHILWPFCGSGSDYKDDDDK	1.41047e-08	Crude	Mutagenesis scan
MCFQYFHILWPFC	10	276	58268	207335	201384	ZMCFQYFHILWPFCGSGSDYKDDDDK	4.14411e-08	Purified	Selection
MCFQYFHILWPFC	10	276	58268	207335	201384	ZMCFQYFHILWPFCGSGSDYKDDDDK	5.4e-08	Crude	Selection
MCLFLPVYPFFVC	7	179	60237	190510	141586	ZMCLFLPVYPFFVCGSGSDYKDDDDK	1.15e-07	Crude	Selection
MCIFCHSFCSVFRC	6	154	31880	112594	110857
MCFIHWDMLWPFC	11	468	88036	192540	100429	MCFIHWDMLWPFCGSGSDYKDDDDK	3.55701e-08	Purified	Selection
MCFIHWDMLWPFC	11	468	88036	192540	100429	ZMCFIHWDMLWPFCGSGSDYKDDDDK	1.66332e-08	Purified	Selection
MCFIHWDMLWPFC	11	468	88036	192540	100429	ZMCFIHWDMLWPFCGSGSDYKDDDDK	7.6e-08	Crude	Selection
MCLFLPVYPFFIC	0	4	2275	32459	90815	ZMCLFLPVYPFFICGSGSDYKDDDDK	6.5e-08	Crude	Selection
MCLMLSWPYSNIC	5	234	46445	140147	88460	ZMCLMLSWPYSNICGSGSDYKDDDDK	1.45e-07	Crude	Selection
MCLMLPVYPFLIC	6	229	48002	123196	69707	ZMCLMLPVYPFLICGSGSDYKDDDDK	9.2e-08	Crude	Selection
MCLFLPVFPFFVC	0	156	29256	73813	41549	ZMCLFLPVFPFFVCGSGSDYKDDDDK	3.47e-07	Crude	Selection
MCLILPIFPYFVC	0	3	1771	17763	35309
MCLVLPIFPFFVC	3	174	36246	73012	34764
MCLMLPFLPYNIC	0	3	1828	14996	32654	ZMCLMLPFLPYNICGSGSDYKDDDDK	7.2e-08	Crude	Selection
MCLILPVFPYFIC	0	6	2772	15396	31521
MCLIIPVFPFFVC	0	4	2117	19416	29503
MCLFLPVFPFFIC	0	0	1190	12887	24798
MCLIIPIFPWILC	2	134	22753	42569	22949	ZMCLIIPIFPWILCGSGSDYKDDDDK	1	Crude	Selection
MCLFLPVFPYWLC	7	192	41018	67256	20996	ZMCLFLPVFPYWLCGSGSDYKDDDDK	2.51e-07	Crude	Selection
MCLIIPVFPYFIC	0	0	275	4068	16639
MCIRLNLLLPYIC	3	80	8972	27027	16492	ZMCIRLNLLLPYICGSGSDYKDDDDK	1	Crude	Selection
MCIRLNLLLPYIC	3	80	8972	27027	16492	ZMCIRLNLLLPYICGSGSDYKDDDDK	1	Crude	Selection
MCQYLPFLLIPFC	0	176	18743	40377	15661	ZMCQYLPFLLIPFCGSGSDYKDDDDK	3.17e-07	Crude	Selection
MCLVLPLFPFFIC	3	108	17500	29688	14227
MCVSFYACFPLLC	3	122	15158	34324	13727
MCVSYLACFPWSC	0	135	15423	34727	12197
MCLILPIFPYLIC	0	0	1544	8121	12145
MCALFPFPYSFTIC	6	113	22627	36797	11343
MCLIIPVFPFLIC	0	2	1335	7185	10438
MCLYLPVFPFFIC	0	21	4460	11689	10362
MCLYLPVFPFFVC	2	117	16695	28343	9479
MCFSFYACFPLYC	0	101	11426	22115	8979
MCLILPTFPYFIC	0	2	940	5392	8234	ZMCLILPTFPYFICGSGSDYKDDDDK	3.2e-08	Crude	Selection
MCLLLPLFPWFVC	3	144	18454	27071	7941
MCFIHWDMLWPIC	2	0	1331	9801	7938
MCLFLPVFPYWIC	0	2	1497	6091	7685
MCLVLPIFPYFIC	0	2	600	3732	6908
MCLWHRAWSYYIC	2	92	9461	18326	6792	ZMCLWHRAWSYYICGSGSDYKDDDDK	3.67e-07	Crude	Selection
MCYVWRQMLLC	2	114	14138	26313	6374	ZMCYVWRQMLLCGSGSDYKDDDDK	1	Crude	Selection
MCMNFLTCVWMARLC	0	77	7325	14995	6360
MCLVLPIFPFFIC	0	0	267	2958	6138
MCCNCLPLSLLLIC	3	98	13468	20904	5800
MCFTHFHVLWPFC	2	88	8674	17386	5499	ZMCFTHFHVLWPFCGSGSDYKDDDDK	1.88476e-07	Crude	Mutagenesis scan
MCFTHFHVLWPFC	2	88	8674	17386	5499	ZMCFTHFHVLWPFCGSGSDYKDDDDK	2.4e-07	Crude	Selection
MCLMFQPFYSNIC	0	69	6300	12358	5170	ZMCLMFQPFYSNICGSGSDYKDDDDK	1.57e-07	Crude	Selection
MCLILPILPYFIC	0	0	736	3916	5037
MCLTLPIFPYFIC	0	0	688	3441	4720
MCLFLPVYPYFIC	0	0	179	1632	4629
MCLILPIFPYYIC	0	0	274	2327	4622
MCLVLLGYQPIPLPC	0	102	19598	24210	4469
MCPWLFSQFAFWC	3	115	10857	15001	4460	ZMCPWLFSQFAFWCGSGSDYKDDDDK	1	Crude	Selection
MCLPWFILRSVVC	0	161	15714	21432	4441	ZMCLPWFILRSVVCGSGSDYKDDDDK	3.7e-08	Crude	Selection
MCLIFTYSKLLSC	4	69	6332	13525	4393	ZMCLIFTYSKLLSCGSGSDYKDDDDK	5.779e-05	Crude	Selection
MCLILAPQYPNVC	0	136	10112	17202	4389
MCLILPIFPYFMC	0	0	829	5540	4246
MCLILPIFPFFIC	0	0	279	2086	4152
MCLILPIFPYFTC	0	0	751	4901	4148
MCPWAFTIFRFWC	0	111	10204	13003	4132	ZMCPWAFTIFRFWCGSGSDYKDDDDK	1	Crude	Selection
MCFQYFHILWPLC	0	4	1095	6084	4103	ZMCFQYFHILWPLCGSGSDYKDDDDK	1	Crude	Mutagenesis scan
MCLILPISPYFIC	0	0	673	3382	4074
MCLILPIFPHFIC	0	3	542	3026	4065
MCLIPPIFPYFIC	0	0	570	2952	4029
MCLLLPLFPWFIC	0	0	649	3879	3828
MCLYLPVFPFFLC	3	81	6658	11938	3805
MCPILPIFPYFIC	0	0	531	2723	3683
MCLILPIFPYSIC	0	2	569	2926	3667	ZMCLILPIFPYSICGSGSDYKDDDDK	2.765e-06	Crude	Selection
MCFIHWDMLWPLC	2	4	1997	7966	3640
MCLMLPVYPFFIC	0	0	197	1934	3602	ZMCLMLPVYPFFICGSGSDYKDDDDK	7.3e-08	Crude	Selection
MCLIIPVLPFFIC	0	0	518	2782	3382
MCLFLPVFPYFIC	0	0	924	2750	3377
MCLMLPWLSSHIC	0	59	5135	9834	3255	ZMCLMLPWLSSHICGSGSDYKDDDDK	1.179e-06	Crude	Selection
MCVSYLACFPWFC	0	6	1012	4437	3019
MCLIIPVFPLFIC	0	3	518	2504	2849
MCLILPIYPYFIC	0	0	147	1079	2838
MCLMLSFLPYFIC	0	0	71	1284	2829
MCFRFFSLLWPFC	0	57	5170	7747	2816	MCFRFFSLLWPFCGSGSDYKDDDDK	2.24558e-05	Purified	Selection
MCFRFFSLLWPFC	0	57	5170	7747	2816	ZMCFRFFSLLWPFCGSGSDYKDDDDK	3.20881e-08	Purified	Selection
MCFRFFSLLWPFC	0	57	5170	7747	2816	ZMCFRFFSLLWPFCGSGSDYKDDDDK	1	Crude	Selection
MCIALLGGQTLVWNC	0	9	5065	9378	2750
MCLIIPVFPFFMC	0	3	623	3648	2742
MCLIIPVSPFFIC	0	0	462	2112	2469
MCLIIPVFPFFTC	0	0	518	3111	2442
MCFILPIFPYFIC	0	2	331	1890	2414
MCLMLSFLPYNVC	0	2	293	2372	2345
MCLIIPAFPFFIC	0	2	362	1941	2337
MCLITPVFPFFIC	0	4	413	2047	2298
MCLMLPWPYSNIC	0	0	737	2964	2242	ZMCLMLPWPYSNICGSGSDYKDDDDK	7.3e-08	Crude	Selection
MCLLLPLFPFLIC	0	80	4756	7644	2240
MCLIIPVYPFFIC	0	0	319	1112	2203
MCLVLPVFPFLLC	2	79	10220	11107	2115	ZMCLVLPVFPFLLCGSGSDYKDDDDK	3.29e-07	Crude	Selection
MCPIIPVFPFFIC	0	0	344	1631	2094
MCLIIPVFPSFIC	0	0	393	1809	2045
MCLIIPVFPFSIC	0	0	384	1771	2030
MCLTIPVFPFFIC	0	0	395	1691	1994	ZMCLTIPVFPFFICGSGSDYKDDDDK	1.17e-07	Crude	Selection
MCLFIPVYPFFIC	2	22	3109	5420	1975
MCLILPIFPYFLC	0	0	259	1813	1928
MCLFLPIFPYFIC	0	0	182	979	1926
MCLILPIFPYNIC	0	0	42	1425	1838
MCLILPIFPFFLC	0	48	4847	6516	1813
MCFVFTFSRLLSC	0	55	2733	5111	1764
MCFIHWDMLWPVC	0	0	451	2757	1714
MCLMLPVYPFLVC	0	0	498	2635	1707
MCLVIPVFPFFIC	0	0	234	1124	1706
MCLIIPVFPFFLC	0	0	221	1708	1694
MCLMLSFLPYNTC	0	0	422	2272	1605
MCFTHWDMLWPFC	0	3	1271	3177	1547	ZMCFTHWDMLWPFCGSGSDYKDDDDK	2.72e-07	Crude	Selection
MCLIIPIFPYFIC	0	0	43	527	1533
MCFQYFHILWPSC	0	0	417	2436	1478	ZMCFQYFHILWPSCGSGSDYKDDDDK	1	Crude	Mutagenesis scan
MCFQYFHILWPSC	0	0	417	2436	1478	ZMCFQYFHILWPSCGSGSDYKDDDDK	1	Crude	Selection
MCLILPIFPFFVC	0	0	232	1218	1471
MCLILPIFPCFIC	0	0	209	1164	1434
MCLIIPVFPFYIC	0	0	136	1017	1433
MCLILPLFPFLVC	0	67	3683	5476	1422
MCLMSSFLPYNIC	0	0	307	1379	1400
MCVSFYACFPLFC	0	4	559	2402	1369
MCLFLPNWHLYSC	0	54	3298	4718	1366
MCFLCLPMFFLGC	0	55	2851	4526	1365
MCVSYLACFPWYC	0	4	768	2351	1328
MCLMLSSLPYNIC	0	0	299	1315	1326
MCLILPIFPYFSC	0	0	404	1792	1325
MCLMLSFLPHNIC	0	3	290	1345	1321
MCQYLPFLLIPIC	0	0	223	1869	1318
MCLMLSLLPYNIC	0	0	338	1566	1295
MCLFLPVYPFFAC	0	3	618	2886	1293	ZMCLFLPVYPFFACGSGSDYKDDDDK	4.37e-07	Crude	Selection
MCLIVPVFPFFIC	0	0	235	1040	1280
MCLMLSFSPYNIC	0	0	290	1309	1280
MCLMLSFLPYNMC	0	0	407	2483	1271
MCSYMLFWTC	0	46	2892	4670	1249
MCLMLSWPYPNIC	0	0	555	1967	1247
MCPWLFTCFSFFC	0	101	4388	5970	1229
MCSMLSFLPYNIC	0	0	235	1219	1227
MCYVWRQMLIC	0	3	249	1978	1222
MCFIHFSFLWPFC	0	48	2065	3641	1218	ZMCFIHFSFLWPFCGSGSDYKDDDDK	1	Crude	Selection
MCFLCLPMFYYLC	0	45	2302	3879	1213
MCLLLPVYPFFVC	0	0	673	1862	1208
MCLFLPVYPFFLC	0	0	257	1732	1165
MCFRYFHILWPFC	0	2	320	1219	1139	ZMCFRYFHILWPFCGSGSDYKDDDDK	8.27847e-08	Crude	Mutagenesis scan
MCLIMPIFPYFIC	0	0	286	843	1121
MCLVLPLFPYFIC	0	0	98	712	1112
MCLILPTFPYFLC	0	29	3442	4291	1110
MCLIIPIFPWIFC	0	2	431	2139	1109
MCCFSFYFCPIFC	0	35	2691	3843	1101	ZMCCFSFYFCPIFCGSGSDYKDDDDK	1	Crude	Selection
MCFIIPVFPFFIC	0	0	185	900	1084
MCMFLPFLLMPFC	0	39	1878	3340	1072
MCLIQPIFPYFIC	0	0	116	768	1064	ZMCLIQPIFPYFICGSGSDYKDDDDK	1	Crude	Selection
MCLILSIFPYFIC	0	0	113	663	1060
MCLVLPLFPFFVC	0	21	1706	3168	1036
MCFQYFHILWPIC	0	0	140	1130	1006	ZMCFQYFHILWPICGSGSDYKDDDDK	1	Crude	Mutagenesis scan
MCLILPIFPYFNC	0	0	205	1240	992
MCRFLPFLLQPFC	0	35	2208	3712	980
MCIRLNLLLPYMC	0	6	516	1764	955
MCLIIPVFPFFSC	0	0	262	1306	955
MCLQYFHILWPFC	0	0	325	1311	946	ZMCLQYFHILWPFCGSGSDYKDDDDK	7.48925e-08	Crude	Mutagenesis scan
MCLVLSFLPYNIC	0	0	240	906	936
MCIFCHSFCSVFPC	0	2	438	1558	921
MCFQYFHILWPYC	0	0	201	1309	905	ZMCFQYFHILWPYCGSGSDYKDDDDK	2.66909e-07	Crude	Mutagenesis scan
MCIFCHSFCSVFHC	0	0	263	1152	889
MCLIIPVFLFFIC	0	0	150	758	888
MCLILLIFPYFIC	0	0	84	607	888
MCFQYLHILWPFC	0	2	290	1164	884	ZMCFQYLHILWPFCGSGSDYKDDDDK	1	Crude	Mutagenesis scan
MCFIHWDILWPFC	0	4	336	1160	883
MCIFCHSFCSVFIC	0	0	22	431	876
MCLTLSFLPYNIC	0	0	227	873	870
MCHILPIFPYFIC	0	0	107	623	859
MCLIHWDMLWPFC	0	0	485	1588	855
MCFQYFRILWPFC	0	0	218	928	854	ZMCFQYFRILWPFCGSGSDYKDDDDK	1.32601e-08	Crude	Mutagenesis scan
MCFQYFRILWPFC	0	0	218	928	854	ZMCFQYFRILWPFCGSGSDYKDDDDK	1.73e-07	Crude	Selection
MCLMLSFLPYSIC	0	3	198	951	850
MRLILPIFPYFIC	0	0	102	472	849
MCRFLHPFGLYFC	0	31	2493	3403	844	ZMCRFLHPFGLYFCGSGSDYKDDDDK	1.422e-06	Crude	Selection
MCLILSFLPYNIC	0	2	134	683	836
MCLFLPVYPYFVC	0	0	104	462	824
MCLMLSWPYSNVC	0	0	229	1320	824
MCLILPFLTFHIC	2	35	1527	2640	810	ZMCLILPFLTFHICGSGSDYKDDDDK	8e-07	Crude	Selection
MCLILPIFPYIIC	0	0	87	509	805
MCCFSFYACFFSC	0	30	2312	2921	799	ZMCCFSFYACFFSCGSGSDYKDDDDK	1	Crude	Selection
MCCNCLPLSLLFIC	0	0	122	814	790
MCLILPVFPYFVC	0	0	37	338	789
MCLILPVYPFFVC	0	0	120	616	781
MCFIHWDMLWPSC	0	0	680	2216	773	ZMCFIHWDMLWPSCGSGSDYKDDDDK	1	Crude	Selection
MCLILPVFPFLLC	0	8	1435	2416	772
MCIFCHSFCSVFLC	0	0	132	724	770
MCLILPVFPFFIC	0	0	29	273	752
MCFLAFHYLWPFC	0	31	1424	2224	748	ZMCFLAFHYLWPFCGSGSDYKDDDDK	1	Crude	Selection
MCMNFLTCVWMARIC	0	0	103	921	746
MCLILPIFPYFFC	0	0	143	1015	745
MCFQYFHTLWPFC	0	0	256	1049	744	ZMCFQYFHTLWPFCGSGSDYKDDDDK	1.00052e-07	Crude	Mutagenesis scan
MCFQYFHTLWPFC	0	0	256	1049	744	ZMCFQYFHTLWPFCGSGSDYKDDDDK	1.55e-07	Crude	Selection
MCLIFQPVYPNIC	0	5	881	2054	734
MCILCHSFCSVFRC	0	2	230	887	733
MCLLAFGPWTTLFAC	0	33	1476	2446	732
MCLLLPVYPFFIC	0	0	36	304	727
MCSQYFHILWPFC	0	2	254	1035	716	ZMCSQYFHILWPFCGSGSDYKDDDDK	3.07945e-07	Crude	Mutagenesis scan
MCSQYFHILWPFC	0	2	254	1035	716	ZMCSQYFHILWPFCGSGSDYKDDDDK	2.097e-05	Crude	Selection
MCLVLPVYPFLIC	0	0	409	1201	716
MCFQYFHIPWPFC	0	0	204	911	713	ZMCFQYFHIPWPFCGSGSDYKDDDDK	1	Crude	Mutagenesis scan
MCQYLPFLLIPLC	0	2	426	1716	707
MCLILPIFSYFIC	0	0	94	515	698
MCLMLSFFPYFIC	0	0	20	406	684
MCLFLPVYPFLIC	0	0	86	550	683
MCLMFQPFYPNIC	0	2	250	935	683
MCLILPIFLYFIC	0	0	109	442	675
MSLILPIFPYFIC	0	0	63	390	668
MCFQYFHILRPFC	0	0	231	935	664	ZMCFQYFHILRPFCGSGSDYKDDDDK	1	Crude	Mutagenesis scan
MCVSFLACIPYLC	0	34	2036	2962	658
MCLIIPMFPFFIC	0	0	112	522	654
MCLMLSFLPYYIC	0	0	62	468	642
MCFQHFHILWPFC	0	0	258	936	641	ZMCFQHFHILWPFCGSGSDYKDDDDK	5.22891e-08	Crude	Mutagenesis scan
MCLFLPVFPYWPC	0	2	503	1839	640
MCLMLSFMPYNIC	0	0	59	499	633
MCFLCLPMFFLSC	0	28	2011	2628	630
MCLFLPVYPFLVC	0	0	286	1050	617
MCVSYLACFPWLC	0	0	107	669	610
MCLIITVFPFFIC	0	0	89	386	609
MCFQYSHILWPFC	0	0	213	854	608	ZMCFQYSHILWPFCGSGSDYKDDDDK	1	Crude	Mutagenesis scan
MCLIIPVFPFFNC	0	0	136	853	606
MCLILPIIPYFIC	0	0	94	513	600
MCLILPVYPFFIC	0	0	7	130	590
MCLMLSFLPYDIC	0	0	121	612	589
MCLILPIFTYFIC	0	0	61	280	585
MCLNLPIFPYFIC	0	0	64	366	572
MCIFCHRFCSVFRC	0	0	95	517	570
MCWFVHSFSLYVC	0	26	2018	2186	569
MCLWHRAWSYFIC	0	0	69	626	567
MCLVLPIFPFLVC	0	3	435	1099	565
MCWPFPMFLLMSC	0	89	2264	2735	563
MYLILPIFPYFIC	0	0	48	300	551
MCLMLSFLPCNIC	0	0	132	556	547
MCLFLPVYPLFVC	0	0	247	875	545
MCLILPIFHYFIC	0	0	66	297	538
MCFQYFHILWPCC	0	0	169	825	536
MCLMLSFLPYNNC	0	0	136	787	533
MCLILPTFPFFLC	0	32	1599	2200	529
MCLSFYACFPLLRC	0	47	2379	2745	527
MCLFLPVFPFFAC	0	0	276	1114	514
MCLILPVYPFLIC	0	0	169	559	509
MCLFLPVYPFFGC	0	0	191	977	506
MCIRLNLLLPFIC	0	0	51	443	504
MCCFFLFPYVLYC	0	34	1435	1911	503
MCFIHWDMLWPYC	0	0	277	1147	503
MCFQYFHILWPVC	0	0	89	596	500	ZMCFQYFHILWPVCGSGSDYKDDDDK	1	Crude	Mutagenesis scan
MCIILPIFPYFIC	0	0	67	301	500
MCQYLPFLLIPYC	0	0	399	1136	493
MCIFLPIWSFLAC	0	37	1352	2028	491
MCLILPILPYNIC	0	0	12	232	490
MCLILPIFPNFIC	0	0	72	371	487
MCFIHWDTLWPFC	0	4	417	1043	485
MCLFPPVYPFFVC	0	0	226	778	485
MCLMLPVYPFLMC	0	0	439	1600	483
MCLIIPVFPVFIC	0	0	71	356	481
MCLIISVFPFFIC	0	0	66	347	480
MCLIIPVFPFIIC	0	0	77	310	477
MCLMLSFLSYNIC	0	0	92	398	475
MCFIHWDMPWPFC	0	0	317	961	474
MCIFCHSFCSVLRC	0	0	176	672	471
MCLFLPVFPFFLC	0	0	156	771	470
MCLIIPVFPFFFC	0	0	92	616	463
MCVILPIFPYFIC	0	0	61	360	462
MCFQNYLMYLIVC	0	26	846	1675	461	ZMCFQNYLMYLIVCGSGSDYKDDDDK	1	Crude	Selection
MCLFLPAYPFFVC	0	0	216	832	460
MCLIIPVVPFFIC	0	0	65	357	460
MCFIHWDMLRPFC	0	0	356	1013	453
MCSFLPVYPFFVC	0	0	170	769	450
MCLMLSFLPYNSC	0	0	126	706	448
MCLMPSWPYSNIC	0	0	203	762	439
MCLVLPVFPFFVC	0	0	259	723	435
MCLSLPVYPFFVC	0	2	227	875	432
MRLIIPVFPFFIC	0	0	63	292	432
MCLLLPVFPFFVC	0	0	431	952	429
MCLFLPVFPYWFC	0	0	174	930	428
MCFQYFHVLWPFC	0	0	151	641	425	ZMCFQYFHVLWPFCGSGSDYKDDDDK	7.59355e-08	Crude	Mutagenesis scan
MCLFLPVYPFSVC	0	0	215	777	422
MCLMLSWPYYNIC	0	2	84	365	422
MCHIIPVFPFFIC	0	0	73	350	421
MCYALPFPLMLLC	0	44	1987	2294	412
MCLMLTFLPYNIC	0	0	83	372	410
MCTFCHSFCSVFRC	0	0	146	549	409
MCLVLPIFPFFAC	0	3	279	1146	404
MCLILPVFPFFVC	0	0	67	321	403
MCCFSFYFCLFPC	0	19	854	1380	401	ZMCCFSFYFCLFPCGSGSDYKDDDDK	1	Crude	Selection
MCLIIPIFPWIVC	0	0	114	551	395
MCPWIFSDYSFFC	0	38	1181	1689	390	ZMCPWIFSDYSFFCGSGSDYKDDDDK	1	Crude	Selection
MCLMLSWPYSNTC	0	0	218	1044	389	ZMCLMLSWPYSNTCGSGSDYKDDDDK	1	Crude	Selection
MCLILPIFPWILC	0	0	68	363	389
MCLIIPVYPFLIC	0	0	39	315	387
MCLILPNFPYFIC	0	0	55	238	387
MCFIYWDMLWPFC	0	0	130	459	386
MCLVLEYSMLVSC	0	33	1282	1690	382	ZMCLVLEYSMLVSCGSGSDYKDDDDK	1	Crude	Selection
MCFIHWDMLWPCC	0	0	245	1002	377
MCLIILVFPFFIC	0	0	50	290	376
MCLMLSWPYSNMC	0	0	232	1073	376
MCLILHIFPYFIC	0	0	40	221	374
MCLILTIFPYFIC	0	0	48	196	374
MCFIHRDMLWPFC	0	0	279	789	371
MCLIIPVFSFFIC	0	0	61	293	369
MCLYLPVFPYFIC	0	0	45	272	369
MCLILPWLSKNIC	0	33	1118	1733	368
MCLILPIFPYSNIC	0	0	4	337	367
MCIFCHSFRSVFRC	0	0	92	445	366
MCLFLPVYPSFVC	0	0	193	704	363
MCLMLPIYPFLIC	0	12	526	1042	363
MCLMLPVYPLLIC	0	0	219	733	362
MCFQCFHILWPFC	0	0	113	483	359
MCLMLPIFPYFIC	0	0	30	186	358
MCQYLPFLLIPVC	0	0	96	648	353	ZMCQYLPFLLIPVCGSGSDYKDDDDK	5.79e-07	Crude	Selection
MCFSFYACFPLFC	0	0	146	504	352
MCLILPIFPYFICGC	0	0	29	333	350
MCSIHWDMLWPFC	0	3	290	771	349
MCLMLSRPYSNIC	0	2	200	655	347
MCLNIPVFPFFIC	0	0	55	278	347
MCCWSFYACFLSC	0	46	1307	1579	344
MCFVHWDMLWPFC	0	0	218	644	344
MCIFCHSLCSVFRC	0	0	145	547	343
MCYMTLNMLIQNHC	0	12	1029	1670	339
MCIFCHSFCSVSRC	0	2	142	453	336
MCLMPPVYPFLIC	0	0	193	647	334
MCPFHFCFILYGC	0	34	1302	1455	332
MCVFCHSFCSVFRC	0	0	150	654	330
MCLFLPVFPFLIC	0	0	36	248	328
MCPWLFTCFSFIC	0	0	90	574	327
MCLLLPLFPYFLC	0	22	1558	1913	326
MCLMLPVYPFPIC	0	0	161	625	323
MCLIIPVIPFFIC	0	0	63	294	321
MCLIIHVFPFFIC	0	0	40	195	319
MCIFRHSFCSVFRC	0	0	102	504	317
MCCFSFYACFVLC	0	25	816	1173	315
MCFIHWNMLWPFC	0	0	137	505	313
MCLFFHPFSLYVC	0	19	1051	1462	309	ZMCLFFHPFSLYVCGSGSDYKDDDDK	3.286e-05	Crude	Selection
MCLIFPVFPFFIC	0	0	54	248	309
MCLIIPEFPFFIC	0	0	47	270	309
MCLLLPVFPFFIC	0	0	25	158	306
MCFSNYLAFLFCC	0	30	818	1160	304
MCLIIPIFPWIIC	0	0	21	169	304
MCLMLTMFNYHVNVC	0	16	1033	1445	304
MCLIIPVFQFFIC	0	0	48	152	302
MCLILPVFPYLIC	0	0	39	242	301
MCISCHSFCSVFRC	0	0	94	387	298
MCLVLPIFPFFLC	0	0	197	708	298
MCLVLPIFPFFMC	0	0	141	584	297
MCIFCHSSCSVFRC	0	0	100	392	296
MCFAFFDALWPFC	0	24	606	1023	295
MCFIHWDVLWPFC	0	0	287	636	295
MCLMLPVYPFFVC	0	0	58	364	295
MCLFPPVYPFFIC	0	0	7	141	294
MCLFLPVHPFFVC	0	0	128	526	293
MCLMLSFLLYNIC	0	0	51	275	288	ZMCLMLSFLLYNICGSGSDYKDDDDK	1	Crude	Selection
MCIFCHSFCSAFRC	0	0	100	419	286
MCLMMSFLPYNIC	0	0	60	261	280
MCMNFLTCAWMARLC	0	2	131	454	279
MCLIIPVFRC	0	0	9	151	278
MCMFFHPFSLYVC	0	14	877	1159	278
MCRILPIFPYFIC	0	0	34	168	278
MCLINPVFPFFIC	0	0	33	200	276
MCLMLSFLPYNFC	0	0	50	412	276
MCIRLNLLLPNIC	0	0	22	254	275
MCLFLPVYPFFMC	0	0	6	233	275
MCVSYLACFPWPC	0	2	204	666	275
MCLIIPVFPIFIC	0	0	66	211	273
MCLSLPVYPFFIC	0	0	11	144	273
MCLILAPQYPNIC	0	0	52	351	272
MCLILPLFPFFLC	2	34	929	1253	272
MCLTLSWPYSNIC	0	0	127	469	272
MCALFPFPYSFTMC	0	2	455	1051	271
MCLFLPVYPLFIC	0	0	7	128	271
MCLMLPVYPSLIC	0	0	169	529	271
MCVSFYACFPLIC	0	0	25	263	271
MCIRLNLLLPYVC	0	0	61	384	270
MCLFIPVFPFFIC	0	0	49	160	269
MCMMLSFLPYNIC	0	0	67	316	269
MCLFLPAYPFFIC	0	0	4	143	268
MCVSFYACFPLSC	0	19	700	1022	268
MCVSFYACFPLWC	0	0	152	519	268
MCLMLPAYPFLIC	0	0	185	555	266
MYLIIPVFPFFIC	0	0	47	154	266
MCLFLPVFPFLVC	0	0	218	581	265
MCLIIPVFPYWLC	0	0	87	352	265
MCPMLSWPYSNIC	0	0	156	551	265
MCLILPFFPYFIC	0	0	33	168	264
MCFSFIACFPLCC	0	21	689	895	263	ZMCFSFIACFPLCCGSGSDYKDDDDK	1	Crude	Selection
MCLLLPLFPFFIC	0	0	71	294	263
MSLIIPVFPFFIC	0	0	40	158	263
MCCFSYYFCLVSC	0	19	579	901	261
MCLMLPVHPFLIC	0	0	165	586	261
MCFQYFHMLWPFC	0	0	57	246	260
MCFQYFHILWLFC	0	0	79	357	259	ZMCFQYFHILWLFCGSGSDYKDDDDK	1	Crude	Mutagenesis scan
MCLVLPIFPYFVC	0	0	27	167	257
MCLLFLLPYFTC	0	23	635	931	255
MCLMLPVYPFLTC	0	0	211	726	254
MCFLCLSMYLC	0	19	470	831	250
MCLMLSFLPYKIC	0	0	58	286	249
MCLFLPVFPYFVC	0	0	40	222	247
MCLILPVFPFLIC	0	0	29	222	243
MCFRFFTFLWPFC	0	21	505	852	241
MCFQNYLMYLIAC	0	3	289	670	240	ZMCFQNYLMYLIACGSGSDYKDDDDK	1	Crude	Selection
MCLLLPVFPYWLC	0	0	375	749	239
MCLMLSFLPYIIC	0	0	51	265	237
MRLMLSFLPYNIC	0	0	44	192	237
MCFVSFSVLWPFC	0	19	523	806	236
MCIALLGGQTLVWKC	0	4	274	693	236
MCLMLSYLPYNIC	0	0	55	284	235
MCIIIPVFPFFIC	0	0	42	144	234
MCLMLSIFPYFIC	0	0	4	66	233
MCQYLPFLLIPSC	0	0	176	642	231
MCPWLFSQFAFCC	0	3	289	697	230
MCLMLSWPYFIC	0	0	9	233	229
MCFYCIPAVLYLC	0	27	514	855	228
MCFQYFQILWPFC	0	0	56	275	225	ZMCFQYFQILWPFCGSGSDYKDDDDK	8.03914e-08	Crude	Mutagenesis scan
MCIFCHSFCSVFSC	0	2	63	252	225
MCLTLPVYPFLIC	0	0	125	365	224
MCLILPIFPYVIC	0	0	27	169	223
MCLILPTFPFFIC	0	0	41	219	221
MCLIIPVFPYFVC	0	0	3	49	220
MCLFLPVFPYWRC	0	2	158	590	218	ZMCLFLPVFPYWRCGSGSDYKDDDDK	1	Crude	Selection
MCLVLPVFPFFIC	0	0	10	114	218
MCLIRPIFPYFIC	0	0	29	134	217
MCLMLPVYPFLSC	0	0	155	501	217
MCPCSFFPIWIFC	0	26	739	1077	217
MFLILPIFPYFIC	0	0	25	122	215
MCIFCHNFCSVFRC	0	0	64	212	213
MCIFCRSFCSVFRC	0	0	78	285	213
MCFAFFPLSLYLC	0	20	582	823	212
MCLMLPVFPFFIC	0	0	18	146	212
MCFIHWGMLWPFC	0	2	293	582	208
MCLFLPVFPFFGC	0	0	109	481	208
MCLIIPVFPFFAC	0	0	12	150	208
MCLFLPVYPFFDC	0	0	86	415	207
MCLLLPLFPYFIC	0	0	53	288	206
MCPMLPVYPFLIC	0	2	149	462	205
MCPWLFSPFMFFC	0	25	1119	1171	205
MCVSFYACFPLMC	0	0	167	474	205
MCLYFSECVFAAC	0	0	108	392	204
MCLILPLFPFFIC	0	0	114	311	203
MCLMLSFLPFNIC	0	0	54	149	202
MCSFLPVYPFFIC	0	0	6	114	201
MCLILPSFPYFIC	0	0	29	129	200
MYLMLSFLPYNIC	0	0	31	121	200
MCIFCHSFCSVFCC	0	0	57	282	198
MCIFCHSFCNVFRC	0	0	53	217	197
MCLYLPVFPFFAC	0	0	160	539	197
MCFSFYACFPLHC	0	0	190	453	196
MCLFLSVFPYFIC	0	8	301	597	195
MCLIIPVFPLYC	0	0	24	254	195
MCLILPFLPYNIC	0	0	4	77	195
MCLMLSWPYSSIC	0	0	91	315	195
MCVIIPVFPFFIC	0	0	26	223	194
MCLFLPVYPFFTC	0	0	9	129	193
MCLILPIFPYLVC	0	0	16	121	193
MCLVLPTFPFFVC	0	0	173	429	192
MCRFLPIWSLLLC	0	47	1044	1150	192
MCFTHFHVLWPLC	0	4	203	613	191
MCFPLVAYRLLLC	0	65	854	1020	190
MCLIIPVFPFLVC	0	0	23	163	190
MCLIIPVFPFFICGC	0	0	24	231	188
MCLVLPVYPFFVC	0	0	71	229	187
MCLMFQPFYSNVC	0	0	85	343	186
MCLMLSWPYFNIC	0	0	80	238	186
MCIFCHSFCGVFRC	0	0	62	258	184
MCISFMVCFPFLC	0	7	574	802	184
MCLFLPVLPFFVC	0	0	136	413	184
MCIFCHSFCSVYRC	0	0	69	260	183
MCLKLSFLPYNIC	0	0	33	179	183
MCLILSWPYSNIC	0	0	71	272	182
MCLMLSWPHSNIC	0	0	81	331	182
MCLMLPFLPYFIC	0	0	0	49	181
MCCFSFFACFLTC	0	14	515	682	180
MCLFLPVHPFFIC	0	0	7	88	180
MCFQYFHILWSFC	0	0	69	221	179	ZMCFQYFHILWSFCGSGSDYKDDDDK	1	Crude	Mutagenesis scan
MCMNFLTCVWMARFC	0	0	77	343	179
MCFIRWDMLWPFC	0	0	138	452	178
MCIFCHGFCSVFRC	0	0	38	198	178
MCFKYFHILWPFC	0	0	38	141	177	ZMCFKYFHILWPFCGSGSDYKDDDDK	9.28703e-08	Crude	Mutagenesis scan
MCLFLPVYPSFIC	0	0	6	110	177
MCPWAFTIFRFCC	0	2	292	536	177
MCYGYLPVFPWIFC	0	17	565	788	176
MCLIIPVFTFFIC	0	0	27	126	175
MCLFLPVFPLFVC	0	3	124	362	174
MCLIIPVYPFFVC	0	0	15	122	174
MCLIIPLFPFFIC	0	0	31	124	173
MCLILPIFPFLIC	0	0	43	195	173
MCLLLPLFPWFAC	0	2	168	558	173
MCLMLSWPYSNSC	0	0	129	382	170
MCFLYFHILWPFC	0	0	53	214	169	ZMCFLYFHILWPFCGSGSDYKDDDDK	1	Crude	Mutagenesis scan
MCFSFYACFPLCC	0	2	141	376	169
MCLFLPVYPFSIC	0	0	5	125	168
MCLVLPLFPFLIC	0	0	152	400	168
MCLLLSFLPYNIC	0	0	46	144	167
MCLMLFFLPYNIC	0	0	40	180	166
MCLFLPVFPYWHC	0	0	123	484	165
MCLILRIFPYFIC	0	0	20	82	165
MCLFLPVSPFFVC	0	0	125	394	164
MCVNFLTCVWMARLC	0	0	137	342	164
MCLILPIYPFFIC	0	0	0	47	163
MCLVLPIFPLFVC	0	2	152	473	163
MCLIIPVFPLLC	0	0	24	182	162
MCLILAIFPYFIC	0	0	20	97	162
MCLILPLFPFLIC	0	0	113	337	162
MCHFLPFLLVPFC	0	22	446	628	161	ZMCHFLPFLLVPFCGSGSDYKDDDDK	6.57e-07	Crude	Selection
MCGFLPFLLVPWC	0	17	948	916	161
MCMSFYACFLSLC	0	19	404	604	161
MCLILPTFPYFVC	0	0	17	116	160
MCLVLPILPFFVC	0	0	171	425	160
MCLYLPVFPFLIC	0	0	50	193	160
MCLFLPVCPFFVC	0	0	96	263	159
MCFTHWDMLWPIC	0	0	14	171	156
MCLIIPTFPWILC	0	0	125	333	155
MCLMLSWPYSDIC	0	0	86	283	155
MCPVLPIFPFFVC	0	0	135	378	154
MCSFLPVFPFFVC	0	0	91	295	154
MCCNCLPLSLLLMC	0	2	397	614	153
MCLILPIFPYCIC	0	0	23	157	153
MCLMLSFLPNNIC	0	0	28	182	152
MCFMLSWPYSNIC	0	0	71	238	150
MCLSLPVFPFFVC	0	0	110	298	150
MCLVLPIFPFLIC	0	0	13	128	150
MCCFMPVPFVLLC	0	35	580	702	149
MCLILPIVPYFIC	0	0	25	106	149
MCLIIPIFPWIMC	0	0	102	246	147
MCLMLSWPYSNNC	0	0	66	353	147
MCLVFAYSGLMSC	0	21	580	678	147
MCTFGICFFYAC	0	11	685	778	147
MCIFLPLFPYFVC	0	10	423	597	146
MCLMLPVYPFHIC	0	0	62	332	146
MCLVLLGYQPIPLLC	0	0	206	541	145
MCCFSFLNCYIFSC	0	18	473	610	144
MCLILPIFPYIC	0	0	8	108	144
MCLIIPVLPFFVC	0	0	12	106	143
MCLVPPIFPFFVC	0	0	136	371	143
MCVSFYACFPLVC	0	0	56	311	143
MCWPMIYWSLLLC	0	47	610	742	143
MCICFTSRCIC	0	12	279	492	142	ZMCICFTSRCICGSGSDYKDDDDK	1	Crude	Selection
MCALFPFPYSFTVC	0	0	129	362	142
MCLFLPAFPFFVC	0	2	119	315	142
MCLMLPVYPFLLC	0	0	73	336	142
MCLFLPVFPFSVC	0	0	95	304	141
MCLILPIFPYFAC	0	0	12	157	140
MCLMLSFLHYNIC	0	0	41	102	140
MCIRLNLLLPYTC	0	2	61	265	139
MCLFLPCFPFFVC	0	25	518	739	139
MCLILPILPYFVC	0	0	7	79	139
MCLVLSWPYSNIC	0	0	60	239	139
MCLILPLFPYFIC	0	0	11	98	138
MCLILPLYPYLLC	0	12	736	762	138
MCLILPMFPYFIC	0	0	18	111	138
MWLILPIFPYFIC	0	0	6	60	138
MCALFPFPYSFTTC	0	2	167	473	137
MCLLIPFLPRNIC	0	30	810	836	137
MCLMLSILPYNIC	0	0	28	117	136
MCLSLPIFPYFIC	0	0	12	91	136
MCLVLPVYPFFIC	0	0	3	60	136
MCLWHRAWSYNIC	0	0	27	223	136
MCYVWRQMLRC	0	0	67	374	135	ZMCYVWRQMLRCGSGSDYKDDDDK	1	Crude	Selection
MCLVLPIFPFSVC	0	0	131	326	135
MSLMLSFLPYNIC	0	0	23	105	135
MCFFHPYSFVVFC	0	11	308	409	134	ZMCFFHPYSFVVFCGSGSDYKDDDDK	6.741e-05	Crude	Selection
MCLIIPVFPWILC	0	0	64	186	134
MCLMLSFFPYNIC	0	0	16	111	134
MCLFLPVLPYWLC	0	0	196	474	133
MCLMLPVFPFLIC	0	0	44	162	133
MCLMLSFLTYNIC	0	0	29	104	133
MCMFLPFLLMPIC	0	2	20	194	133
MCRFLYFPLWYLC	0	14	624	649	133
MCYVWRQMLPC	0	2	148	523	133
MCLSLPVFPYWLC	0	0	154	414	132
MCLMLSWPYTNIC	0	0	65	182	131
MCLFLPAFPYWLC	0	0	160	387	130
MCLFPPVFPYWLC	0	0	197	488	130
MCLIIPVFPFVIC	0	0	19	113	130
MCLVLPISPFFVC	0	0	147	366	130
MCLFLPVFPSFVC	0	2	83	305	129
MCLFLPVSPYWLC	0	0	184	373	129
MCLMLPFLPYNVC	0	0	4	74	129
MCFHLPYLLIPFC	0	17	319	536	126
MCLIIPGFPFFIC	0	0	20	93	126
MCLFLPIYPFFVC	0	0	50	216	125
MCFIHWEMLWPFC	0	0	94	258	124	ZMCFIHWEMLWPFCGSGSDYKDDDDK	1	Crude	Selection
MCMNFLTCVWMARRC	0	0	66	226	124
MCRIIPVFPFFIC	0	0	25	105	124
MCLIIPAFPFFVC	0	0	4	85	123
MCLIIPVFPYWIC	0	0	5	32	123
MCLFIPVYPFFVC	0	0	49	239	122
MCLFQPVYPFFVC	0	0	59	202	122
MCLILPIYPFFVC	0	0	15	88	122
MCLVLPIFPSFVC	0	0	129	308	122
MCFQYFYILWPFC	0	0	43	157	121	ZMCFQYFYILWPFCGSGSDYKDDDDK	1	Crude	Mutagenesis scan
MCLILPICPYFIC	0	0	18	101	121
MCLMLPFPYYIIC	0	24	407	474	121
MCLMLSFLPSNIC	0	0	17	107	120
MCFMLSFLPYNIC	0	0	27	120	119
MCIQYFHILWPFC	0	0	41	187	118	ZMCIQYFHILWPFCGSGSDYKDDDDK	5.88171e-08	Crude	Mutagenesis scan
MCCFYLFPYFFYC	0	12	462	505	118
MCLTLPVFPYFIC	0	0	10	73	118
MCVSYLACFPWTC	0	0	120	305	118
MCFQYFLILWPFC	0	0	50	178	117	ZMCFQYFLILWPFCGSGSDYKDDDDK	1	Crude	Mutagenesis scan
MCLIIPVCPFFIC	0	0	15	100	117
MCLILPLFPYFLC	0	3	290	465	117
MCLILPVLPYFIC	0	0	17	64	117
MCQYLPFLLIPCC	0	5	89	264	117
MCLIIPVFPLFVC	0	0	9	89	116
MCLMLSFLPYNICGC	0	0	10	139	116
MCPFLPVFPYWLC	0	0	128	360	116
MCIFCHSFCSVFVC	0	0	10	79	115
MCLFLPVYPFFFVC	0	0	2	81	115
MCLFLPVYPFYVC	0	0	44	188	115
MCLIIPVFPCFIC	0	0	16	111	114
MCLIIPVFPYYIC	0	0	26	68	114
MCLFLSVYPFFVC	0	0	45	170	113
MCLIIPVSPFFVC	0	0	11	81	113
MCLILPIFRYFIC	0	0	10	57	113
MCLMLSFLPYSNIC	0	0	4	150	113
MCLPWFILRSVAC	0	0	184	476	113
MCPWIFSDYSFIC	0	0	19	184	113
MCLFLPVYPFFFC	0	0	39	197	112
MCLFLPVYPYFLC	0	3	343	442	112
MCLIIPIFPFFVC	0	0	40	88	112
MCLIIPIFPWISC	0	0	117	382	112
MCLMLQPFYSNIC	0	2	161	248	112
MCCFSFYFCPIIC	0	0	28	157	111
MCLYLPVYPFFVC	0	0	53	234	111
MCFIHWDMLWLIC	0	0	0	78	110	ZMCFIHWDMLWLICGSGSDYKDDDDK	1	Crude	Selection
MCFQYFHIHWPFC	0	0	37	146	110	ZMCFQYFHIHWPFCGSGSDYKDDDDK	1	Crude	Mutagenesis scan
MCFQYYHILWPFC	0	0	28	119	110	ZMCFQYYHILWPFCGSGSDYKDDDDK	6.5548e-08	Crude	Mutagenesis scan
MCLFLPVFPWFVC	0	0	32	151	110
MCLIIPIFPWTLC	0	0	108	211	110
MCLIMPVFPFFIC	0	0	17	86	110
MCLTLPIFPYFVC	0	0	3	88	110
MCRFLPFLLQPIC	0	0	27	203	109	ZMCRFLPFLLQPICGSGSDYKDDDDK	1	Crude	Selection
MCLIIPVFPFCIC	0	0	17	99	109
MCFQYFNILWPFC	0	0	29	103	108
MCIFLPLFPYFIC	0	0	18	98	108
MCFQYFHFLWPFC	0	0	67	163	107	ZMCFQYFHFLWPFCGSGSDYKDDDDK	9.02017e-08	Crude	Mutagenesis scan
MCLFSPVFPFFVC	0	0	96	253	107
MCLSIPVFPFFIC	0	0	9	83	107
MCLYLPIFPYFIC	0	0	12	92	107
MCVSYLACFPLYC	0	0	19	145	107
MCVSYLACFPWAC	0	0	99	292	107
MCLMLSFFLPYNIC	0	0	0	57	106
MCLMLSWPCSNIC	0	0	51	222	106
MCWILIPYPDQNWAC	0	19	294	429	106
MCFSNILAFVFSC	0	8	252	391	105	ZMCFSNILAFVFSCGSGSDYKDDDDK	1	Crude	Selection
MCLMLPVYPYLIC	0	0	29	121	105
MCIFCHSFCSMFRC	0	0	25	138	104
MCLMLSFLPYHIC	0	0	23	80	104
MCLVIPIFPWILC	0	0	103	214	104
MCLMLSWPFC	0	0	16	130	103	ZMCLMLSWPFCGSGSDYKDDDDK	1	Crude	Selection
MCFQYFHILCPFC	0	0	28	117	103
MCLILPIFPDFIC	0	0	18	73	103
MCLVLEYSRLVSC	0	2	292	511	103
MCLVLPVFPYFIC	0	0	11	77	103
MCTFGICFTFSFC	0	13	303	421	103
MCLFLPVLPFFIC	0	0	5	68	102
MCFIHWDMLWSFC	0	0	61	191	101
MCLIIPILPWILC	0	0	89	254	101
MCLILPVFPYFMC	0	0	13	105	101
MCLMLAFLPYNIC	0	0	19	74	101
MCLRLSFLPYNIC	0	0	17	85	101
MCLYLPVFPFFRC	0	0	53	218	101
MCFIHWDLLWPFC	0	0	86	186	100
MCFSFYACFPLLC	0	0	37	142	100
MCIFCHSFCRVFRC	0	0	41	168	100
MCLMLFWPYSNIC	0	0	27	117	100
MCLMVSFLPYNIC	0	0	12	78	100
MCLFLPVYPFYIC	0	0	0	36	99
MCLILPAFPYFIC	0	0	10	59	99
MCLLLPLFPWFLC	0	0	65	220	99
MCLLMPFPYSFVC	0	15	316	505	99
MCAPFPFPYSFTIC	0	0	124	260	98
MCFFCHSFCSVFRC	0	0	31	131	98
MCLIIPIFPWIWC	0	0	67	245	98
MCLIIPISPWILC	0	0	96	190	98
MCFIHWDMLWLFC	0	0	77	228	97
MCLLLPLFPFFVC	0	0	66	205	97
MCLMLTMFNYHVNIC	0	0	35	149	97
MCTFLLFYSDLSC	0	17	338	457	97
MCLILWPFC	0	0	4	26	96	ZMCLILWPFCGSGSDYKDDDDK	1	Crude	Selection
MCFLAFHYLWPIC	0	0	18	146	96
MCIFYHSFCSVFRC	0	0	27	127	96
MCLFLPVCPFFIC	0	0	3	44	96
MCLMIPVFPFFIC	0	0	9	73	96
MCFQYFHILWQFC	0	0	31	97	95	ZMCFQYFHILWQFCGSGSDYKDDDDK	1	Crude	Mutagenesis scan
MCFTHFHVLWPSC	0	0	61	269	95	ZMCFTHFHVLWPSCGSGSDYKDDDDK	1	Crude	Selection
MCALFPLPYSFTIC	0	0	137	344	95
MCLFLPVFPLFIC	0	0	7	62	95
MCLFLPVFPYRLC	0	0	149	376	95
MCLILPIFAYFIC	0	0	11	45	95
MCLMLPVCPFLIC	0	0	62	194	95
MCPILPIFPYFVC	0	0	8	70	95
MFLIIPVFPFFIC	0	0	18	69	95
MCFQYIHILWPFC	0	0	25	137	94	ZMCFQYIHILWPFCGSGSDYKDDDDK	1	Crude	Mutagenesis scan
MCFQYIHILWPFC	0	0	25	137	94	ZMCFQYIHILWPFCGSGSDYKDDDDK	1	Crude	Selection
MCCNCLPLSLLFVC	0	0	20	129	94
MCIFCHSFYSVFRC	0	0	22	105	94
MCLFLPVFPYWVC	0	0	77	162	94
MCLIFTYSKLLPC	0	0	54	214	93
MCFIHWVMLWPFC	0	0	127	214	92
MCFYFGYHLAPC	0	8	189	262	92
MCLFLPVYSFFVC	0	0	35	146	92
MCLTIPVFPFFVC	0	0	4	76	92
MCLYLPVFPFFPC	0	0	70	270	92
MCFQYFHIIWPFC	0	0	25	106	91	ZMCFQYFHIIWPFCGSGSDYKDDDDK	8.60961e-08	Crude	Mutagenesis scan
MCLILPISPYFVC	0	0	5	76	91
MCMMLPVFPFIIC	0	0	112	241	91
MCFFHWDMLWPFC	0	0	46	134	90	ZMCFFHWDMLWPFCGSGSDYKDDDDK	7.4e-08	Crude	Selection
MCLFLPYNIC	0	0	4	77	90	ZMCLFLPYNICGSGSDYKDDDDK	1	Crude	Selection
MCLIHWDMLWPIC	0	0	5	94	90
MCLIIPVFPSFVC	0	0	6	63	90
MCLILPVYPYFIC	0	0	2	26	90
MCLMLTWPYSNIC	0	0	29	117	90
MCLVLPIFPFFGC	0	0	37	212	90
MCQYLPFLLTPFC	0	0	89	214	90
MCVSYLACFPWIC	0	0	8	97	90
MCQLFFYPAFWFC	0	14	396	431	89	ZMCQLFFYPAFWFCGSGSDYKDDDDK	1.568e-06	Crude	Selection
MCLIPPIFPYFVC	0	0	11	68	89
MCLMLPSLPYNIC	0	0	8	47	89
MCLYLPVYPFFIC	0	0	5	48	89
MCPIIPVFPFFVC	0	0	5	75	89
MCQYLPSLLIPFC	0	0	83	217	89
MCWPLQPWRLMSC	0	22	647	814	89
MCALLPFPYSFTIC	0	0	117	299	88
MCFRFFSLLWPLC	0	0	91	288	88
MCGSLPFLLMPFC	0	12	263	371	88
MCLMLSWPYNIC	0	0	2	85	88
MCLYLPVFPFLVC	0	0	145	307	88
MCMNFLTCVWMARHC	0	0	61	224	88
MCFQNYLLFLPLC	0	16	221	308	87	ZMCFQNYLLFLPLCGSGSDYKDDDDK	1	Crude	Selection
MCALFPFPYSLTIC	0	0	106	293	87
MCFQNYLMYLIIC	0	0	10	73	87
MCLIIPVFPFC	0	0	5	68	87
MCLILPVFPYYIC	0	0	3	46	87
MCLMLSWSYSNIC	0	0	41	135	87
MCMNFLTCVWMARPC	0	0	73	323	87
MCFSYFACFPLLAC	0	5	207	307	86
MCIFCLSFCSVFRC	0	0	28	129	86
MCLIIPVFRFFIC	0	0	7	69	86
MCLILPIFPHFVC	0	0	7	62	86
MCLILPVFPYWLC	0	0	76	168	86
MCLITPVFPFFVC	0	0	7	104	86
MCLMLPWLSSHMC	0	0	71	249	86
MCALFPFPYSFTNC	0	0	64	307	85
MCALFPFPYSFTSC	0	0	81	292	85
MCIFLPIFPYFIC	0	0	7	39	85
MCLFLPVYPFIVC	0	0	44	114	85
MCLILPIFPYSVC	0	0	7	54	85
MCLIVPIFPYFIC	0	0	8	59	85
MCMFLPVYPFFVC	0	0	42	177	85
MCPFLYNFSWLVC	0	21	290	431	85
MCWSELVYKAMLAC	0	27	656	640	85
MCLFLPIFPFFVC	0	0	45	159	84
MCLILPIFPFLLC	0	0	94	215	84
MCLISPVFPFFIC	0	0	11	71	84
MCLLPMLNLLFSC	0	15	415	480	84
MCLSFYACFPLYC	0	2	125	244	84
MCLYLPVFPFFGC	0	0	66	227	84
MCSYMLLPLFFLC	0	31	727	514	84
MCALFPFPYPFTIC	0	0	90	177	83
MCFQYFHNLWPFC	0	0	26	79	83
MCFVCLGQYFSYRAC	0	28	460	446	83
MCLALPIFPFFVC	0	3	96	238	83
MCLIPVFPFFIC	0	0	10	55	83
MCLMFSFLPYNIC	0	0	30	79	83
MCLSLPVFPFFIC	0	0	6	57	83
MCLVLPLLPFFIC	0	0	86	191	83
MCALFPSPYSFTIC	0	0	105	257	82
MCLILPVFPHFIC	0	0	6	49	82
MCLMLYFLPYNIC	0	0	17	69	82
MCLYLPVLPFFIC	0	0	21	80	82
MCIFCYSFCSVFRC	0	0	14	101	81
MCLSFLACFPNFC	0	12	341	427	81
MCRYLPFLLIPFC	0	0	176	252	81
MCYILLTQLLAYC	0	17	796	597	81
MCCNCLPLSLLLVC	0	0	94	242	80
MCFQNFHILWPFC	0	0	21	93	80
MCLLCSLLPYFTC	0	15	391	341	80
MCLLFLFSKMLNC	0	18	256	298	80
MCLMLPVYLFLIC	0	0	57	205	80
MCLMLSWPYSNFC	0	0	30	179	80
MCMMMMPYQRNLC	0	18	310	468	80
MCQYLPLLLIPFC	0	2	85	225	80
MCLFLLVYPFFVC	0	0	41	140	79
MCLFLPVYPIFVC	0	0	26	113	79
MCFQYFHILWTFC	0	0	15	77	78	ZMCFQYFHILWTFCGSGSDYKDDDDK	1	Crude	Mutagenesis scan
MCIFCHSFCSVIRC	0	0	22	76	78
MCLFLPVSPFFIC	0	0	6	63	78
MCLILPVSPYFIC	0	0	9	60	78
MCLVPPLFPFFIC	0	0	70	185	78
MCCFMLYPTLMLC	0	4	197	317	77
MCCFSYYFCLVPC	0	2	128	226	77
MCFIHWDMLWPPC	0	0	57	219	77
MCFLCLPMFFLPC	0	2	130	206	77
MCIRLNSLLPYIC	0	0	63	142	77
MCLIIPVLPYFIC	0	0	4	15	77
MCLILAPQYPNAC	0	0	79	248	77
MRFQYFHILWPFC	0	0	28	96	77
MRLFLPVYPFFVC	0	0	30	90	77
MCALSPFPYSFTIC	0	0	89	227	76
MCLFLPVFPHWLC	0	0	86	254	76
MCLILPVFPYSIC	0	0	3	62	76
MCVRLNLLLPYIC	0	0	43	180	76
MCFQYFHILLPFC	0	0	17	62	75	ZMCFQYFHILLPFCGSGSDYKDDDDK	1	Crude	Mutagenesis scan
MCAFYFPFSLYVC	0	11	289	356	75
MCLIIPIFPRILC	0	2	92	172	75
MCLMLPVYPFLNC	0	2	72	283	75
MCLMSPFLPYNIC	0	0	7	50	75
MCVSLYACFPLLC	0	2	84	214	75
MCTRLNLLLPYIC	0	0	36	110	74	ZMCTRLNLLLPYICGSGSDYKDDDDK	1	Crude	Selection
MCFILPVFPYLIC	0	2	131	200	74
MCFVFTFSRLLFC	0	0	21	109	74
MCIICHSFCSVFRC	0	0	24	85	74
MCLIIPVFPFSVC	0	0	2	52	74
MCMFLPFLLMPLC	0	0	45	182	74
MCFHYFAFLWPFC	0	11	143	247	73
MCLFLPVFPFFDC	0	0	41	192	73
MCLFLPVFPFFMC	0	0	9	82	73
MCLILPVFPYFTC	0	0	11	88	73
MCLVIPVFPFFVC	0	0	0	36	73
MCLYLPVFPLFVC	0	0	85	218	73
MCLYLPVFPYWLC	0	0	86	166	73
MCYIHWDMLWPFC	0	0	58	146	73
MCLITPIFPWILC	0	2	80	196	72
MCLLFLLPYFIC	0	0	18	125	72
MCPWLFTRFSFFC	0	0	99	211	72
MCQYLPFLPIPFC	0	0	69	179	72
MCQYSPFLLIPFC	0	0	59	192	72
MCVSFYACLPLLC	0	0	86	180	72
MCIRLNLLLPYFIC	0	0	7	63	71
MCIRLNLLPPYIC	0	0	43	146	71
MCISFYACFPLLC	0	0	63	158	71
MCLIIPVFPFFGC	0	0	9	44	71
MCLLLPLFPWFGC	0	0	88	265	71
MCLYFSECVLLLC	0	0	51	106	71
MCLYLPAFPFFVC	0	0	69	166	71
MCVSFYACFPPLC	0	0	77	184	71
MCWMLSFLPYNIC	0	0	15	80	71
MCWPMTWWRLILC	0	30	496	594	71
MCFQYFHILWPPC	0	0	14	95	70	ZMCFQYFHILWPPCGSGSDYKDDDDK	5.45283e-08	Crude	Mutagenesis scan
MCHMLSWPYSNIC	0	0	33	106	70	ZMCHMLSWPYSNICGSGSDYKDDDDK	1	Crude	Selection
MCYQYFHILWPFC	0	0	21	93	70	ZMCYQYFHILWPFCGSGSDYKDDDDK	2.77692e-07	Crude	Mutagenesis scan
MCFILPIFPYFVC	0	0	0	33	70
MCLIIPIFPWVLC	0	0	68	169	70
MCLIIPVFPFFFIC	0	0	0	27	70
MCLMLSWPYSYIC	0	0	22	113	70
MCLPWFILRSVMC	0	0	145	293	70
MCLVLPLFPFFTC	0	0	69	225	70
MCLVLPLFPLFIC	0	0	68	150	70
MCMFLPVYPFFIC	0	0	3	32	70
MCSFLPVFPFFIC	0	0	0	47	70
MCSMLPFLPYNIC	0	0	3	38	70
MCYVWRRMLLC	0	0	135	244	70
MCFRFFPLLWPFC	0	0	122	248	69
MCFSFYACLPLYC	0	0	54	133	69
MCIFCHSFCCVFRC	0	0	30	94	69
MCLFLPIYPFFIC	0	0	3	37	69
MCLLAFGPWTTLFVC	0	0	24	132	69
MCLMLSWPYSIIC	0	0	39	115	69
MCLWHRAWSYYVC	0	0	30	156	69
MCFQYFHIFWPFC	0	0	21	91	68	ZMCFQYFHIFWPFCGSGSDYKDDDDK	1	Crude	Mutagenesis scan
MCLFLPAFPFFIC	0	0	5	67	68
MCLFLPVFLFFVC	0	0	36	139	68
MCLILPIFPFFPC	0	0	43	179	68
MCLILPLFPYAIC	0	0	73	133	68
MCLMLPFLPYNTC	0	0	6	71	68
MCLVLPIFPWFVC	0	0	13	81	68
MCLVLPPFPFFIC	0	2	68	224	68
MCMFLPFLLMPYC	0	0	93	194	68
MCPVLPLFPFFIC	0	0	56	164	68
MCFAFFPLSLFLC	0	12	199	285	67
MCFTHFHVLWPIC	0	0	26	137	67
MCLLLPVFPYWIC	0	0	13	61	67
MCRFLHPFGLYIC	0	0	28	141	67
MCVSYLACLPWSC	0	0	75	199	67
MCCFSFVACFPC	0	14	173	261	66
MCLIIAVFPFFIC	0	0	7	37	66
MCLIIPVFAFFIC	0	0	6	26	66
MCLILCFSKLMSC	0	12	194	258	66
MCLMLSFLPYNLC	0	0	20	118	66
MCLYLPVFPLFIC	0	0	13	64	66
MCIPFWILLSLHC	0	13	202	252	65	ZMCIPFWILLSLHCGSGSDYKDDDDK	1	Crude	Selection
MCFILPVFPYFIC	0	0	2	39	65
MCFTHWDMLWPLC	0	0	25	127	65
MCIFSHSFCSVFRC	0	0	26	94	65
MCLFLPVFPSFIC	0	0	4	55	65
MCLFLPVNPFFVC	0	0	29	122	65
MCLLLPIFPYFIC	0	0	8	71	65
MCLLLPTFPFYVC	0	11	245	287	65
MCLMLPFSPYNIC	0	0	2	35	65
MCLMLPWLSSHVC	0	0	31	147	65
MCLYLPVFPYFVC	0	0	36	100	65
MCLYLPVLPFFVC	0	0	81	222	65
MCPWLFSPFMFIC	0	0	25	136	65
MCSYMLFWIC	0	0	18	133	65
MCVMLSFLPYNIC	0	0	12	80	65
MYIFCHSFCSVFRC	0	0	11	53	65
MCFACPLLFCIFYC	0	10	290	307	64
MCFSLYACFPLYC	0	0	61	144	64
MCIIHWDMLWPFC	0	0	51	118	64
MCLALPLFPFFIC	0	0	36	120	64
MCLFLSVYPFFIC	0	0	2	27	64
MCLFQPVYPFFIC	0	0	2	33	64
MCLILPIFPYWLC	0	0	30	70	64
MCLILPTFPYLIC	0	0	11	47	64
MCLIPPVFPYFIC	0	0	6	57	64
MCLLLPVYPFLIC	0	0	38	108	64
MCPWLFTQFAFWC	0	0	56	97	64
MCPYLPVFPFFVC	0	0	78	218	64
MCTFGLCFSLVSC	0	16	200	232	64
MFLMLSFLPYNIC	0	0	7	49	64
MCFIHWDMHWPFC	0	0	40	129	63
MCLFLPVYLFFVC	0	0	17	104	63
MCLMLPVYPFLFC	0	0	47	243	63
MCPILPVFPYFIC	0	0	6	49	63
MCRFLPFLLQPYC	0	0	102	167	63
MCCWSFYACFFGC	0	16	396	312	62
MCFSFYACFPSYC	0	0	81	168	62
MCIFCHSFCSVFQC	0	0	21	63	62
MCLFLPVFPYWMC	0	0	27	140	62
MCLMLPFLPHNIC	0	0	2	39	62
MCLMLPFLPYNMC	0	0	8	81	62
MCLVLPLSPFFIC	0	0	54	152	62
MCFFWLVPFC	0	12	128	194	61
MCLLLPPFPWFVC	0	0	74	196	61
MCLMLPLLPYNIC	0	0	10	54	61
MCLVLPLFPSFIC	0	0	57	117	61
MCLYPPVFPFFVC	0	0	59	190	61
MCPWALTIFRFWC	0	0	99	152	61
MRIFCHSFCSVFRC	0	0	18	72	61
MCFIHCDMLWPFC	0	0	42	157	60
MCFIHWDMFWPFC	0	0	57	124	60
MCIFIPVFPFFIC	0	0	2	17	60
MCIYCHSFCSVFRC	0	0	23	75	60
MCLFLPCFPFFIC	0	0	27	140	60
MCLFSPVFPFFIC	0	0	2	47	60
MCLIIPVFPYLIC	0	0	6	34	60
MCLMFQPLYSNIC	0	0	61	110	60
MCLMLSWLYSNIC	0	0	26	111	60
MCLMWSFLPYNIC	0	0	13	73	60
MCLYLPVSPFFVC	0	0	65	175	60
MCQHLPFLLIPFC	0	0	106	209	60
MCFINWDMLWPFC	0	0	60	114	59	ZMCFINWDMLWPFCGSGSDYKDDDDK	7.11e-07	Crude	Selection
MCALFPFPYSFTFC	0	0	29	159	59
MCALFPFPYSSTIC	0	0	79	150	59
MCFIHFSFLWPLC	0	2	32	158	59
MCGFILFAQLMAC	0	10	199	242	59
MCIFCHSFCSEFRC	0	0	25	85	59
MCLFLPVFPFSIC	0	0	5	42	59
MCLFLPVYTFFVC	0	0	24	76	59
MCLIIPAFPYFIC	0	0	0	19	59
MCLILAPQYPNMC	0	0	45	167	59
MCLVLPLFPFSIC	0	0	53	142	59
MCQMLPVYPFLIC	0	0	41	115	59
MCALFPFPYFIC	0	0	11	103	58	ZMCALFPFPYFICGSGSDYKDDDDK	1	Crude	Selection
MCFPYFIC	0	0	0	20	58	ZMCFPYFICGSGSDYKDDDDK	1	Crude	Selection
MCIFCHSFSSVFRC	0	0	16	91	58
MCLILPIYPYFVC	0	0	0	22	58
MCLVLPVFPFLIC	0	0	12	55	58
MCSIIPIFPWILC	0	0	65	146	58
MSFQYFHILWPFC	0	0	14	72	58
MCASFYACFPLLC	0	0	51	135	57
MCFQYFHILWPC	0	0	21	112	57
MCLFLPVYHFFVC	0	0	26	77	57
MCLFLPVYPFFSC	0	0	7	59	57
MCLILPIFPYSFTIC	0	0	21	90	57
MCLMLPVYPYFIC	0	0	2	22	57
MCLTIPIFPWILC	0	0	56	157	57
MCLVLPIFLFFVC	0	0	37	128	57
MCLYLPVFPFLLC	0	0	57	134	57
MCLYLPVFPFSVC	0	0	67	139	57
MCPPPPC	244	254	410	503	57
MCSSFYACFPLYC	0	0	61	122	57
MCYVWRQMLFC	0	0	37	189	57
MGLILPIFPYFIC	0	0	3	33	57
MYFQYFHILWPFC	0	0	25	64	57
MCFIHFSLLWPFC	0	3	56	143	56
MCFTNFPLLWPFC	0	22	148	225	56
MCLFLPVFPFFTC	0	0	4	60	56
MCLIIPVFPFFPC	0	0	7	66	56
MCLIIRVFPFFIC	0	0	5	41	56
MCLILPIFFPYFIC	0	0	0	25	56
MCLMLPIFPFFVC	0	0	50	120	56
MCLMLSFLPYIC	0	0	5	57	56
MCLMLSVYPFLIC	0	0	24	105	56
MCLMLSWPYSKIC	0	0	34	110	56
MCLYLPVSPFFIC	0	0	11	67	56
MCVSFYACSPLLC	0	0	68	174	56
MCVSYLACFPWFVC	0	0	17	73	56
MCVSYPACFPWSC	0	0	70	174	56
MCFHYFHILWPFC	0	0	10	47	55	ZMCFHYFHILWPFCGSGSDYKDDDDK	1.2077e-08	Crude	Mutagenesis scan
MCFIHWDKLWPFC	0	0	52	134	55
MCFIHWDMLWHFC	0	0	48	109	55
MCFVLPIFPFFVC	0	0	46	123	55
MCIRLNLLLPHIC	0	0	14	94	55
MCLILPIFPYFIFC	0	0	3	27	55
MCLLLPLFPWSVC	0	0	58	158	55
MCLMFSWPYSNIC	0	0	27	114	55
MCLMHSWPYSNIC	0	0	26	92	55
MCLYFSECVFAVC	0	0	17	96	55
MCVSFYACFPLYC	0	0	45	111	55
MCVSSYACFPLLC	0	0	59	138	55
MCCNCLPLSLLLTC	0	0	90	259	54
MCFIHWDMLCPFC	0	0	36	121	54
MCLFVPVFPFFIC	0	3	97	145	54
MCLIIPIFPFFIC	0	0	3	22	54
MCLLLPLFPWLVC	0	2	161	274	54
MCLVFTFSRLLSC	0	0	40	117	54
MCLVLPFLPYNIC	0	0	5	26	54
MCVSYLACFPRSC	0	2	67	201	54
MCVSYLACSPWSC	0	0	70	178	54
MCLIFPCYPYFLC	0	14	134	191	53
MCLIVPVFPFFVC	0	0	0	53	53
MCLMFQPFYSNTC	0	0	32	109	53
MCLMLPVYQFLIC	0	0	20	78	53
MCLVLPLYPFFIC	0	0	30	63	53
MCLWHRAWSYYTC	0	0	52	184	53
MCQYLPFPLIPFC	0	0	56	166	53
MWLIIPVFPFFIC	0	0	7	43	53
MCCNCLPLPLLLIC	0	0	154	317	52
MCFTHLHVLWPFC	0	0	44	133	52
MCIRSNLLLPYIC	0	0	27	113	52
MCLFIPVYPYFIC	0	0	5	81	52
MCLFLPDYPFFVC	0	0	25	85	52
MCLLLPLLPWFVC	0	0	97	197	52
MCLMLSFLRYNIC	0	0	12	32	52
MCLCLPVFPFFIC	0	0	48	97	51
MCLFLPGYPFFVC	0	0	15	86	51
MCLLAFGPWTTLFIC	0	0	5	56	51
MCLTHFHVLWPFC	0	0	58	150	51
MCMFFHPFSLYIC	0	0	12	102	51
MCPFLGLFSFVFC	0	16	195	238	51
MCPWLFSQFAFRC	0	2	59	153	51
MCPYFWPTPFFFC	0	14	416	382	51
MCVSYLARFPWSC	0	0	53	153	51
MCFIHWDMLWPTC	0	0	8	110	50
MCLFLPIFPYFVC	0	0	5	29	50
MCLFLPVFLYWLC	0	0	52	148	50
MCLFLPVFPFYVC	0	0	41	100	50
MCLIFTYSKLLFC	0	0	22	128	50
MCLIIPVFPLLIC	0	0	9	46	50
MCLMLLVYPFLIC	0	0	16	85	50
MCLMLPVFPFFVC	0	0	25	109	50
MCQLLFYPAFWFC	0	0	102	153	50
MCYVWRQMLVC	0	0	22	155	50
MYLFLPVYPFFVC	0	0	16	74	50
MCFQYFPILWPFC	0	0	16	68	49	ZMCFQYFPILWPFCGSGSDYKDDDDK	2.79064e-08	Crude	Mutagenesis scan
MCFLCLPMFYYPC	0	0	66	204	49
MCFLLIPHLLWLC	0	8	116	192	49
MCLIIPVFPFLLC	0	0	17	76	49
MCLILPIFPYFGC	0	0	4	48	49
MCLITPVFPYFIC	0	0	2	19	49
MCLMFPFFIC	0	0	0	13	49
MCLTLPFLPYNIC	0	0	7	31	49
MCPWLFTCFSFVC	0	0	32	134	49
MCTIYFPWLWTMC	0	14	142	213	49
MCIFCHSYCSVFRC	0	0	18	86	48
MCIRLNLSLPYIC	0	0	25	117	48
MCISFMVCFPFIC	0	0	13	56	48
MCLFFHPFSLYIC	0	0	28	129	48
MCLFLPNWHLYTC	0	0	54	99	48
MCLIIPVFLFFVC	0	0	0	39	48
MCLMLPVYPFIIC	0	0	22	85	48
MCVSFYACFPFFVC	0	0	14	70	48
MSLFLPVYPFFVC	0	0	16	62	48
MCFLCLPMFFLAC	0	0	55	122	47
MCFLCLPMFFLVC	0	0	22	109	47
MCFLCLPMFYYIC	0	0	15	77	47
MCIFCQSFCSVFRC	0	0	12	58	47
MCILIAAFPWFIC	0	4	83	171	47
MCIRLNLLLPCIC	0	0	25	44	47
MCLFLTVYPFFVC	0	0	11	39	47
MCLIIPVSPYFIC	0	0	2	15	47
MCLILAPHYPNVC	0	0	39	119	47
MCLMHPVYPFLIC	0	0	21	86	47
MCLMLPFLPYSIC	0	0	3	34	47
MCLMLPVYSFLIC	0	0	27	85	47
MCLYLPVFPSFVC	0	0	57	175	47
MCCFSFYFCPILC	0	0	39	125	46
MCFIHWDMLRPIC	0	0	4	44	46
MCFIQWDMLWPFC	0	0	34	89	46
MCFTHFHVLWPYC	0	0	32	141	46
MCISYLACFPWSC	0	0	41	153	46
MCLILPTFPYFTC	0	0	4	37	46
MCLMLTMFNHHVNVC	0	0	42	89	46
MCLPLPLFPWFVC	0	0	82	164	46
MCLVFWHSIFC	0	10	187	190	46
MCFQFFHILWPFC	0	0	17	46	45	ZMCFQFFHILWPFCGSGSDYKDDDDK	2.70707e-08	Crude	Mutagenesis scan
MCPFGFTSFWFWC	0	23	294	286	45	ZMCPFGFTSFWFWCGSGSDYKDDDDK	1	Crude	Selection
MCFAFFDVLWPFC	0	0	23	58	45
MCFIIPVFPFFVC	0	0	5	32	45
MCFILWDMLWPFC	0	0	38	115	45
MCFLCLPMFYYRC	0	0	42	82	45
MCFMHWDMLWPFC	0	0	17	55	45
MCFQYFHILWPFCGC	0	0	9	72	45
MCFRFFSLLWPSC	0	0	43	133	45
MCFSFYACSPLYC	0	0	37	114	45
MCLVLPIFPVLVC	0	12	130	187	45
MCLVLPIYPFFVC	0	0	32	92	45
MCLYLPAFPFFIC	0	0	16	65	45
MCRFLPFLLQPLC	0	2	53	160	45
MCYVWQQMLLC	0	0	58	150	45
MCYVWRQMPLC	0	0	67	191	45
MRFIHWDMLWPFC	0	0	50	64	45
MSLMLSWPYSNIC	0	0	11	39	45
MCASYLACFPWSC	0	0	51	156	44
MCCFSFYYCLLSC	0	2	143	142	44
MCFIHLDMLWPFC	0	0	43	109	44
MCFIHWDMLWPMC	0	0	7	94	44
MCFLAFHYLWPLC	0	0	35	120	44
MCFVSFSVLWPIC	0	0	4	56	44
MCLFLPNWHLYPC	0	0	31	87	44
MCLFLPVYPFFVCGC	0	0	8	72	44
MCLILPIFPFFRC	0	0	24	123	44
MCLILPIFPYLMC	0	0	10	78	44
MCLILPILPYLIC	0	0	9	43	44
MCLILPTFPYFPC	0	0	30	130	44
MCLMFQPFYSNMC	0	0	33	161	44
MCLTLPIFPYLIC	0	0	7	50	44
MCRFLPFLLQPVC	0	0	8	68	44
MCSIHWDMLWPIC	0	0	0	47	44
MCVSHLACFPWSC	0	0	45	110	44
MRLFLPVYPFFIC	0	0	0	11	44
MSIFCHSFCSVFRC	0	0	7	29	44
MCFIHRDMLWPIC	0	0	2	44	43
MCFIHWDTLWPIC	0	0	8	66	43
MCFLCLPMFYYHC	0	0	60	143	43
MCLIIPVLPFLIC	0	0	6	43	43
MCLIIPVYPYFIC	0	0	0	10	43
MCLILPIFPSFIC	0	0	10	39	43
MCLILPIYPFLIC	0	0	9	37	43
MCLILPVFPYFLC	0	0	3	32	43
MCLIPPIFPYLIC	0	0	4	33	43
MCLMLCFLPYNIC	0	0	14	30	43
MCLMLPLFPFFIC	0	0	36	82	43
MCLYFSECVFLLLC	0	0	0	30	43
MCLYLPVFPFFTC	0	0	22	66	43
MCMFLPVFPFFVC	0	0	21	82	43
MCPWLFTCFSFLC	0	0	57	189	43
MCFIHWDMLLPFC	0	0	40	107	42
MCFSFYACFPWSC	0	0	21	84	42
MCLFLPVYSFFIC	0	0	0	30	42
MCLFLPVYTFFIC	0	0	0	8	42
MCLMLSVLPYNIC	0	0	4	56	42
MCLVIPVFPYFIC	0	0	0	7	42
MCLYLPVFPFSIC	0	0	11	49	42
MCLYPPVFPFFIC	0	0	15	59	42
MCPIIPVFPYFIC	0	0	0	18	42
MCSFVHAFSLYVC	0	0	71	124	42
MCFRLNLLLPYIC	0	0	14	65	41
MCLFLPIFPFFIC	0	0	3	20	41
MCLFLPVYLFFIC	0	0	3	24	41
MCLILPIFPFLVC	0	0	45	108	41
MCLLLPLSPWFVC	0	0	82	174	41
MCLLLPVYPYFIC	0	0	0	12	41
MCLMLPFLPCNIC	0	0	0	16	41
MCLMLPFLSYNIC	0	0	0	22	41
MCLMLSFLPYTIC	0	0	3	52	41
MCLMLSLPYNIC	0	0	5	38	41
MCLVLPIFPFFEC	0	0	79	180	41
MCPCLFIFGFPFC	0	7	147	207	41
MCQLFFYPAFWLC	0	0	108	131	41
MGLIIPVFPFFIC	0	0	5	23	41
MCCNCLPLSLLLSC	0	0	59	127	40
MCFSFYACFPWYC	0	0	13	33	40
MCHLLPFLLVPFC	0	2	102	158	40
MCIALLGGQTLVWSC	0	0	44	187	40
MCLFLLVYPFFIC	0	0	0	21	40
MCLFLPVFPCWLC	0	0	48	156	40
MCLFLPVYPFFNC	0	0	2	33	40
MCLFLSVFPFFVC	0	0	27	91	40
MCLIIPIFPYFVC	0	0	2	20	40
MCLILPTLPYFIC	0	0	3	27	40
MCLKLSWPYSNIC	0	0	13	69	40
MCLLLPLFPFLVC	0	0	31	97	40
MCLLLPLFPWLIC	0	0	8	52	40
MCLVLLGYQPIPLRC	0	0	20	113	40
MCLVLPIFPWILC	0	0	14	41	40
MCQYLPFLLVPFC	0	0	49	119	40
MCRFLHPFGLYLC	0	0	43	133	40
MCVQYFHILWPFC	0	0	16	41	39	ZMCVQYFHILWPFCGSGSDYKDDDDK	4.76789e-07	Crude	Mutagenesis scan
MCFSFYACFPLNC	0	0	20	89	39
MCIFCHSFCIVFRC	0	0	8	29	39
MCLFLPVFPYLIC	0	0	11	33	39
MCLIFTYSKLPSC	0	0	30	92	39
MCLIHWDMLWPLC	0	0	16	86	39
MCLIIPVFPFLMC	0	0	4	63	39
MCLLYFFGTSHVC	0	11	122	166	39
MCLMFPVYPFLIC	0	0	29	88	39
MCLMLPFFPYFIC	0	0	0	18	39
MCLMLSCLPYNIC	0	0	7	60	39
MCLMLSFLAYNIC	0	0	6	39	39
MCLTIPVFPYFIC	0	0	0	13	39
MCLVLPLFPFFMC	0	0	65	227	39
MCMNFLTCAWMARIC	0	0	2	32	39
MCPTPPC	82	65	113	153	39
MCSLLPLFPWFVC	0	0	69	162	39
MCTFGICFRSLAC	0	23	157	150	39
MCVSFYACFPILC	0	0	6	65	39
MCVSYLACFPLLC	0	0	16	53	39
MCYVWRQMLHC	0	0	59	158	39
MCFIHWDMLWHIC	0	0	5	35	38
MCFIHWDMPWPIC	0	0	4	51	38
MCIRLNLLLPYNC	0	0	16	92	38
MCLFLPVFPFYIC	0	0	3	20	38
MCLFLPVYPIFIC	0	0	0	14	38
MCLILPIFNYFIC	0	0	4	18	38
MCLILPIFPHLIC	0	0	6	31	38
MCLMLPFLPYYIC	0	0	0	20	38
MCLMLPVYPILIC	0	0	25	82	38
MCLVLLGYQPIPLHC	0	0	74	151	38
MCLVLPVFPFLPC	0	0	102	264	38
MCLYLPVFPFFHC	0	0	17	86	38
MCPILPIFPYLIC	0	0	3	34	38
MCPSLFFHPFLFC	0	17	315	303	38
MCFNHWDMLWPFC	0	0	34	75	37
MCFVFTFSRLLYC	0	0	26	81	37
MCIRLDLLLPYIC	0	0	29	73	37
MCLCLPVFPFFVC	0	0	27	111	37
MCLHLPVFPFFVC	0	0	40	129	37
MCLILPIFPYPIC	0	0	4	25	37
MCLMFQPFYLNIC	0	0	35	78	37
MCLMLSFLPDNIC	0	0	8	35	37
MCLVLPIFPYLIC	0	0	4	46	37
MCLWHKAWSYYIC	0	0	19	55	37
MCMNFLMCVWMARLC	0	0	35	59	37
MCVSFYARFPLLC	0	0	54	163	37
MRLMLSWPYSNIC	0	0	22	85	37
MCFQYFHILWRFC	0	0	10	38	36	ZMCFQYFHILWRFCGSGSDYKDDDDK	1	Crude	Mutagenesis scan
MCFRFFFSLLWPFC	0	0	0	49	36
MCFVHWDMLWPIC	0	0	3	29	36
MCIFCHSFCTVFRC	0	0	3	32	36
MCLFLPIFPYWLC	0	0	46	114	36
MCLFLPVYHFFIC	0	0	0	10	36
MCLIIPIYPWILC	0	0	31	78	36
MCLIIPVFPWFIC	0	0	0	16	36
MCLIISVFPFFVC	0	0	2	19	36
MCLIMPIFPYFVC	0	0	0	19	36
MCLITPVFPFLIC	0	0	2	20	36
MCLMLSFLPYLIC	0	0	0	20	36
MCLPWFILRSVIC	0	0	13	57	36
MCLPWLILRSVVC	0	0	68	126	36
MCMNLLTCVWMARLC	0	0	37	87	36
MCPWAFTIFRFRC	0	0	51	117	36
MCTLFPFPYSFTIC	0	0	33	105	36
MCVSFYACFPFLC	0	0	32	81	36
MCVSFYACFPWSC	0	0	11	58	36
MCYAWRQMLLC	0	0	51	129	36
MCYFMTLYLC	0	6	105	174	36
MYLMLSWPYSNIC	0	0	10	57	36
MCALFPFPHSFTIC	0	0	48	128	35
MCFIHWDMLWPNC	0	0	19	84	35
MCFIYWDMLWPIC	0	0	2	29	35
MCFSFYACFPFFVC	0	0	10	32	35
MCIRLNLLLPYSC	0	0	17	89	35
MCLFCHLLPYFTC	0	6	121	184	35
MCLFLPVFPFIVC	0	0	17	69	35
MCLFLPVFPYWTC	0	0	9	76	35
MCLIIPVFPFFIFC	0	0	7	18	35
MCLIIPVFPFLTC	0	0	10	45	35
MCLILPTFPFFVC	0	0	5	40	35
MCLLPPLFPWFVC	0	0	78	176	35
MCLMLPFMPYNIC	0	0	0	19	35
MCLMLSFWPYNIC	0	0	5	44	35
MCLMLSWPYANIC	0	0	7	62	35
MCMNFLTRVWMARLC	0	0	26	85	35
MCFIHWDMLWPHC	0	0	17	78	34
MCFIHWDMLWPRC	0	0	7	57	34
MCFTHFHVLWPVC	0	0	9	59	34
MCIPWFILKAYVC	0	11	191	155	34
MCIRLSLLLPYIC	0	0	16	85	34
MCLFLHSFSIYFC	0	9	94	152	34
MCLFLPLFPWFVC	0	0	27	70	34
MCLFMPVFPFFVC	0	0	18	63	34
MCLILPIFPYFPC	0	0	17	51	34
MCLILPIFPYLTC	0	0	9	45	34
MCLILPIFPYYVC	0	0	0	16	34
MCLILPTFPYFMC	0	0	14	58	34
MCLILPVFPFFLC	0	0	39	89	34
MCLILTYSKLLSC	0	0	23	97	34
MCLIMPIFHYFIC	0	0	2	7	34
MCLIMPIFTYFIC	0	0	4	14	34
MCLLFAFSHLLSC	0	10	121	187	34
MCLLLPLFPRFVC	0	0	63	126	34
MCLLLSWPYSNIC	0	0	14	52	34
MCLMLPIYPFFIC	0	0	6	33	34
MCLMPPWLSSHIC	0	0	27	80	34
MCLVLLGYQPILLPC	0	0	60	133	34
MCLVLPIFPLLC	0	0	10	73	34
MCLVLPTFPYFIC	0	0	3	14	34
MCLWHRAWPYYIC	0	0	43	84	34
MCLYLPVFPSFIC	0	0	13	64	34
MCMFLPFLLMPVC	0	0	10	83	34
MCPYLPVFPFFIC	0	0	6	55	34
MSFIHWDMLWPFC	0	0	35	56	34
MCC	49	37	73	151	33
MCCNCLPLSLPLIC	0	0	51	123	33
MCCNCLPPSLLLIC	0	0	63	134	33
MCFLCLPMFFLDC	0	2	52	153	33
MCFQYFHILWPNC	0	0	3	37	33
MCFSFYACFPLSC	0	0	19	81	33
MCFSFYARFPLYC	0	0	38	136	33
MCIFCHCFCSVFRC	0	0	12	42	33
MCIFCHSFCSLFRC	0	0	10	27	33
MCIFCHSICSVFRC	0	0	7	47	33
MCLFLPVFPLYC	0	0	12	50	33
MCLFLPVFPVFVC	0	0	21	62	33
MCLFLPVYPFLLC	0	0	8	60	33
MCLIFPYSRLATC	0	2	97	159	33
MCLIFTYSKLLIC	0	0	4	24	33
MCLILAPRYPNVC	0	0	67	146	33
MCLMLSFFVC	0	0	6	17	33
MCLMLSWHYSNIC	0	0	14	38	33
MCLVLPIFPVFVC	0	0	37	70	33
MCLWHRAWSYYMC	0	0	33	130	33
MCLYFSECVFVC	0	0	0	52	33
MCLYLPVYPFLIC	0	0	15	72	33
MCMNFLTCVRMARLC	0	0	21	66	33
MCSLIMLGPYPLYFC	0	15	215	218	33
MCVSFYACFPPFC	0	0	3	50	33
MCALFPFPYLFTIC	0	0	31	77	32
MCCFSFFACFLIC	0	0	11	51	32
MCCFSFYACFFPC	0	0	32	59	32
MCFLCLPMFFLIC	0	0	3	36	32
MCFRSFSLLWPFC	0	0	18	61	32
MCFSSYACFPLYC	0	0	39	98	32
MCLFCHSFCSVFRC	0	0	7	43	32
MCLFLPVYPYNIC	0	0	0	25	32
MCLHLPVFPFFIC	0	0	22	53	32
MCLIFTYPKLLSC	0	0	22	76	32
MCLILPVFPYNIC	0	0	0	27	32
MCLLFLFSQLLSC	0	3	107	134	32
MCLLLPLFPFLTC	0	0	18	75	32
MCLMLPGYPFLIC	0	0	10	39	32
MCLMLPWLSSHTC	0	0	29	107	32
MCLMLSFLPYFVC	0	0	0	17	32
MCLMLSFVPYNIC	0	0	6	46	32
MCLRHRAWSYYIC	0	0	35	120	32
MCLTIPVFPFLIC	0	0	5	33	32
MCLVFPIFPFFVC	0	0	20	62	32
MCLWHRAWSHYIC	0	0	35	72	32
MCLYLPIFPFFVC	0	0	23	73	32
MCLYLPVFPFFMC	0	0	20	106	32
MCMFLPVFPFFIC	0	0	2	13	32
MCMNFLTCVWTARLC	0	0	34	123	32
MCPIIPVFPFLIC	0	0	2	25	32
MCPMFQPFYSNIC	0	0	10	43	32
MCPSPPC	42	61	76	111	32
MCTFLLPFSLWFC	0	9	127	189	32
MCYALPFPLMLFC	0	0	28	113	32
MCYFLEPYFLYFC	0	7	98	149	32
MCYVWRQTLLC	0	0	53	104	32
MCFTHFHILWPFC	0	0	10	44	31	ZMCFTHFHILWPFCGSGSDYKDDDDK	1.0871e-07	Crude	Mutagenesis scan
MCFCLWAFHYCSC	0	8	128	169	31
MCFIHWDMLLPYNIC	0	0	0	16	31
MCFNFLLCPFSLC	0	8	61	116	31
MCINFLTCVWMARLC	0	0	26	63	31
MCLCLPVYPFFVC	0	0	5	41	31
MCLFLPVWPFAIC	0	6	62	131	31
MCLIFTYSRLLSC	0	0	22	69	31
MCLIIPVFPFFIIC	0	0	0	11	31
MCLIIPVFPFFRC	0	0	2	29	31
MCLIIPVFPFHIC	0	0	0	19	31
MCLILPIFPCFVC	0	0	0	30	31
MCLILPLFPFFVC	0	0	21	46	31
MCLLMPFPYSFIC	0	0	21	57	31
MCLMFWPKHTNIC	0	9	75	126	31
MCLMLPFLPYDIC	0	0	4	23	31
MCLMLPFLPYNNC	0	0	0	30	31
MCLVLPIFPYWLC	0	0	24	60	31
MCLVPPIFPFFIC	0	0	0	9	31
MCLYLPVFPLFLC	0	0	27	73	31
MCMNFLTCVWMAHLC	0	0	32	90	31
MCPWFFSQFAFWC	0	2	68	142	31
MCPWLFSQFAFSC	0	0	29	109	31
MCRNCLPLSLLLIC	0	0	36	103	31
MCVSYLAWFPWSC	0	0	17	79	31
MSLFLPVYPFFIC	0	0	2	12	31
MCCPLPFLLFWFC	0	8	143	159	30
MCFIHWDMLWPC	0	0	10	81	30
MCIFCHSFCSVFWC	0	0	2	43	30
MCLFLPVSPYWIC	0	0	5	15	30
MCLFMPVYPFFVC	0	0	17	59	30
MCLIIPVFPHFIC	0	0	0	9	30
MCLIIPVFPWFVC	0	0	11	31	30
MCLILPFLTYHIC	0	0	12	44	30
MCLKLPVYPFLIC	0	0	21	47	30
MCLLLSVFPFFVC	0	7	118	121	30
MCLMMPFLPYNIC	0	0	0	15	30
MCLSLPVFPYWIC	0	0	2	25	30
MCLVLLGYQPTPLPC	0	0	91	135	30
MCLYLPFLLIPFC	0	0	25	62	30
MCMMLPVYPFLIC	0	0	13	36	30
MCVMLSWPYSNIC	0	0	13	69	30
MCVSFLACIPYPC	0	3	52	120	30
MCVSYLACFPWCC	0	0	18	82	30
MCWYCYTLLWPFC	0	11	72	116	30
MYFIHWDMLWPFC	0	0	32	63	30
MCFQYFHILWAFC	0	0	3	22	29	ZMCFQYFHILWAFCGSGSDYKDDDDK	1	Crude	Mutagenesis scan
MCALFPFPYSFAIC	0	0	52	109	29
MCALFPYPYSFTIC	0	0	22	72	29
MCCFMLYPTLMFC	0	11	86	125	29
MCCNCLPLSLLLNC	0	0	31	112	29
MCFIHWDMLWTFC	0	0	28	74	29
MCFIHWDVLWPIC	0	0	5	28	29
MCFMCPLIQCLLIC	0	3	92	130	29
MCFMHFHVLWPFC	0	0	21	42	29
MCFRYFHILWPLC	0	0	4	44	29
MCFSFYACFPFFIC	0	0	7	26	29
MCFSHWDMLWPFC	0	0	18	58	29
MCFTHFHVLWPCC	0	0	20	101	29
MCIHLNLLLPYIC	0	0	9	31	29
MCIRLNLLLPYLC	0	0	10	50	29
MCLFLPVFSYWLC	0	0	31	66	29
MCLIIPVFPYFTC	0	0	0	10	29
MCLIITVFPFFVC	0	0	3	21	29
MCLILLIFPYFVC	0	0	0	13	29
MCLILPYNIC	0	0	0	11	29
MCLILSVFPYFIC	0	0	14	19	29
MCLLAFGPWTTLFTC	0	0	37	96	29
MCLLIPVYPFFIC	0	0	38	67	29
MCLLLPVFPYFIC	0	0	7	36	29
MCLMLPVFPYWLC	0	0	28	57	29
MCLMLSWTYSNIC	0	0	14	38	29
MCLQYFHILWPLC	0	0	8	40	29
MCLVLPTFPFFIC	0	0	3	20	29
MCMNFLTCVWMARVC	0	0	4	40	29
MCPWAFSIFRFWC	0	0	98	103	29
MCPWLFSQFAFLC	0	0	37	113	29
MCPWLFSQFALWC	0	0	53	84	29
MCPWLLSQFAFWC	0	0	56	105	29
MCTIFLPFFWSLC	0	12	157	165	29
MCVSFYACFPLPC	0	0	39	87	29
MCYSYMLLHALLC	0	5	112	143	29
MCFTHFHMLWPFC	0	0	28	71	28	MCFTHFHMLWPFC	6.66155e-09	Purified	Selection
MCFTHFHMLWPFC	0	0	28	71	28	MCFTHFHMLWPFCGSGSDYKDDDDK	1.23171e-07	Purified	Selection
MCFPYFHILWPFC	0	0	14	53	28	ZMCFPYFHILWPFCGSGSDYKDDDDK	1	Crude	Mutagenesis scan
MCFTHFHMLWPFC	0	0	28	71	28	ZMCFTHFHMLWPFCGSGSDYKDDDDK	3.48916e-08	Crude	Mutagenesis scan
MCFTHFHMLWPFC	0	0	28	71	28	ZMCFTHFHMLWPFCGSGSDYKDDDDK	6.68698e-08	Purified	Selection
MCFIHWDILWPIC	0	0	3	38	28
MCFIHWNMLWPIC	0	0	4	32	28
MCFPFYACFPLYC	0	0	35	96	28
MCFQNYLMYLIGC	0	0	38	75	28
MCFVLPVFPFLIC	0	0	32	75	28
MCIALLGGQTLVWIC	0	0	29	81	28
MCLFLPVFPYWSC	0	0	6	41	28
MCLFLPVNPFFIC	0	0	0	25	28
MCLFLSVFPYWLC	0	0	17	69	28
MCLFMPVYPFFIC	0	0	0	13	28
MCLIFTYSKPLSC	0	0	20	62	28
MCLIIPMFPFFVC	0	0	0	20	28
MCLIIPVFPFFC	0	0	9	66	28
MCLIIPVFPFPIC	0	0	3	23	28
MCLIIPVFPYFMC	0	0	0	13	28
MCLILPIFPYFIIC	0	0	0	11	28
MCLIVPIFPWILC	0	0	40	87	28
MCLIVPVFPYFIC	0	0	0	8	28
MCLMFQPFYSNSC	0	0	14	57	28
MCLMLPWPSSHIC	0	0	43	75	28
MCLMLYWPYSNIC	0	0	13	40	28
MCLSFMSCFPFVC	0	25	94	142	28
MCLTFQPFYSNIC	0	0	15	61	28
MCLTLPTFPYFIC	0	0	5	20	28
MCLVLPIFPFYVC	0	0	38	61	28
MCMLWFTIPFMDC	0	4	73	115	28
MCPVLPIFPFFIC	0	0	2	11	28
MCVSFHACFPLLC	0	0	15	100	28
MFFQYFHILWPFC	0	0	11	28	28
MCCNCLPLSLLLLC	0	0	29	78	27
MCFIHWDMIWPFC	0	0	27	53	27
MCFIHWDMLWPFCGC	0	0	23	80	27
MCFIIPVFPYFIC	0	0	0	8	27
MCHVLPIFPFFVC	0	0	28	89	27
MCIFCNSFCSVFRC	0	0	7	33	27
MCILLPLFPYFVC	0	0	28	65	27
MCLFLPAFPYWIC	0	0	8	24	27
MCLFLPVFPLLC	0	0	6	54	27
MCLFLPVYPFFFIC	0	0	0	14	27
MCLFPPVFPYWIC	0	0	3	33	27
MCLIIPVFPFLFC	0	0	5	27	27
MCLILPIFPYFDC	0	0	2	25	27
MCLILPIFPYFRC	0	0	3	28	27
MCLILPIFPYWIC	0	0	0	11	27
MCLILPISPYLIC	0	0	8	43	27
MCLIQPIFPYFVC	0	0	2	18	27
MCLLLPLLPWFIC	0	0	4	27	27
MCLLLPLSPWFIC	0	0	2	18	27
MCLMLSCPYSNIC	0	0	11	59	27
MCLMLSFWPFC	0	0	11	7	27
MCLVLFGYQPIPLPC	0	0	24	67	27
MCLVLLGYQPIPPPC	0	0	66	177	27
MCLVLLIFPFFVC	0	0	13	61	27
MCLVLPIFPLFIC	0	0	0	14	27
MCLVLPLFPYFVC	0	0	9	29	27
MCPWAFTIFRFLC	0	0	34	66	27
MCPWAFTIFRLWC	0	0	40	70	27
MCRFLPFLLQPSC	0	0	14	56	27
MCVFLPVYPFFVC	0	0	7	45	27
MCYVRRQMLLC	0	0	53	128	27
MCFEYFHILWPFC	0	0	8	14	26	ZMCFEYFHILWPFCGSGSDYKDDDDK	2.46281e-08	Crude	Mutagenesis scan
MCFQYFHIRWPFC	0	0	12	42	26	ZMCFQYFHIRWPFCGSGSDYKDDDDK	1	Crude	Mutagenesis scan
MCFIHFPFLWPFC	0	0	31	70	26
MCFILSVFPYLIC	0	5	93	87	26
MCFSFHACFPLYC	0	0	22	57	26
MCFTHSHVLWPFC	0	0	25	103	26
MCILLPLFPYFIC	0	0	0	10	26
MCLFLPVFLFFIC	0	0	2	14	26
MCLFLSVFPFFIC	0	0	2	13	26
MCLIIPAFPFLIC	0	0	3	26	26
MCLIIPVFPYFLC	0	0	4	18	26
MCLIIPVSPFLIC	0	0	4	31	26
MCLLLPLFPFLMC	0	0	36	114	26
MCLMLPVNPFLIC	0	2	18	99	26
MCLMLPVYTFLIC	0	0	15	53	26
MCLMLPWLSSNIC	0	0	8	51	26
MCLMLSWPYSNICGC	0	0	7	63	26
MCLMRSWPYSNIC	0	0	10	31	26
MCLSFYACFPLLQC	0	2	72	80	26
MCLTFTYSKLLSC	0	0	21	50	26
MCLVLLGYQPIPLSC	0	0	50	87	26
MCLVLPILPYFIC	0	0	4	28	26
MCLYSPVFPFFLC	0	0	11	45	26
MCMNFLACVWMARLC	0	0	18	52	26
MCPCSFFPIWIIC	0	0	3	48	26
MCPWAFTILRFWC	0	0	46	88	26
MCPWLFSQSAFWC	0	0	28	52	26
MCSFLFEFSMYFC	2	4	73	124	26
MCSYMLLPLFFIC	0	0	11	52	26
MCVGYLACFPWSC	0	0	32	77	26
MCVSYLACFPFFIC	0	0	3	25	26
MWLMLSFLPYNIC	0	0	6	14	26
MYLFLPVYPFFIC	0	0	0	11	26
MCFQYFDILWPFC	0	0	3	22	25	ZMCFQYFDILWPFCGSGSDYKDDDDK	1.50095e-08	Crude	Mutagenesis scan
MCFQYFHILWPHC	0	0	5	46	25	ZMCFQYFHILWPHCGSGSDYKDDDDK	1	Crude	Mutagenesis scan
MCALFPFPYSFMIC	0	0	29	57	25
MCCIHWDMLWPFC	0	0	10	36	25
MCCNCPPLSLLLIC	0	0	56	103	25
MCFIHWDRLWPFC	0	0	12	41	25
MCFQYFHILWPFFIC	0	0	0	11	25
MCFQYFRILWPLC	0	0	0	33	25
MCFQYLHILWPLC	0	0	4	39	25
MCFTYFHVLWPFC	0	0	18	41	25
MCLFLHVYPFFVC	0	0	13	46	25
MCLFLLVFPYWLC	0	0	15	78	25
MCLFLPVFPFFFC	0	0	23	60	25
MCLIFTYSKLLYC	0	0	8	46	25
MCLMLPWPYPNIC	0	0	3	32	25
MCLMLSLPYSNIC	0	0	22	61	25
MCLVLPLFPFFSC	0	0	28	90	25
MCLYLPVFPYFLC	0	0	25	53	25
MCMMLPFLPYNIC	0	0	0	10	25
MCMNFPTCVWMARLC	0	0	30	78	25
MCMTLPVFPFIIC	0	9	90	115	25
MCMWFPYGRAPTWIC	0	7	151	161	25
MCPWAFTIFRFSC	0	0	23	78	25
MCVSFYACFPFFIC	0	0	6	21	25
MCWDCLFCMLNDC	0	11	105	133	25
MCFTHFHALWPFC	0	0	26	85	24	ZMCFTHFHALWPFCGSGSDYKDDDDK	6.43232e-07	Crude	Mutagenesis scan
MCCFSFYFCPIVC	0	0	9	57	24
MCFFLPVYPFFVC	0	0	5	31	24
MCFHYFALLWPFC	0	0	29	64	24
MCFIHFSFLWPSC	0	0	12	54	24
MCFIHWDMLIPFC	0	0	11	29	24
MCFIHWDMLRPLC	0	0	11	56	24
MCFLLFWPYSFYC	0	6	95	93	24
MCFQHFHILWPLC	0	0	3	36	24
MCFQYFPYFIC	0	0	0	8	24
MCFRFFSPLWPFC	0	0	25	59	24
MCFRLFSLLWPFC	0	0	21	70	24
MCFSYFSLLWPFC	0	0	29	63	24
MCFTHWDMLWPVC	0	0	5	57	24
MCHLLFFPCLWFC	0	12	132	124	24
MCIFCHSFCSGFRC	0	0	8	23	24
MCIMLSWPYSNIC	0	0	11	31	24
MCLFFPVFPYWLC	0	0	19	44	24
MCLFLPNWHLYAC	0	0	35	62	24
MCLFLPVFQFFVC	0	0	20	40	24
MCLFLPVYPCFVC	0	0	3	28	24
MCLFLPVYPFFPC	0	0	10	76	24
MCLFLPVYPFIIC	0	0	2	16	24
MCLIIPVFPFFFFC	0	0	0	8	24
MCLIIPVFPFSTC	0	0	6	35	24
MCLIIPVFPWSC	0	0	7	22	24
MCLILPIFPYFICSC	0	0	3	35	24
MCLILPVFPYFSC	0	0	7	33	24
MCLLLPLFPWYVC	0	0	25	52	24
MCLLLPLLPFLIC	0	0	28	56	24
MCLMFQPFYSSIC	0	0	18	51	24
MCLMFRPFYSNIC	0	0	27	71	24
MCLMLPWPYSNVC	0	0	5	32	24
MCLPWFILRSVLC	0	0	35	120	24
MCLVIPVFPFLIC	0	0	2	11	24
MCLYFSECVFPYFIC	0	0	0	10	24
MCLYLPVFLFFVC	0	0	23	62	24
MCLYLPVFPFFDC	0	0	20	79	24
MCLYLPVFPFSLC	0	0	26	77	24
MCLYLPVFPSFLC	0	0	23	58	24
MCMNFLTCVWIARLC	0	0	21	41	24
MCMNFLTCVWVARLC	0	0	41	66	24
MCPLPPC	49	43	90	84	24
MCPRLFSQFAFWC	0	0	56	74	24
MCSQYFHILWPLC	0	0	3	51	24
MGLMLSFLPYNIC	0	0	6	22	24
MRLILPIFPYFVC	0	0	0	13	24
MRLMLPVYPFLIC	0	0	25	51	24
MCALFPFPCSFTIC	0	0	23	68	23
MCALFPFPYTFTIC	0	0	24	57	23
MCCFSFYYCLIPC	0	0	53	68	23
MCCFSFYYCLISC	0	13	131	184	23
MCCFYFPFSLFVC	0	4	76	89	23
MCCNCLPLSLLWIC	0	0	17	32	23
MCFLAFHYLWPVC	0	0	11	49	23
MCFLCLLPLLYSC	0	12	85	124	23
MCFQYFHTLWPLC	0	0	4	40	23
MCFSVYSFVSGLC	0	11	91	111	23
MCFTHFRVLWPFC	0	0	25	56	23
MCFVFTFSRLLPC	0	0	17	67	23
MCFVSFSVLWPLC	0	0	11	52	23
MCIFCHSFCSVVRC	0	0	6	31	23
MCLFIPVYPFLIC	0	0	16	70	23
MCLFLAVYPFFVC	0	0	6	21	23
MCLFLPVFPYLLC	0	0	26	42	23
MCLFRPVYPFFVC	0	0	8	44	23
MCLIIPVFPC	0	0	3	61	23
MCLIIPVFPFFDC	0	0	5	29	23
MCLIIPVFPSLIC	0	0	3	28	23
MCLILPIFPYYLC	0	0	6	32	23
MCLILPLFPFLAC	0	0	28	97	23
MCLILPTFPYYIC	0	0	0	19	23
MCLILPTSPYFIC	0	0	3	25	23
MCLILPVFPCFIC	0	0	5	27	23
MCLIPPIFPYFTC	0	0	0	18	23
MCLLLPLFPWFDC	0	0	20	91	23
MCLLLPPFPWFIC	0	0	0	24	23
MCLMFQPSYSNIC	0	0	15	83	23
MCLMIPVYPFLIC	0	0	10	36	23
MCLMISWPYSNIC	0	0	8	31	23
MCLMLPDYPFLIC	0	0	15	57	23
MCLMLPFLPYNSC	0	0	0	25	23
MCLMLPVYPFLICGC	0	0	9	76	23
MCLMLPWLPSHIC	0	0	43	61	23
MCLMLPWLSSHNC	0	0	13	52	23
MCLPWFIPRSVVC	0	0	52	106	23
MCLVLPIFPFIVC	0	0	17	52	23
MCLVLPIFPYFMC	0	0	2	27	23
MCLVLPIFSFFVC	0	0	13	47	23
MCLVLPILPFFIC	0	0	0	11	23
MCLVLPLFPFFLC	0	0	36	159	23
MCLVLPVYPFLLC	0	0	73	104	23
MCMFLPFLLMPSC	0	0	22	59	23
MCPILPTFPYFIC	0	0	2	20	23
MCSPPLPC	10	34	59	109	23
MCSPWFILRSVVC	0	0	56	97	23
MCVMLPVYPFLIC	0	0	24	50	23
MCVSYLACFPWVC	0	0	2	23	23
MCYVWWQMLLC	0	0	22	52	23
MRLFLPVFPFFVC	0	0	19	41	23
MCFCLWAFHYCAC	0	0	21	56	22
MCFIHRDMLWPLC	0	0	6	32	22
MCFIHWDMPWPLC	0	0	4	44	22
MCFQNFFFVC	0	0	7	54	22
MCFQYFHIPWPLC	0	0	5	35	22
MCFTHFHVLRPFC	0	0	38	97	22
MCIFCHSFFSVFRC	0	0	9	25	22
MCIFCHTFCSVFRC	0	0	7	17	22
MCLFLPVFPFFSC	0	0	2	31	22
MCLFLPVFPFLLC	0	0	8	47	22
MCLFLPVFPHWIC	0	0	14	24	22
MCLFLPVFPWFIC	0	0	2	14	22
MCLFLPVYPYWLC	0	0	27	72	22
MCLIIPVFPFFKC	0	0	4	21	22
MCLIIPVFPFNIC	0	0	2	22	22
MCLILPFLTSHIC	0	0	36	85	22
MCLILPIFPIFIC	0	0	2	14	22
MCLILPIFPNLIC	0	0	0	13	22
MCLILPIFPYFFIC	0	0	0	10	22
MCLILPIFPYFICDC	0	0	0	24	22
MCLIPAPQYPNVC	0	0	27	81	22
MCLIPPTFPYFIC	0	0	0	26	22
MCLLLPPGWGNVC	0	13	178	222	22
MCLMLPFLPYNFC	0	0	0	13	22
MCLMLPWLSPHIC	0	0	23	54	22
MCLMLSFLPFFIC	0	0	0	18	22
MCLMLSWPNSNIC	0	0	15	83	22
MCLMLTVYPFLIC	0	0	10	27	22
MCLNFLTCVWMARLC	0	0	12	50	22
MCLPWFILRPVVC	0	0	38	87	22
MCLSFYACFPLLPC	0	2	56	75	22
MCLVIPLFPFFIC	0	0	25	58	22
MCLVLPIFPFFFVC	0	0	0	12	22
MCLVLPLFSFFIC	0	0	15	23	22
MCLVLPVFPYWLC	0	0	29	64	22
MCLVLPVSPFLLC	0	0	40	84	22
MCLWHRARSYYIC	0	0	23	74	22
MCPFHFCFILYAC	0	0	19	39	22
MCPWAFTTFRFWC	0	0	74	110	22
MCPWASTIFRFWC	0	0	37	74	22
MCPWLFSQFAFVC	0	0	11	67	22
MCQFLPVFPYWLC	0	0	38	79	22
MCSILAPQYPNVC	0	0	25	88	22
MCVSFYACFPHLC	0	0	17	33	22
MCVSFYAWFPLLC	0	0	18	38	22
MCALFPFPYSFTLC	0	0	21	40	21
MCFHLPYLLIPIC	0	0	5	27	21
MCFIHWGMLWPIC	0	0	0	23	21
MCFLCLSMYIC	0	0	5	31	21
MCFSFIACFPLWC	0	2	50	84	21
MCFVWPWWLC	0	8	85	134	21
MCIFCHILWPFC	0	0	3	12	21
MCLELPIFPFFVC	0	0	13	63	21
MCLFLLVFPFFIC	0	0	0	13	21
MCLFLPVFPWSC	0	0	7	30	21
MCLFLPVLPYWIC	0	0	6	38	21
MCLIINVFPFFIC	0	0	6	8	21
MCLIIPVFPFLLLC	0	0	0	9	21
MCLIIPVFPFLSC	0	0	4	23	21
MCLIIPVFPFSLC	0	0	0	13	21
MCLIITVFPYFIC	0	0	0	8	21
MCLILAPQYPSVC	0	0	16	46	21
MCLILPIFPYLFC	0	0	2	26	21
MCLILPLFPFLGC	0	0	33	63	21
MCLILPLYQLLLC	0	7	209	183	21
MCLILPTFPHFIC	0	0	3	16	21
MCLILPVFPYFFC	0	0	3	25	21
MCLILPVFPYFNC	0	0	0	26	21
MCLIQPVFPYFIC	0	0	4	16	21
MCLLCSLLPYFIC	0	0	11	51	21
MCLLLPLFPWSIC	0	0	0	21	21
MCLLLPLFPYLIC	0	0	9	40	21
MCLPRFILRSVVC	0	0	45	80	21
MCLPWFTLRSVVC	0	0	53	115	21
MCLPWSILRSVVC	0	2	60	101	21
MCLVFPLFPFFIC	0	0	14	24	21
MCLVLPTFPFFLC	0	0	83	88	21
MCLVLPVFPFLRC	0	0	28	85	21
MCLYLPAFPFFLC	0	0	33	75	21
MCPLLPLFPFLIC	0	0	22	52	21
MCPWAFTIFRSWC	0	0	39	68	21
MCPWLSSQFAFWC	0	0	51	88	21
MCPWPFSQFAFWC	0	0	45	73	21
MCRMLSWPYSNIC	0	0	7	25	21
MCSYLPVFPFFIC	0	0	15	39	21
MCVSFLACFPYLC	0	0	8	32	21
MCVSYLACFPFFVC	0	0	7	31	21
MYLMLPVYPFLIC	0	0	16	45	21
MCCFSFFACFRFC	0	9	99	94	20
MCCFSFYACFLSC	0	0	39	64	20
MCCNCLPLSLLSIC	0	0	40	89	20
MCCQYFHILWPFC	0	0	6	31	20
MCCVWRQMLLC	0	0	17	58	20
MCFIHWDTLWPLC	0	0	11	39	20
MCFQYFHILWLLC	0	0	4	30	20
MCFRFFSLLWPIC	0	0	9	63	20
MCFRFFSLLWPYC	0	0	11	70	20
MCFRFFTLLWPFC	0	0	21	39	20
MCFTHWDMLWPSC	0	0	14	40	20
MCHRSVRFITFMFC	0	5	56	100	20
MCIALLGGQTLIWNC	0	0	10	37	20
MCICLNLLLPYIC	0	0	10	29	20
MCIFCHSFCSVLLC	0	0	3	31	20
MCLFLPVFPFWLC	0	0	45	64	20
MCLFLPVFPNWLC	0	0	27	64	20
MCLFLPVFSFFVC	0	0	22	59	20
MCLFLPVYPFVVC	0	0	12	37	20
MCLFLPVYPYLIC	0	0	0	5	20
MCLIHWDMLWPVC	0	0	0	26	20
MCLIIIPVFPFFIC	0	0	0	3	20
MCLIILVFPFFVC	0	0	0	13	20
MCLIIPVFPFFICSC	0	0	2	18	20
MCLIIPVFPFIVC	0	0	0	10	20
MCLILPIFPYFKC	0	0	4	47	20
MCLILPIFPYLLC	0	0	9	31	20
MCLILPIYPYLIC	0	0	0	14	20
MCLILPTFPYLLC	0	0	33	44	20
MCLILSIFPYFVC	0	0	0	12	20
MCLITPVFPLFIC	0	0	0	16	20
MCLLLPIFPFFVC	0	0	15	54	20
MCLLLPLFPYFPC	0	0	24	57	20
MCLMFQPFYPNVC	0	0	2	10	20
MCLMFYSITMLC	0	7	52	69	20
MCLMLPFLLYNIC	0	0	0	13	20
MCLMLPRLSSHIC	0	0	17	53	20
MCLMLSFLPYNKC	0	0	9	58	20
MCLMLSWPFSNIC	0	0	14	40	20
MCLNLPIFPYFVC	0	0	0	7	20
MCLVLPIFPFLLC	0	0	29	97	20
MCLVLPIFPYFTC	0	0	4	17	20
MCLVLPVLPFLLC	0	0	36	85	20
MCLVLSIFPFFVC	0	0	20	74	20
MCLVLSVFPFLIC	0	0	52	57	20
MCLVPPIFPYFIC	0	0	3	12	20
MCLWHRAWSYHIC	0	0	22	46	20
MCLYFSECVFC	0	0	0	23	20
MCLYLPVFPLLC	0	0	4	32	20
MCPPSPC	65	72	116	127	20
MCPWLFSQFAFC	0	0	13	44	20
MCPWLFSQLAFWC	0	0	38	76	20
MCSWHRAWSYYIC	0	0	29	59	20
MCVGFYACFPLLC	0	0	26	66	20
MCVSYLACFPYFIC	0	0	2	22	20
MSLMLPVYPFLIC	0	0	17	47	20
MCALYPFPYSFTIC	0	0	14	46	19
MCCFSFYACFVPC	0	0	29	77	19
MCCFSYLFCFSC	0	11	53	69	19
MCCNRLPLSLLLIC	0	0	48	95	19
MCCWSFYACFLTC	0	0	44	59	19
MCFFHPYSFVVIC	0	0	7	28	19
MCFIHWDILWPLC	0	0	6	31	19
MCFIHWDMLWPWC	0	0	4	40	19
MCFILPIFPYLIC	0	0	5	22	19
MCFLCLPMLFLGC	0	0	17	31	19
MCFQNLLIYLLPWC	0	6	98	100	19
MCFVFTFPRLLSC	0	0	6	28	19
MCLFLPNWHLYFC	0	0	17	67	19
MCLFLPVIPFFVC	0	0	16	48	19
MCLFLPVYPFCVC	0	0	8	31	19
MCLFLPVYPYWIC	0	0	0	5	19
MCLIFQPVYPNVC	0	0	4	21	19
MCLIFTYSKLLTC	0	0	8	53	19
MCLIIPVFLYFIC	0	0	0	6	19
MCLIIPVFPFTIC	0	0	7	20	19
MCLIIPVFPFYVC	0	0	2	17	19
MCLIIPVFPLFC	0	0	0	19	19
MCLIIPVVPFFVC	0	0	0	14	19
MCLIISIFPWILC	0	0	19	36	19
MCLILAPQHPNVC	0	0	20	45	19
MCLILHIFTYFIC	0	0	4	5	19
MCLILPIFPLFIC	0	0	0	5	19
MCLILPIFPYLNC	0	0	2	16	19
MCLILPIFPYLSC	0	0	5	18	19
MCLILPVFPFLPC	0	0	18	53	19
MCLILPVFPFLVC	0	0	15	33	19
MCLILPVFPYWIC	0	0	0	12	19
MCLIMPVFPYFIC	0	0	2	11	19
MCLIPPISPYFIC	0	0	3	15	19
MCLLLPLFPLLIC	0	0	32	65	19
MCLLLPLSPFLIC	0	0	15	38	19
MCLMLPVYPLFIC	0	0	2	17	19
MCLMSQPFYSNIC	0	0	24	58	19
MCLRLNLLLPYIC	0	0	7	24	19
MCLSFYACFPLLC	0	0	9	32	19
MCLVIPVYPFFIC	0	0	8	24	19
MCLVLPLFPFLVC	0	0	26	51	19
MCLWHRTWSYYIC	0	0	10	51	19
MCLWHRVWSYYIC	0	0	17	28	19
MCLYFSECVFAC	0	0	0	19	19
MCMDFLTCVWMARLC	0	0	17	44	19
MCMNFLTCVWMACLC	0	0	5	28	19
MCNFCHSFCSVFRC	0	0	12	28	19
MCPIFTYSKLLSC	0	0	11	63	19
MCPTLPIFPYFIC	0	0	3	13	19
MCQCLPFLLIPFC	0	0	24	80	19
MCQYLPFLFIPFC	0	0	14	38	19
MCQYLPFLHIPFC	0	0	7	30	19
MCQYLPFLLIHFC	0	0	16	44	19
MCQYMPFLLIPFC	0	0	15	30	19
MCSFCHSFCSVFRC	0	0	8	23	19
MCSMLPWLSSHIC	0	0	23	48	19
MCVFLPLWPLFFC	0	10	55	66	19
MCVSFYACFLLLC	0	0	14	66	19
MCVSYLACFPWFIC	0	0	0	7	19
MRLVLPIFPFFVC	0	0	15	30	19
MCFQYFHILGPFC	0	0	10	38	18	ZMCFQYFHILGPFCGSGSDYKDDDDK	1	Crude	Mutagenesis scan
MCFQYVHILWPFC	0	0	7	32	18	ZMCFQYVHILWPFCGSGSDYKDDDDK	1	Crude	Mutagenesis scan
MCALFPIPYSFTIC	0	0	12	29	18
MCFIHGDMLWPFC	0	0	11	41	18
MCFIPWDMLWPFC	0	0	2	25	18
MCFMCLPMFYYLC	0	0	19	39	18
MCFPCLPMFFLGC	0	0	29	36	18
MCFQYFHILC	0	0	4	7	18
MCFQYFHILRPLC	0	0	3	38	18
MCFQYSHILWPLC	0	0	2	24	18
MCFSFCACFPLYC	0	0	15	39	18
MCFSFYACFPLDC	0	0	15	56	18
MCFVLPLFPFFIC	0	0	16	64	18
MCIFCHSCCSVFRC	0	0	4	22	18
MCLALLGYQPIPLPC	0	0	85	156	18
MCLALPIFPYFIC	0	0	5	17	18
MCLFLPDYPFFIC	0	0	0	16	18
MCLFLPVFPYFMC	0	0	4	23	18
MCLFLPVFPYRIC	0	0	2	38	18
MCLIFACSRLASC	0	4	31	52	18
MCLIIPFFPFFIC	0	0	2	8	18
MCLIIPFFPYFIC	0	0	0	6	18
MCLIIPVYPLFIC	0	0	0	5	18
MCLIITVFTFFIC	0	0	0	6	18
MCLILPFLTFLIC	0	0	3	30	18
MCLILPIFPFFAC	0	0	0	17	18
MCLILPIFPWIFC	0	0	2	17	18
MCLILPLFPWFVC	0	0	15	25	18
MCLILPTFPFFPC	0	0	18	57	18
MCLILPTFPYSIC	0	0	0	23	18
MCLILPVFSYFIC	0	0	3	9	18
MCLILSVFPYLIC	0	0	22	51	18
MCLILTIFTYFIC	0	0	0	5	18
MCLLLPLFPWFMC	0	0	4	44	18
MCLLLPLFPWFRC	0	0	6	26	18
MCLMLPVFPYFIC	0	0	2	15	18
MCLMLSFLPYNAC	0	0	0	31	18
MCLMLSFLPYNIIC	0	0	0	2	18
MCLMLSWPYPNVC	0	0	3	38	18
MCLPWFILRSVEC	0	0	42	65	18
MCLTLAPQYPNVC	0	0	50	92	18
MCLTLPIFPHFIC	0	0	0	16	18
MCLTLPISPYFIC	0	0	3	20	18
MCLTPPIFPYFIC	0	0	0	12	18
MCLVLPIIPFFVC	0	0	24	49	18
MCLYLPVFPWFVC	0	0	14	46	18
MCMNFLTCIWMARLC	0	0	11	28	18
MCMNSLTCVWMARLC	0	0	31	84	18
MCMSFLTCVWMARLC	0	0	11	44	18
MCPILPILPYFIC	0	0	3	12	18
MCPVLPIFPYFIC	0	0	5	13	18
MCPWLFSQFAFIC	0	0	2	20	18
MCPWLFSQFASWC	0	0	37	88	18
MCPWLFSRFAFWC	0	0	60	103	18
MCQYLPFLLITFC	0	0	16	59	18
MCRSIYHFAFLIC	0	9	38	63	18
MCSTHFHVLWPFC	0	0	29	68	18
MCTIYFPWLWTIC	0	0	10	47	18
MCVIHWDMLWPFC	0	0	17	49	18
MCVNFLTCVWMARIC	0	0	0	26	18
MCVSFYACFPLCC	0	0	14	46	18
MCVSYLACFLWSC	0	0	25	61	18
MCVSYLACFPRFC	0	0	5	25	18
MCVSYLACSPWFC	0	0	4	18	18
MCYGYLPVFPWILC	0	2	15	71	18
MCYVWRQVLLC	0	0	27	63	18
MCYVWRRMLIC	0	0	0	26	18
MCFIHWYMLWPFC	0	0	15	38	17
MCFIRWDMLWPIC	0	0	4	21	17
MCFSGFDLLWLFC	0	8	67	65	17
MCFSNYLAFLFSC	0	0	22	43	17
MCFTHFHVPWPFC	0	0	17	67	17
MCHIIPVFPFFVC	0	0	0	21	17
MCHILPIFPYFVC	0	0	0	17	17
MCLFCHLLPYFIC	0	0	10	24	17
MCLFLHVYPFFIC	0	0	0	3	17
MCLFLLVFPFFVC	0	0	20	66	17
MCLFLPVFPYWLCGC	0	0	8	53	17
MCLFLPVFPYWNC	0	0	6	52	17
MCLFLPVFPYYIC	0	0	3	18	17
MCLFLPVYPFFEC	0	0	7	25	17
MCLIIPIFLWILC	0	0	5	25	17
MCLIIPIFPWTFC	0	0	2	20	17
MCLIIPMFPYFIC	0	0	0	3	17
MCLIIPVFPVFVC	0	0	0	10	17
MCLIIPVFPYSIC	0	0	0	6	17
MCLILHIFHYFIC	0	0	5	7	17
MCLILPIFPYFIFIC	0	0	0	10	17
MCLILPIIPYLIC	0	0	0	8	17
MCLILTIFHYFIC	0	0	0	2	17
MCLLLPLFPWYIC	0	0	3	16	17
MCLMLPFPYYNIC	0	0	10	29	17
MCLMLPVYPVLIC	0	0	11	30	17
MCLMLPWLSTHIC	0	0	9	34	17
MCLMLPYLPYNIC	0	0	0	6	17
MCLSFLACFPNIC	0	0	8	39	17
MCLTLPIFPYFMC	0	0	2	28	17
MCLTLPIFPYFTC	0	0	8	34	17
MCLTTPVFPFFIC	0	0	5	12	17
MCLVFTYSKLLSC	0	0	20	69	17
MCLVLPIFPFFTC	0	0	3	24	17
MCLVLPIFPHFIC	0	0	2	9	17
MCLVLPLFPFFNC	0	0	18	40	17
MCLWRRAWSYYIC	0	0	26	43	17
MCLYLPVFPFFFC	0	0	24	77	17
MCLYLPVLPFFLC	0	0	39	81	17
MCMIIPIFPWILC	0	0	8	46	17
MCMSFYACFLSPC	0	0	24	38	17
MCPFLPVFPYWIC	0	0	6	31	17
MCPTSPC	21	20	24	47	17
MCPWAFTIFHFWC	0	0	29	37	17
MCPWAFTIFPYFIC	0	0	0	19	17
MCPWLFPQFAFWC	0	0	41	68	17
MCPWLFSQFDFWC	0	0	28	37	17
MCQLFFYPAFWIC	0	0	15	44	17
MCSIFLPYFLSLC	0	12	106	83	17
MCTPPPC	37	34	65	97	17
MCVNFYACFPLLC	0	0	14	33	17
MCVSCLACFPWSC	0	0	26	46	17
MCVSFYACFPYFIC	0	0	0	17	17
MCWFLPVYPFFVC	0	0	10	36	17
MCYALPFPLMLVC	0	0	7	26	17
MRLIIPVFPFFVC	0	0	0	14	17
MCAFYFPFSLYIC	0	0	4	18	16
MCASYLACFPWFC	0	0	2	22	16
MCCNCLPLSLLWLC	0	0	9	24	16
MCFFLPVYPFFIC	0	0	0	7	16
MCFIHWDVLWPLC	0	0	4	31	16
MCFMCLPALFLFC	0	2	37	56	16
MCFSFYACFPYWLC	0	0	8	23	16
MCFYCLLPIFYLC	0	5	45	63	16
MCFYCLRALFFNC	0	4	50	61	16
MCHFLPFLLVPIC	0	0	9	49	16
MCIFCHSFCSVFFC	0	0	0	10	16
MCIFCHSFCSVLPC	0	0	3	31	16
MCIRLNLLLPYFC	0	0	6	48	16
MCLFLPDFPFFVC	0	0	5	11	16
MCLFLPGYPFFIC	0	0	0	13	16
[truncated: 2,220 more rows]
