# Supplementary material for: An integrated platform approach enables discovery of potent, selective and ligand-competitive cyclic peptides targeting the GIP receptor
Source: Royal Society of Chemistry journal article supplement (doi:10.1039/d1sc06844j), 2022-01-01
Supplement: d1sc06844j3.xlsx [file d1sc06844j3.xlsx]

## Sheet: Sheet1
Sequence	Calculated Mass	Found Mass	Purity in %	Conc. (uM)
ZACFTHFHMLWPFCGSGSDYKDDDDK	988.417	988.598	90.9	21.3379
ZMCFTHFHALWPFCGSGSDYKDDDDK	988.417	988.531	75.47	40.516
ZMCFTHFHRLWPFCGSGSDYKDDDDK	1016.79	1016.75	76.39	27.248
ZMCFTHFHDLWPFCGSGSDYKDDDDK	1003.09	1003.31	77.15	38.2377
ZMCFTHFHQLWPFCGSGSDYKDDDDK	1007.43	1007.57	82.07	40.5415
ZMCFTHFHELWPFCGSGSDYKDDDDK	1007.76	1007.83	75.91	41.8918
ZMCFTHFHGLWPFCGSGSDYKDDDDK	983.74	983.872	80.14	18.4461
ZMCFTHFHHLWPFCGSGSDYKDDDDK	1010.44	1010.5	82.7	24.4012
ZMCFTHFHILWPFCGSGSDYKDDDDK	1002.44	1002.51	61.36	25.5788
ZMCFTHFHLLWPFCGSGSDYKDDDDK	1002.44	1002.44	84.18	13.9183
ZMCFTHFHKLWPFCGSGSDYKDDDDK	1007.45	1007.5	78.488	23.6076
ZMCFTHFHFLWPFCGSGSDYKDDDDK	1013.78	1014.29	47.14	31.8891
ZMCFTHFHPLWPFCGSGSDYKDDDDK	997.097	997.251	75.19	34.7358
ZMCFTHFHSLWPFCGSGSDYKDDDDK	993.75	993.856	71.71	44.9767
ZMCFTHFHTLWPFCGSGSDYKDDDDK	998.423	998.515	67.75	29.6112
ZMCFTHFHWLWPFCGSGSDYKDDDDK	1026.79	1026.87	62.75	18.217
ZMCFTHFHYLWPFCGSGSDYKDDDDK	1019.11	1019.55	63.4	47.3186
ZMCFTHFHVLWPFCGSGSDYKDDDDK	997.767	997.983	36.28	30.7064
ZMCFTHFHMAWPFCGSGSDYKDDDDK	994.43	994.389	21.77	19.7239
ZMCFTHFHMRWPFCGSGSDYKDDDDK	1022.8	1023.41	14.09	17.7968
ZMCFTHFHMDWPFCGSGSDYKDDDDK	1009.1	1009.23	87.599	20.978
ZMCFTHFHMQWPFCGSGSDYKDDDDK	1013.45	1013.16	72.08	11.8589
ZMCFTHFHMEWPFCGSGSDYKDDDDK	1013.77	1013.82	73.29	24.7033
ZMCFTHFHMGWPFCGSGSDYKDDDDK	989.753	990.195	36.24	26.316
ZMCFTHFHMHWPFCGSGSDYKDDDDK	1016.45	1016.42	12.9	12.8035
ZMCFTHFHMIWPFCGSGSDYKDDDDK	1008.46	1008.57	34.9	11.3351
ZMCFTHFHMKWPFCGSGSDYKDDDDK	1013.46	1014.22	14.8	23.6389
ZMCFTHFHMFWPFCGSGSDYKDDDDK	1019.8	511.489	0	0
ZMCFTHFHMPWPFCGSGSDYKDDDDK	1003.11	1003.91	46.11	41.4846
ZMCFTHFHMSWPFCGSGSDYKDDDDK	999.763	1000.18	19.93	15.6029
ZMCFTHFHMTWPFCGSGSDYKDDDDK	1004.44	1004.91	21.22	16.2751
ZMCFTHFHMWWPFCGSGSDYKDDDDK	1032.81	1033.39	73.1	15.184
ZMCFTHFHMYWPFCGSGSDYKDDDDK	1025.13	1025.27	87.01	9.44894
ZMCFTHFHMVWPFCGSGSDYKDDDDK	1003.78	1003.64	32.13	6.18134
ZMCFTHFHMLWPFCGSGSDYKDDDDK	1008.46	1008.57	8.35	13.0979
ZMCFTHFHMLAPFCGSGSDYKDDDDK	970.08	969.828	77.89	30.4184
ZMCFTHFHMLRPFCGSGSDYKDDDDK	998.45	998.582	40.45	31.7596
ZMCFTHFHMLDPFCGSGSDYKDDDDK	984.75	984.737	66.8	33.9773
ZMCFTHFHMLQPFCGSGSDYKDDDDK	989.097	989.13	73.37	39.2915
ZMCFTHFHMLEPFCGSGSDYKDDDDK	989.423	989.197	71.84	35.3572
ZMCFTHFHMLGPFCGSGSDYKDDDDK	965.403	965.368	84.12	27.8883
ZMCFTHFHMLHPFCGSGSDYKDDDDK	992.1	992.059	64.44	26.9859
ZMCFTHFHMLIPFCGSGSDYKDDDDK	984.107	984.271	68.83	11.4556
ZMCFTHFHMLLPFCGSGSDYKDDDDK	984.107	983.672	89.39	14.8772
ZMCFTHFHMLKPFCGSGSDYKDDDDK	989.11	988.997	17.53	6.23786
ZMCFTHFHMLFPFCGSGSDYKDDDDK	995.447	996.053	94.88	148.192
ZMCFTHFHMLPPFCGSGSDYKDDDDK	978.76	978.48	77.7	26.6063
ZMCFTHFHMLSPFCGSGSDYKDDDDK	975.413	975.419	70.31	54.8933
ZMCFTHFHMLTPFCGSGSDYKDDDDK	980.087	980.145	70.66	27.8623
ZMCFTHFHMLYPFCGSGSDYKDDDDK	1000.78	1000.98	40.98	53.4156
ZMCFTHFHMLVPFCGSGSDYKDDDDK	979.43	979.479	68.45	16.4601
ZMCFTHFHMLWAFCGSGSDYKDDDDK	999.777	1000.45	46.84	38.2136
ZMCFTHFHMLWRFCGSGSDYKDDDDK	1028.15	1156.53	0	0
ZMCFTHFHMLWDFCGSGSDYKDDDDK	1014.45	1014.69	62.91	13.044
ZMCFTHFHMLWQFCGSGSDYKDDDDK	1018.79	1018.75	51.2	5.70545
ZMCFTHFHMLWEFCGSGSDYKDDDDK	1019.12	1019.15	43.03	10.949
ZMCFTHFHMLWGFCGSGSDYKDDDDK	995.1	994.855	44.43	34.1369
ZMCFTHFHMLWHFCGSGSDYKDDDDK	1021.8	1021.81	47.36	20.4669
ZMCFTHFHMLWIFCGSGSDYKDDDDK	1013.8	1014.56	64.44	89.0825
ZMCFTHFHMLWLFCGSGSDYKDDDDK	1013.8	1014.29	58.16	89.1377
ZMCFTHFHMLWKFCGSGSDYKDDDDK	1018.81	1019.88	2.5	3.78167
ZMCFTHFHMLWFFCGSGSDYKDDDDK	1025.14	1025.94	61.63	77.1674
ZMCFTHFHMLWSFCGSGSDYKDDDDK	1005.11	1005.84	45.13	49.7587
ZMCFTHFHMLWTFCGSGSDYKDDDDK	1009.78	1010.3	46.61	50.4526
ZMCFTHFHMLWWFCGSGSDYKDDDDK	1038.15	1038.85	47.19	30.7786
ZMCFTHFHMLWYFCGSGSDYKDDDDK	1030.47	1031.2	52.89	10.9616
ZMCFTHFHMLWVFCGSGSDYKDDDDK	1009.13	1009.83	56.88	21.4721
ZMCFTHFHMLWPACGSGSDYKDDDDK	983.09	983.339	72.47	20.3747
ZMCFTHFHMLWPRCGSGSDYKDDDDK	1011.46	1012.09	41.58	8.30546
ZMCFTHFHMLWPDCGSGSDYKDDDDK	997.76	997.517	75.53	18.3215
ZMCFTHFHMLWPQCGSGSDYKDDDDK	1002.11	1002.51	71.3	22.1147
ZMCFTHFHMLWPECGSGSDYKDDDDK	1002.43	1002.51	75.92	22.49
ZMCFTHFHMLWPGCGSGSDYKDDDDK	978.413	978.347	78.67	16.9797
ZMCFTHFHMLWPHCGSGSDYKDDDDK	1005.11	1005.44	52.08	7.93764
ZMCFTHFHMLWPICGSGSDYKDDDDK	997.117	997.517	78.67	17.4635
ZMCFTHFHMLWPLCGSGSDYKDDDDK	997.117	997.118	81.72	20.5888
ZMCFTHFHMLWPKCGSGSDYKDDDDK	1002.12	1002.04	14.03	0.984782
ZMCFTHFHMLWPPCGSGSDYKDDDDK	991.77	991.793	59.75	23.2197
ZMCFTHFHMLWPSCGSGSDYKDDDDK	988.423	988.864	78.86	28.8829
ZMCFTHFHMLWPTCGSGSDYKDDDDK	993.097	992.924	81.6	20.722
ZMCFTHFHMLWPWCGSGSDYKDDDDK	1021.47	1021.28	66.52	26.5224
ZMCFTHFHMLWPYCGSGSDYKDDDDK	1013.79	1013.49	69.76	20.9108
ZMCFTHFHMLWPVCGSGSDYKDDDDK	992.44	992.725	0	0
ZMCFTHFHMWLPFCGSGSDYKDDDDK	1008.46	1009.43	87.9	45.6261
ZMCTFFHMHWLFPCGSGSDYKDDDDK	1008.46	1008.7	77.22	12.4422
ZMCTFPFWMFHLHCGSGSDYKDDDDK	1008.46	1009.03	79.79	12.193
ZMCFPWLMHFHTFCGSGSDYKDDDDK	1008.46	1008.5	83.98	12.3414
ZMCATHFHMLWPFCGSGSDYKDDDDK	983.09	982.62	47.51	21.9276
ZMCRTHFHMLWPFCGSGSDYKDDDDK	1011.46	1011.11	62.8	19.2998
ZMCDTHFHMLWPFCGSGSDYKDDDDK	997.76	997.83	49.08	12.3789
ZMCQTHFHMLWPFCGSGSDYKDDDDK	1002.11	1001.72	54.19	12.9189
ZMCETHFHMLWPFCGSGSDYKDDDDK	1002.43	1002.12	49.01	19.1189
ZMCGTHFHMLWPFCGSGSDYKDDDDK	978.413	978.09	51.67	27.0222
ZMCHTHFHMLWPFCGSGSDYKDDDDK	1005.11	1004.81	57.64	18.5783
ZMCITHFHMLWPFCGSGSDYKDDDDK	997.117	996.77	53.11	17.5339
ZMCLTHFHMLWPFCGSGSDYKDDDDK	997.117	996.82	46.38	14.295
ZMCKTHFHMLWPFCGSGSDYKDDDDK	1002.12	1001.79	54.15	15.6121
ZMCPTHFHMLWPFCGSGSDYKDDDDK	991.77	991.29	41.97	12.6373
ZMCSTHFHMLWPFCGSGSDYKDDDDK	988.423	988.1	51.04	10.4813
ZMCTTHFHMLWPFCGSGSDYKDDDDK	993.097	992.85	43.82	12.6878
ZMCWTHFHMLWPFCGSGSDYKDDDDK	1021.47	1021.11	29.99	5.58816
ZMCYTHFHMLWPFCGSGSDYKDDDDK	1013.79	1013.48	41.67	10.6374
ZMCVTHFHMLWPFCGSGSDYKDDDDK	992.44	992.16	32.35	12.8229
ZACFTHFHMLWPFCGSGSDYKDDDDK	988.417	988.23	61.23	18.5492
ZMCFAHFHMLWPFCGSGSDYKDDDDK	998.45	998.26	46.08	10.3875
ZMCFRHFHMLWPFCGSGSDYKDDDDK	1026.82	1026.61	48.33	11.8845
ZMCFDHFHMLWPFCGSGSDYKDDDDK	1013.12	1012.91	65.93	25.6488
ZMCFQHFHMLWPFCGSGSDYKDDDDK	1017.47	1017.22	71.86	23.7374
ZMCFEHFHMLWPFCGSGSDYKDDDDK	1017.79	1017.46	74.7	16.6704
ZMCFGHFHMLWPFCGSGSDYKDDDDK	993.773	993.47	58.84	25.2697
ZMCFHHFHMLWPFCGSGSDYKDDDDK	1020.47	1020.3	61.89	26.7216
ZMCFIHFHMLWPFCGSGSDYKDDDDK	1012.48	1012.82	33.45	10.7972
ZMCFLHFHMLWPFCGSGSDYKDDDDK	1012.48	1012.82	31.1	7.18207
ZMCFKHFHMLWPFCGSGSDYKDDDDK	1017.48	1017.3	50.65	15.9451
ZMCFFHFHMLWPFCGSGSDYKDDDDK	1023.82	1024.14	28.89	14.6196
ZMCFPHFHMLWPFCGSGSDYKDDDDK	1007.13	1006.83	54.85	17.3282
ZMCFSHFHMLWPFCGSGSDYKDDDDK	1003.78	1003.52	56.01	24.378
ZMCFWHFHMLWPFCGSGSDYKDDDDK	1036.83	1036.63	20.06	2.37126
ZMCFYHFHMLWPFCGSGSDYKDDDDK	1029.15	1029.27	18.96	3.79719
ZMCFVHFHMLWPFCGSGSDYKDDDDK	1007.8	1008.21	39.23	8.50799
ZMCFTHFHMLWPFCGSGSDYKDDDDK	1008.46	1008.02	12.23	0.961324
ZMCFTAFHMLWPFCGSGSDYKDDDDK	986.437	986.15	45.26	8.25673
ZMCFTRFHMLWPFCGSGSDYKDDDDK	1014.81	1014.5	50.78	9.38722
ZMCFTDFHMLWPFCGSGSDYKDDDDK	1001.11	1000.8	47.93	10.3051
ZMCFTQFHMLWPFCGSGSDYKDDDDK	1005.45	1005.02	43.84	10.6756
ZMCFTEFHMLWPFCGSGSDYKDDDDK	1005.78	1005.42	50.49	9.88149
ZMCFTGFHMLWPFCGSGSDYKDDDDK	981.76	981.56	45.77	11.5689
ZMCFTIFHMLWPFCGSGSDYKDDDDK	1000.46	1000.87	47.69	10.6366
ZMCFTLFHMLWPFCGSGSDYKDDDDK	1000.46	1000.83	24.84	22.4965
ZMCFTKFHMLWPFCGSGSDYKDDDDK	1005.47	1005.23	50.06	14.6547
ZMCFTFFHMLWPFCGSGSDYKDDDDK	1011.8	1012.21	42.24	6.37861
ZMCFTPFHMLWPFCGSGSDYKDDDDK	995.117	994.74	53.6	11.8006
ZMCFTSFHMLWPFCGSGSDYKDDDDK	991.77	991.54	48.92	9.14546
ZMCFTTFHMLWPFCGSGSDYKDDDDK	996.443	996.19	37.11	6.46956
ZMCFTWFHMLWPFCGSGSDYKDDDDK	1024.81	1024.45	23.4	3.7943
ZMCFTYFHMLWPFCGSGSDYKDDDDK	1017.13	1017.51	33.36	10.632
ZMCFTVFHMLWPFCGSGSDYKDDDDK	995.787	995.41	14.76	2.97703
ZMCFTHFHMLWPFCGSGSDYKDDDDK	1008.46	1008.84	19.23	1.3607
ZMCFTHAHMLWPFCGSGSDYKDDDDK	983.09	982.85	50.6	16.7333
ZMCFTHRHMLWPFCGSGSDYKDDDDK	1011.46	1011.19	58.78	14.0781
ZMCFTHDHMLWPFCGSGSDYKDDDDK	997.76	997.57	67.09	20.0417
ZMCFTHQHMLWPFCGSGSDYKDDDDK	1002.11	1001.82	77.8	10.7571
ZMCFTHEHMLWPFCGSGSDYKDDDDK	1002.43	1002.14	65.4	13.5002
ZMCFTHGHMLWPFCGSGSDYKDDDDK	978.413	978.14	73.71	15.4095
ZMCFTHHHMLWPFCGSGSDYKDDDDK	1005.11	1004.76	62.71	9.83545
ZMCFTHIHMLWPFCGSGSDYKDDDDK	997.117	996.85	72.44	11.8412
ZMCFTHLHMLWPFCGSGSDYKDDDDK	997.117	996.82	56.25	16.6876
ZMCFTHKHMLWPFCGSGSDYKDDDDK	1002.12	1001.8	48.74	13.8111
ZMCFTHPHMLWPFCGSGSDYKDDDDK	991.77	991.61	68.26	14.0319
ZMCFTHSHMLWPFCGSGSDYKDDDDK	988.423	988.14	54.35	16.8381
ZMCFTHTHMLWPFCGSGSDYKDDDDK	993.097	992.82	67.6	16.0686
ZMCFTHWHMLWPFCGSGSDYKDDDDK	1021.47	1021.17	65.83	14.6527
ZMCFTHYHMLWPFCGSGSDYKDDDDK	1013.79	1013.28	60.32	6.40714
ZMCFTHVHMLWPFCGSGSDYKDDDDK	992.44	992.12	71.05	13.0271
ZMCFTHFAMLWPFCGSGSDYKDDDDK	986.437	986	21.36	4.6951
ZMCFTHFRMLWPFCGSGSDYKDDDDK	1014.81	1014.33	13.47	1.98905
ZMCFTHFDMLWPFCGSGSDYKDDDDK	1001.11	1000.75	64.92	13.3355
ZMCFTHFQMLWPFCGSGSDYKDDDDK	1005.45	1005.1	13.64	4.96996
ZMCFTHFEMLWPFCGSGSDYKDDDDK	1005.78	1005.44	56.84	15.3963
ZMCFTHFGMLWPFCGSGSDYKDDDDK	981.76	981.49	52.01	11.5223
ZMCFTHFIMLWPFCGSGSDYKDDDDK	1000.46	1000.15	10.72	4.1557
ZMCFTHFLMLWPFCGSGSDYKDDDDK	1000.46	1000.84	31.82	9.73983
ZMCFTHFKMLWPFCGSGSDYKDDDDK	1005.47	1005.28	14.86	6.09465
ZMCFTHFFMLWPFCGSGSDYKDDDDK	1011.8	1012.04	35.33	1.65591
ZMCFTHFPMLWPFCGSGSDYKDDDDK	995.117	994.77	62.04	10.3417
ZMCFTHFSMLWPFCGSGSDYKDDDDK	991.77	991.44	10.01	4.506
ZMCFTHFTMLWPFCGSGSDYKDDDDK	996.443	996.27	70.8	7.24255
ZMCFTHFWMLWPFCGSGSDYKDDDDK	1024.81	1024.41	37.33	3.52274
ZMCFTHFYMLWPFCGSGSDYKDDDDK	1017.13	1016.73	31.62	10.0112
ZMCFTHFVMLWPFCGSGSDYKDDDDK	995.787	996.21	29.22	13.5934
ZMCFTHFHMWLPFCGSGSDYKDDDDK	1008.46	1008.41	58.18	6.32028
ZMCTFFHMHWLFPCGSGSDYKDDDDK	1008.46	1008.23	39.74	9.25347
ZMCTFPFWMFHLHCGSGSDYKDDDDK	1008.46	1008.16	92.36	14.5551
ZMCFPWLMHFHTFCGSGSDYKDDDDK	1008.46	1008.02	68.53	6.32217
ZACFQYFHILWPFCGSGSDYKDDDDK	1000.09	999.847	76.68	67.8439
ZMCFQYFHALWPFCGSGSDYKDDDDK	1006.1	1006.17	92.11	35.9804
ZMCFQYFHRLWPFCGSGSDYKDDDDK	1034.47	1034.46	79.24	66.9423
ZMCFQYFHDLWPFCGSGSDYKDDDDK	1020.77	1020.81	71.26	43.0556
ZMCFQYFHQLWPFCGSGSDYKDDDDK	1025.12	1025.41	76.85	51.5549
ZMCFQYFHELWPFCGSGSDYKDDDDK	1025.45	1025.14	85.79	49.4419
ZMCFQYFHGLWPFCGSGSDYKDDDDK	1001.43	1001.18	91.34	42.3895
ZMCFQYFHHLWPFCGSGSDYKDDDDK	1028.12	1028.07	91.04	46.9788
ZMCFQYFHLLWPFCGSGSDYKDDDDK	1020.13	1020.08	74.97	37.2992
ZMCFQYFHKLWPFCGSGSDYKDDDDK	1025.13	1025.21	89.94	54.5783
ZMCFQYFHFLWPFCGSGSDYKDDDDK	1031.47	1031.13	85.64	21.1349
ZMCFQYFHPLWPFCGSGSDYKDDDDK	1014.78	1014.49	76.44	64.5951
ZMCFQYFHSLWPFCGSGSDYKDDDDK	1011.44	1011.49	72.94	66.193
ZMCFQYFHTLWPFCGSGSDYKDDDDK	1016.11	1016.15	67.26	60.0821
ZMCFQYFHWLWPFCGSGSDYKDDDDK	1044.48	1044.44	86.83	30.733
ZMCFQYFHYLWPFCGSGSDYKDDDDK	1036.8	1036.79	88.23	38.098
ZMCFQYFHVLWPFCGSGSDYKDDDDK	1015.45	1015.49	76.03	49.83
ZMCFQYFHILWPFCGSGSDYKDDDDK	1020.13	1020.08	23.37	66.168
ZMCFQYFHIAWPFCGSGSDYKDDDDK	1006.1	1006.44	32.75	56.6542
ZMCFQYFHIRWPFCGSGSDYKDDDDK	1034.47	1034.86	38.41	63.4622
ZMCFQYFHIDWPFCGSGSDYKDDDDK	1020.77	1020.75	63.25	60.4934
ZMCFQYFHIQWPFCGSGSDYKDDDDK	1025.12	1025.61	32.56	56.3836
ZMCFQYFHIEWPFCGSGSDYKDDDDK	1025.45	1025.41	66.4	55.7806
ZMCFQYFHIGWPFCGSGSDYKDDDDK	1001.43	1001.44	83.94	30.0072
ZMCFQYFHIHWPFCGSGSDYKDDDDK	1028.12	1028.2	25.86	77.1795
ZMCFQYFHIIWPFCGSGSDYKDDDDK	1020.13	1020.08	23.64	57.8358
ZMCFQYFHIKWPFCGSGSDYKDDDDK	1025.13	1024.94	90.92	63.699
ZMCFQYFHIFWPFCGSGSDYKDDDDK	1031.47	1031.6	29.68	69.367
ZMCFQYFHIPWPFCGSGSDYKDDDDK	1014.78	1014.96	83.023	51.883
ZMCFQYFHISWPFCGSGSDYKDDDDK	1011.44	1011.89	20.69	79.7875
ZMCFQYFHITWPFCGSGSDYKDDDDK	1016.11	1035.66	0	67.414
ZMCFQYFHIWWPFCGSGSDYKDDDDK	1044.48	1045.24	0	79.6569
ZMCFQYFHIYWPFCGSGSDYKDDDDK	1036.8	1037.12	27.23	57.147
ZMCFQYFHIVWPFCGSGSDYKDDDDK	1015.45	1015.49	22.32	54.4584
ZMCFQYFHILWPFCGSGSDYKDDDDK	1020.13	1020.08	56.55	24.8988
ZMCFQYFHILAPFCGSGSDYKDDDDK	981.753	981.809	62.68	35.1921
ZMCFQYFHILRPFCGSGSDYKDDDDK	1010.12	1010.03	64.066	37.7677
ZMCFQYFHILDPFCGSGSDYKDDDDK	996.423	996.519	76.67	54.8963
ZMCFQYFHILQPFCGSGSDYKDDDDK	1000.77	1000.84	82.6	50.9608
ZMCFQYFHILEPFCGSGSDYKDDDDK	1001.1	1001.24	82.44	65.8278
ZMCFQYFHILGPFCGSGSDYKDDDDK	977.077	977.149	86.919	59.7701
ZMCFQYFHILHPFCGSGSDYKDDDDK	1003.77	1003.84	95.66	33.8722
ZMCFQYFHILIPFCGSGSDYKDDDDK	995.78	996.252	49.63	82.7994
ZMCFQYFHILLPFCGSGSDYKDDDDK	995.78	996.186	42.1	30.5288
ZMCFQYFHILKPFCGSGSDYKDDDDK	1000.78	1000.91	79.001	33.1241
ZMCFQYFHILFPFCGSGSDYKDDDDK	1007.12	0	0	82.2643
ZMCFQYFHILPPFCGSGSDYKDDDDK	990.433	990.262	88.12	55.8341
ZMCFQYFHILSPFCGSGSDYKDDDDK	987.087	986.867	70.97	44.6263
ZMCFQYFHILTPFCGSGSDYKDDDDK	991.76	991.66	65.21	31.913
ZMCFQYFHILYPFCGSGSDYKDDDDK	1012.45	1012.16	45.27	21.2356
ZMCFQYFHILVPFCGSGSDYKDDDDK	991.103	991.526	46	79.5074
ZMCFQYFHILWAFCGSGSDYKDDDDK	1011.45	1012.03	64.89	79.5887
ZMCFQYFHILWRFCGSGSDYKDDDDK	1039.82	1040.71	80.71	51.9321
ZMCFQYFHILWDFCGSGSDYKDDDDK	1026.12	1026.6	74.16	22.4145
ZMCFQYFHILWQFCGSGSDYKDDDDK	1030.47	1030.2	76.59	35.6635
ZMCFQYFHILWEFCGSGSDYKDDDDK	1030.79	1030.86	74.86	13.9213
ZMCFQYFHILWGFCGSGSDYKDDDDK	1006.77	0	0	0
ZMCFQYFHILWHFCGSGSDYKDDDDK	1033.47	1033.86	37.33	25.7869
ZMCFQYFHILWIFCGSGSDYKDDDDK	1025.48	1026.14	47.32	76.0622
ZMCFQYFHILWLFCGSGSDYKDDDDK	1025.48	1026.34	67.61	55.8765
ZMCFQYFHILWKFCGSGSDYKDDDDK	1030.48	1031.53	82.04	58.6135
ZMCFQYFHILWFFCGSGSDYKDDDDK	1036.82	1037.59	58.36	59.3162
ZMCFQYFHILWSFCGSGSDYKDDDDK	1016.78	1017.22	64.85	107.299
ZMCFQYFHILWTFCGSGSDYKDDDDK	1021.46	1022.01	62.12	52.3762
ZMCFQYFHILWWFCGSGSDYKDDDDK	1049.83	1050.23	50.88	44.3407
ZMCFQYFHILWYFCGSGSDYKDDDDK	1042.15	1042.84	55.939	34.9279
ZMCFQYFHILWVFCGSGSDYKDDDDK	1020.8	1021.48	45.87	32.2786
ZMCFQYFHILWPACGSGSDYKDDDDK	994.763	994.921	67.89	29.3537
ZMCFQYFHILWPRCGSGSDYKDDDDK	1023.13	1023.14	25.06	65.534
ZMCFQYFHILWPDCGSGSDYKDDDDK	1009.43	1009.5	88.54	28.6795
ZMCFQYFHILWPQCGSGSDYKDDDDK	1013.78	1013.89	77.78	36.8916
ZMCFQYFHILWPECGSGSDYKDDDDK	1014.11	1014.16	87.51	43.5359
ZMCFQYFHILWPGCGSGSDYKDDDDK	990.087	990.461	39.27	58.0252
ZMCFQYFHILWPHCGSGSDYKDDDDK	1016.78	1016.82	46.97	28.4721
ZMCFQYFHILWPICGSGSDYKDDDDK	1008.79	1009.23	65.12	31.5229
ZMCFQYFHILWPLCGSGSDYKDDDDK	1008.79	1008.83	72.01	41.3862
ZMCFQYFHILWPKCGSGSDYKDDDDK	1013.79	1014.16	61.63	18.4456
ZMCFQYFHILWPPCGSGSDYKDDDDK	1003.44	1003.64	45.56	39.1651
ZMCFQYFHILWPSCGSGSDYKDDDDK	1000.1	1000.25	64.59	43.0458
ZMCFQYFHILWPTCGSGSDYKDDDDK	1004.77	1004.84	84.12	33.54
ZMCFQYFHILWPWCGSGSDYKDDDDK	1033.14	1033.33	59.91	31.1671
ZMCFQYFHILWPYCGSGSDYKDDDDK	1025.46	1025.61	63.18	39.1044
ZMCFQYFHILWPVCGSGSDYKDDDDK	1004.11	1004.17	69.8	38.4419
ZMCFQYFHIWLPFCGSGSDYKDDDDK	1020.13	1020.81	51.66	83.4698
ZMCQFFYIHWLFPCGSGSDYKDDDDK	1020.13	1020.48	75.66	52.1502
ZMCQFPFWIFYLHCGSGSDYKDDDDK	1020.13	1020.55	42.85	76.1177
ZMCFPWLIHFYQFCGSGSDYKDDDDK	1020.13	1020.55	80.9	11.077
ZMCAQYFHILWPFCGSGSDYKDDDDK	994.763	994.42	63.04	18.0117
ZMCRQYFHILWPFCGSGSDYKDDDDK	1023.13	1022.78	50.91	21.3979
ZMCDQYFHILWPFCGSGSDYKDDDDK	1009.43	1009.1	73.4	24.302
ZMCQQYFHILWPFCGSGSDYKDDDDK	1013.78	1013.4	79.47	29.1404
ZMCEQYFHILWPFCGSGSDYKDDDDK	1014.11	1013.82	63.66	29.3214
ZMCGQYFHILWPFCGSGSDYKDDDDK	990.087	989.84	64.15	25.4304
ZMCHQYFHILWPFCGSGSDYKDDDDK	1016.78	1016.31	55.95	30.487
ZMCIQYFHILWPFCGSGSDYKDDDDK	1008.79	1008.47	21	30.404
ZMCLQYFHILWPFCGSGSDYKDDDDK	1008.79	1008.44	40.63	16.6692
ZMCKQYFHILWPFCGSGSDYKDDDDK	1013.79	1013.44	46.02	26.2412
ZMCPQYFHILWPFCGSGSDYKDDDDK	1003.44	1003.13	69.66	31.0039
ZMCSQYFHILWPFCGSGSDYKDDDDK	1000.1	999.81	66.11	24.7981
ZMCTQYFHILWPFCGSGSDYKDDDDK	1004.77	1004.48	62.6	19.452
ZMCWQYFHILWPFCGSGSDYKDDDDK	1033.14	1032.79	35.51	10.4333
ZMCYQYFHILWPFCGSGSDYKDDDDK	1025.46	1025.17	45.85	57.2126
ZMCVQYFHILWPFCGSGSDYKDDDDK	1004.11	1003.81	42.51	74.2482
ZACFQYFHILWPFCGSGSDYKDDDDK	1000.09	999.73	50.47	22.8514
ZMCFAYFHILWPFCGSGSDYKDDDDK	1001.11	1000.76	15.06	65.5117
ZMCFRYFHILWPFCGSGSDYKDDDDK	1029.48	1028.99	16.11	121.655
ZMCFDYFHILWPFCGSGSDYKDDDDK	1015.78	1015.39	60.69	34.9542
ZMCFEYFHILWPFCGSGSDYKDDDDK	1020.46	1020.14	46.95	18.9921
ZMCFGYFHILWPFCGSGSDYKDDDDK	996.437	996.1	32.37	34.7612
ZMCFHYFHILWPFCGSGSDYKDDDDK	1023.13	1022.83	23.21	12.226
ZMCFIYFHILWPFCGSGSDYKDDDDK	1015.14	1015.89	0	37.8749
ZMCFLYFHILWPFCGSGSDYKDDDDK	1015.14	1015.95	0	51.949
ZMCFKYFHILWPFCGSGSDYKDDDDK	1020.14	1019.76	18.02	136.27
ZMCFFYFHILWPFCGSGSDYKDDDDK	1026.48	1027.27	0	89.4643
ZMCFPYFHILWPFCGSGSDYKDDDDK	1009.79	1009.52	51.2	22.5753
ZMCFSYFHILWPFCGSGSDYKDDDDK	1006.45	1005.97	24.45	95.4726
ZMCFTYFHILWPFCGSGSDYKDDDDK	1011.12	1011.83	0	97.3965
ZMCFWYFHILWPFCGSGSDYKDDDDK	1039.49	1039.52	12.41	43.4332
ZMCFYYFHILWPFCGSGSDYKDDDDK	1031.81	1031.38	8.89	46.2441
ZMCFVYFHILWPFCGSGSDYKDDDDK	1010.46	1011.23	0	27.4662
ZMCFQYFHILWPFCGSGSDYKDDDDK	1020.13	1019.79	29.51	21.3758
ZMCFQAFHILWPFCGSGSDYKDDDDK	989.433	989.16	51.27	21.9459
ZMCFQRFHILWPFCGSGSDYKDDDDK	1017.8	1017.5	54.28	14.6877
ZMCFQDFHILWPFCGSGSDYKDDDDK	1004.1	1003.8	65.42	21.951
ZMCFQQFHILWPFCGSGSDYKDDDDK	1008.45	1008.13	62.56	30.5784
ZMCFQEFHILWPFCGSGSDYKDDDDK	1008.78	1008.44	60.34	25.4921
ZMCFQGFHILWPFCGSGSDYKDDDDK	984.757	984.42	53.12	32.8041
ZMCFQHFHILWPFCGSGSDYKDDDDK	1011.45	1011.17	55.07	25.1191
ZMCFQIFHILWPFCGSGSDYKDDDDK	1003.46	1008.32	0	30.6728
ZMCFQLFHILWPFCGSGSDYKDDDDK	1003.46	1003.14	16.19	28.7726
ZMCFQKFHILWPFCGSGSDYKDDDDK	1008.46	1008.12	56.07	18.9078
ZMCFQFFHILWPFCGSGSDYKDDDDK	1014.8	1014.7	13.69	35.8225
ZMCFQPFHILWPFCGSGSDYKDDDDK	998.113	997.76	69.78	25.2543
ZMCFQSFHILWPFCGSGSDYKDDDDK	994.767	994.47	53.66	17.3026
ZMCFQTFHILWPFCGSGSDYKDDDDK	999.44	999.06	39.78	15.937
ZMCFQWFHILWPFCGSGSDYKDDDDK	1027.81	1027.45	23.72	38.1698
ZMCFQVFHILWPFCGSGSDYKDDDDK	998.783	1017.8	0	72.2616
ZMCFQYFHILWPFCGSGSDYKDDDDK	1020.13	1019.79	36.73	92.1201
ZMCFQYAHILWPFCGSGSDYKDDDDK	994.763	994.44	60.42	31.8577
ZMCFQYRHILWPFCGSGSDYKDDDDK	1023.13	1022.76	63.55	28.9681
ZMCFQYDHILWPFCGSGSDYKDDDDK	1009.43	1009.11	68.39	28.2027
ZMCFQYQHILWPFCGSGSDYKDDDDK	1013.78	1013.44	82.23	21.4696
ZMCFQYEHILWPFCGSGSDYKDDDDK	1014.11	1013.79	64.4	22.9184
ZMCFQYGHILWPFCGSGSDYKDDDDK	990.087	989.78	73.54	26.5457
ZMCFQYHHILWPFCGSGSDYKDDDDK	1016.78	1016.45	72.19	24.5221
ZMCFQYIHILWPFCGSGSDYKDDDDK	1008.79	1008.41	10.89	81.7249
ZMCFQYLHILWPFCGSGSDYKDDDDK	1008.79	1008.49	39.88	26.3874
ZMCFQYKHILWPFCGSGSDYKDDDDK	1013.79	1013.44	63.46	21.287
ZMCFQYPHILWPFCGSGSDYKDDDDK	1003.44	1003.09	60.42	31.3442
ZMCFQYSHILWPFCGSGSDYKDDDDK	1000.1	999.77	68.28	30.6059
ZMCFQYTHILWPFCGSGSDYKDDDDK	1004.77	1004.44	64.51	31.3706
ZMCFQYWHILWPFCGSGSDYKDDDDK	1033.14	1032.62	19.54	82.9651
ZMCFQYYHILWPFCGSGSDYKDDDDK	1025.46	1025.09	61.66	19.9973
ZMCFQYVHILWPFCGSGSDYKDDDDK	1004.11	1003.64	43.5	20.5791
ZMCFQYFAILWPFCGSGSDYKDDDDK	998.11	997.85	25.1	28.9948
ZMCFQYFRILWPFCGSGSDYKDDDDK	1026.48	1026.27	11.39	51.5584
ZMCFQYFDILWPFCGSGSDYKDDDDK	1012.78	1012.36	61.91	28.2828
ZMCFQYFQILWPFCGSGSDYKDDDDK	1017.13	1016.69	19.96	69.1319
ZMCFQYFEILWPFCGSGSDYKDDDDK	1017.45	1016.92	63.42	29.8255
ZMCFQYFGILWPFCGSGSDYKDDDDK	993.433	993.04	33.42	29.0712
ZMCFQYFIILWPFCGSGSDYKDDDDK	1012.14	0	0	60.2318
ZMCFQYFLILWPFCGSGSDYKDDDDK	1012.14	1012.7	0	41.5627
ZMCFQYFKILWPFCGSGSDYKDDDDK	1017.14	1016.54	12.3	129.457
ZMCFQYFFILWPFCGSGSDYKDDDDK	1023.48	1023.73	24.44	22.9318
ZMCFQYFPILWPFCGSGSDYKDDDDK	1006.79	1006.42	43.68	18.4862
ZMCFQYFSILWPFCGSGSDYKDDDDK	1003.44	1003.01	24.92	25.4015
ZMCFQYFTILWPFCGSGSDYKDDDDK	1008.12	1007.62	17.86	16.2017
ZMCFQYFWILWPFCGSGSDYKDDDDK	1036.49	1035.78	26.23	31.6946
ZMCFQYFYILWPFCGSGSDYKDDDDK	1028.81	1029.59	0	31.3102
ZMCFQYFVILWPFCGSGSDYKDDDDK	1007.46	1006.99	21.78	25.6536
ZMCFQYFHIWLPFCGSGSDYKDDDDK	1020.13	1020.17	25.78	46.3195
ZMCQFFYIHWLFPCGSGSDYKDDDDK	1020.13	1019.95	24.31	57.5214
ZMCQFPFWIFYLHCGSGSDYKDDDDK	1020.13	1019.7	50.11	34.5383
ZMCFPWLIHFYQFCGSGSDYKDDDDK	1020.13	1019.85	26.81	17.5464
ZMCPWAFTIFRFWCGSGSDYKDDDDK	1011.12	1011.49	33.24	39.0616
ZMCLYFSEMVFAVCGSGSDYKDDDDK	956.06	955.71	35.76	11.8529
ZMCLYFSECVFAVMGSGSDYKDDDDK	956.06	113.71	0	9.39964
ZMMLYFSECVFAVCGSGSDYKDDDDK	956.06	200.17	0	9.59153
ZMCQLFFYPAFWFCGSGSDYKDDDDK	1009.45	1009.38	40.37	34.4998
ZMCPWLFSQFAFWCGSGSDYKDDDDK	997.097	996.96	37.51	15.5127
ZMCVSYLAMFPWSCGSGSDYKDDDDK	954.39	954.63	50.76	27.3395
ZMMVSYLACFPWSCGSGSDYKDDDDK	954.39	954.62	44.09	40.2143
ZMCVSYLACFPWSMGSGSDYKDDDDK	954.39	1174.86	0	40.5689
ZMCCFSFYACFFSCGSGSDYKDDDDK	961.39	200.27	0	19.5325
ZMCFSFIACFPLCCGSGSDYKDDDDK	936.727	199.86	0	22.8362
ZMCICFTSRCICGSGSDYKDDDDK	868.303	867.48	70.31	25.2658
ZMCFIHWDMLWPFCGSGSDYKDDDDK	1018.14	1017.92	67.7	30.2423
ZMCFIHWDMLWPSCGSGSDYKDDDDK	998.103	997.92	60.15	44.2804
ZMCLFLPVYPFFACGSGSDYKDDDDK	958.747	958.52	73.32	29.4256
ZMCFFHWDMLWPFCGSGSDYKDDDDK	1029.48	1029.38	62.55	21.8299
ZMCLILPFLTFHICGSGSDYKDDDDK	958.76	958.39	42.96	26.5156
ZMCSQYFHILWPFCGSGSDYKDDDDK	1000.1	1000.05	77.3	37.151
ZMCFIHFSFLWPFCGSGSDYKDDDDK	1001.12	1206.2	0	50.3369
ZMCRFLHPFGLYFCGSGSDYKDDDDK	986.43	986.38	76.61	49.219
ZMCLILPIFPYFICGSGSDYKDDDDK	966.11	200.01	0	26.771
ZMCLFLPVFPFFVCGSGSDYKDDDDK	962.767	199.42	0	35.955
ZMCLFLPVFPYWLCGSGSDYKDDDDK	985.783	1100.02	0	52.4423
ZMCLILPTFPYFICGSGSDYKDDDDK	962.09	962.19	60.67	40.4743
ZMCFQYFHILWPFCGSGSDYKDDDDK	1020.13	1020.18	63.09	40.4332
ZMCFQYFRILWPFCGSGSDYKDDDDK	1026.48	200.22	0	27.2974
ZMCFQYFHTLWPFCGSGSDYKDDDDK	1016.11	1016.18	71.68	30.5388
ZMCFTHFHVLWPFCGSGSDYKDDDDK	997.767	997.51	65.74	18.3647
ZMCTFGIMFFYACGSGSDYKDDDDK	919.687	114.03	0	20.3458
ZMCTFGICFFYAMGSGSDYKDDDDK	919.687	345.05	0	24.3851
ZMMTFGICFFYACGSGSDYKDDDDK	919.687	131.27	0	28.0773
ZMCHMLSWPYSNICGSGSDYKDDDDK	970.06	970.2	57.48	40.2592
ZMCFTHFHVLWPSCGSGSDYKDDDDK	977.733	977.75	61.47	48.5759
ZMCFTHWDMLWPFCGSGSDYKDDDDK	1014.12	1013.94	52.31	25.5602
ZMCLFLPVYPFFICGSGSDYKDDDDK	972.773	973.65	61	44.6285
ZMCLMLPVYPFLICGSGSDYKDDDDK	956.107	956.87	74.58	46.9802
ZMCLTIPVFPFFICGSGSDYKDDDDK	952.083	132.05	0	39.5174
ZMCQYLPFLLIPVCGSGSDYKDDDDK	955.083	955.47	82.97	36.54
ZMCIRLNLLLPYICGSGSDYKDDDDK	963.433	963.58	34.87	18.893
ZMCCFSFYFCLFPCGSGSDYKDDDDK	978.763	129.14	0	14.1778
ZMCLMLPWLSSHICGSGSDYKDDDDK	953.077	952.93	54.21	25.3033
ZMCLMLPVYPFFICGSGSDYKDDDDK	967.447	128.81	67.45	38.3988
ZMCLMLPWPYSNICGSGSDYKDDDDK	965.413	973.26	0	22.8481
ZMCLIFTYSKLLSCGSGSDYKDDDDK	949.06	949.46	34.38	12.4356
ZMCFQNYLMYLIVCGSGSDYKDDDDK	988.773	159.16	0	25.6849
ZMCLFFHPFSLYVCGSGSDYKDDDDK	977.42	977.52	52.57	31.2053
ZMCIPFWILLSLHCGSGSDYKDDDDK	967.097	199.88	0	26.669
ZMCLFLPVYPFFVCGSGSDYKDDDDK	968.097	968.23	63.82	52.4844
ZMCLPWFILRSVVCGSGSDYKDDDDK	964.093	964.48	68.07	7.35827
ZMCLIQPIFPYFICGSGSDYKDDDDK	971.1	970.67	75.8	31.548
ZMCFPYFICGSGSDYKDDDDK	1173.78	1173.21	69.38	17.0994
ZMCALFPFPYFICGSGSDYKDDDDK	925.703	200.21	0	20.6416
ZMCLMLPFLPYNICGSGSDYKDDDDK	961.097	131.16	0	37.3674
ZMCLILPIFPYSICGSGSDYKDDDDK	946.077	103.37	0	40.4096
ZMCFFHPYSFVVFCGSGSDYKDDDDK	984.083	984.2	51.51	35.5283
ZMCLFLPVFPYWRCGSGSDYKDDDDK	1000.13	1000.75	60.09	31.8535
ZMCYVWRQMLLCGSGSDYKDDDDK	923.703	924.09	63.78	37.8879
ZMCFQYFHILWPSCGSGSDYKDDDDK	1000.1	1000.04	66.54	32.6319
ZMCFQYIHILWPFCGSGSDYKDDDDK	1008.79	1009.12	42.81	47.0246
ZMCQYLPFLLIPFCGSGSDYKDDDDK	971.1	971.09	78.56	43.4995
ZMCIRLNLLLPYICGSGSDYKDDDDK	963.433	963.71	32.77	19.4723
ZMCTRLNLLLPYICGSGSDYKDDDDK	959.413	959.98	79.27	21.4594
ZMCPWIFSDYSFFCGSGSDYKDDDDK	990.403	991.14	55.55	17.1199
ZMCCFSFYFCPIFCGSGSDYKDDDDK	978.763	239.08	0	3.52713
ZMCPFGFTSFWFWCGSGSDYKDDDDK	994.75	994.61	55.56	30.6335
ZMCLMFQPFYSNICGSGSDYKDDDDK	974.08	973.87	64.78	26.382
ZMCFSNILAFVFSCGSGSDYKDDDDK	935.697	114.15	0	15.1705
ZMCLMLSWPYSNTCGSGSDYKDDDDK	958.047	958.56	54.65	41.8038
ZMCLWHRAWSYYICGSGSDYKDDDDK	1019.11	200.11	0	30.2452
ZMCLIIPVFPFFICGSGSDYKDDDDK	956.103	956.58	47.44	28.672
ZMCFIHWEMLWPFCGSGSDYKDDDDK	1022.81	1022.59	51.75	45.0032
ZMCFRFFSLLWPFCGSGSDYKDDDDK	1007.47	1209.1	0	9.36731
ZMCLILWPFCGSGSDYKDDDDK	816.917	1224.85	0	26.2618
ZMCLMLSWPFCGSGSDYKDDDDK	851.957	280.13	0	27.1448
ZMCFLAFHYLWPFCGSGSDYKDDDDK	1001.11	1001.16	54.88	20.2397
ZMCLMLSFLPYNICGSGSDYKDDDDK	957.75	207.14	0	15.7401
ZMCLFLPYNICGSGSDYKDDDDK	847.27	847.44	72.79	30.2099
ZMCLMLSWPYSNICGSGSDYKDDDDK	962.067	962.75	63.23	18.0227
ZMCYVWRQMLRCGSGSDYKDDDDK	938.047	937.72	67.27	17.8359
ZMCLIIPIFPWILCGSGSDYKDDDDK	962.45	962.75	57.23	21.8986
ZMCLVLPVFPFLLCGSGSDYKDDDDK	940.087	940.35	75.7	30.6401
ZMCLILPIFPYFISGSGSDYKDDDDK	961.43	121.46	0	17.163
ZMCLVLEYSMLVSCGSGSDYKDDDDK	938.713	199.97	0	31.2031
ZMCLMLSFLLYNICGSGSDYKDDDDK	963.097	114.05	0	1.96746
ZMCHFLPFLLVPFCGSGSDYKDDDDK	964.097	964.41	50.17	40.3021
ZMCFIHWDMLWLICGSGSDYKDDDDK	1012.14	1012.24	61.38	27.3369
ZMCRFLPFLLQPICGSGSDYKDDDDK	968.773	968.75	75.93	29.7393
ZMCFQNYLLFLPLCGSGSDYKDDDDK	976.76	976.63	68.53	26.7542
ZYAEGTFISDYSIAMDKGSGSDYKDDDDK	1046.09	924.94	0	23.7649
ZYAEGTFISDYSIAMDGSGSDYKDDDDK	1003.37	212.34	0	27.8809
ZYAEGTFISDYSIAMGSGSDYKDDDDK	965.003	212.32	0	31.431
ZMCFQNYLMYLIACGSGSDYKDDDDK	979.423	123.03	0	37.2636
ZMCFINWDMLWPFCGSGSDYKDDDDK	1010.46	1010.05	50.86	36.0646
